# Supplementary material for: Silver-catalyzed synthesis of β-fluorovinylphosphonates by phosphonofluorination of aromatic alkynes
Source: publisher site journal article supplement (doi:10.3762/bjoc.16.258), 2020-12-18

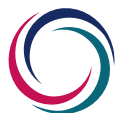

## Supporting Information

for

### **Silver-catalyzed synthesis of $\beta$ -fluorovinylphosphonates by phosphonofluorination of aromatic alkynes**

Yajing Zhang, Qingshan Tian, Guozhu Zhang and Dayong Zhang

*Beilstein J. Org. Chem.* **2020**, *16*, 3086–3092. doi:10.3762/bjoc.16.258

### **Experimental procedures, full characterization of products, and NMR spectra**

## Contents

|                                                          |     |
|----------------------------------------------------------|-----|
| <b>1 Experimental details</b> .....                      | S1  |
| <b>1.1 Optimization of the reaction conditions</b> ..... | S1  |
| <b>2 General information</b> .....                       | S2  |
| <b>2.1 Gram-scale reaction</b> .....                     | S9  |
| <b>3 References</b> .....                                | S9  |
| <b>4 Copies of NMR spectra</b> .....                     | S10 |

## 1 Experimental Details

### 1.1 Optimization of the reaction conditions

#### Catalyst screening

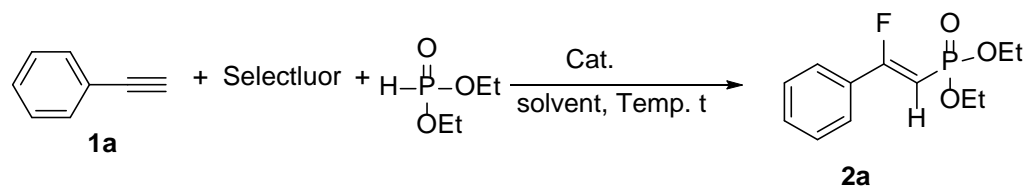

| entry | catalyst                              | yield (%) <sup>a</sup> |
|-------|---------------------------------------|------------------------|
| 1     | CuI                                   | trace                  |
| 2     | AuCl <sub>3</sub>                     | 9%                     |
| 3     | (MeCN) <sub>2</sub> PdCl <sub>2</sub> | no reaction            |
| 4     | [Rh(OH)(COD)] <sub>2</sub>            | no reaction            |
| 5     | Cu(MeCN) <sub>4</sub> PF <sub>4</sub> | 3%                     |
| 6     | CuOAc                                 | trace                  |

<sup>a</sup>Yields determined by <sup>1</sup>H NMR analysis with an internal standard (diethyl phthalate).

## 2 General Information

All reagents were obtained from commercial sources and used without further purification. Thin-layer chromatography (TLC) was performed using 60 mesh silica gel plates visualized with short-wavelength UV light (254 nm).  $^1\text{H}$  NMR spectra were obtained at 400 MHz and recorded relative to the tetramethylsilane signal (0 ppm) or residual proton solvent.  $^{13}\text{C}$  NMR spectra were obtained at 100 MHz, and chemical shifts were recorded relative to the solvent resonance ( $\text{CDCl}_3$ , 77.16 ppm). Data for  $^1\text{H}$  NMR are reported as follows: chemical shift ( $\delta$ , ppm) and multiplicity (s = singlet, d = doublet, t = triplet, q = quartet, m = multiplet or unresolved, br = broad singlet, coupling constant (s) in Hz, integration).

### General procedure for the silver-catalyzed fluorophosphorylation of alkynes

In a vial, **1a** (20.4 mg, 0.2 mmol), Selectfluor<sup>®</sup> (141.7 mg, 0.4 mmol), diethyl phosphonate (55.2 mg, 0.4 mmol), and silver acetate (3.3 mg, 0.02 mmol) were dissolved in DEC/ $\text{H}_2\text{O}$  1 mL:1 mL. The resulting mixture was stirred under  $\text{N}_2$  atmosphere at 60 °C for 24 h. After completion, the reaction was quenched, and the suspension was extracted with  $\text{CH}_2\text{Cl}_2$ . Volatile solvent was evaporated in vacuo, and the residual oil was purified by column chromatography on silica gel with a gradient eluent of petroleum ether and ethyl acetate to afford the fluorine product **2a**. Note: A single *Z*-isomer of the product **2a** was established by comparison with previous reports [1,2].

### Diethyl (*Z*)-(2-fluoro-2-phenylvinyl)phosphonate (**2a**)

The reaction was conducted on a 0.2 mmol scale following the general procedure. The desired product was purified by column chromatography (PE/EA 10:1) to give a colorless oil (40.9 mg, 79%).

$^1\text{H}$  NMR (400 MHz,  $\text{CDCl}_3$ )  $\delta$  7.83-7.81 (m, 2H), 7.51-7.42 (m, 3H), 5.51 (dd,  $J$  = 25.6, 3.3 Hz, 1H), 4.05-3.95 (m, 4H), 1.20-1.17 (m, 6H);  $^{13}\text{C}$  NMR (101 MHz,  $\text{CDCl}_3$ )  $\delta$  169.8 (dd,  $J$  = 272.8, 26.0 Hz), 131.5, 130.4 (d,  $J$  = 28.7 Hz), 128.83, 128.78, 128.2, 95.2 (dd,  $J$  = 202.3, 22.5 Hz), 62.3, 62.2, 16.23, 16.16;  $^{19}\text{F}$  NMR (376 MHz,  $\text{CDCl}_3$ )  $\delta$  -66.9 (dd,  $J$  = 72.9, 25.6 Hz, 1F);  $^{31}\text{P}$  NMR (162 MHz,  $\text{CDCl}_3$ )  $\delta$  15.5 (d,  $J$  = 72.7 Hz, 1P); HR-MS  $m/z$ : Calcd for  $\text{C}_{12}\text{H}_{17}\text{FO}_3\text{P}$   $[\text{M} + \text{H}]^+$  calcd. 259.0905 found 259.0896

### Diethyl (*Z*)-(2-fluoro-2-(*p*-tolyl)vinyl)phosphonate (**2b**)

The reaction was conducted on a 0.2 mmol scale following the general procedure. The desired product was purified by column chromatography (PE/EA 10:1) to give a colorless oil (37.0 mg, 68%).

$^1\text{H}$  NMR (400 MHz,  $\text{CDCl}_3$ )  $\delta$  7.72 (d,  $J$  = 8.0 Hz, 2H), 7.23 (d,  $J$  = 8.0 Hz, 2H), 5.44 (dd,  $J$  = 26.0, 3.6 Hz, 1H), 4.05-3.96 (m, 4H), 2.39 (s, 3H), 1.20 (t,  $J$  = 7.0 Hz, 6H);

$^{13}\text{C}$  NMR (101 MHz,  $\text{CDCl}_3$ )  $\delta$  170.1 (dd,  $J = 272.0, 26.3\text{Hz}$ ), 142.0, 128.9, 128.7 (d,  $J = 6.0\text{ Hz}$ ), 127.5 (d,  $J = 29.4\text{ Hz}$ ), 94.3 (dd,  $J = 203.1, 23.2\text{ Hz}$ ), 62.2, 62.1, 21.7, 16.24, 16.17;  $^{19}\text{F}$  (376 MHz,  $\text{CDCl}_3$ )  $\delta$  -67.0 (dd,  $J = 73.7, 25.9\text{ Hz}$ , 1F);  $^{31}\text{P}$  (162 MHz,  $\text{CDCl}_3$ )  $\delta$  15.9 (d,  $J = 72.7\text{ Hz}$ , 1P); HR-MS  $m/z$ : Calcd for  $\text{C}_{13}\text{H}_{19}\text{FO}_3\text{P}$   $[\text{M} + \text{H}]^+$  calcd. 273.1061 found 273.1053

**Diethyl (Z)-(2-fluoro-2-(*m*-tolyl)vinyl)phosphonate (2c)**

The reaction was conducted on a 0.2 mmol scale following the general procedure. The desired product was purified by column chromatography (PE:EA=10:1) to give a colorless oil (36.4 mg, 67%).

$^1\text{H}$  NMR (400 MHz,  $\text{CDCl}_3$ )  $\delta$  7.63-7.61 (m, 2H), 7.34-7.30 (m, 2H), 5.48 (dd,  $J = 25.2, 3.2\text{ Hz}$ , 1H), 4.05-3.95 (m, 4H), 2.39 (s, 3H), 1.19 (t,  $J = 7.0\text{ Hz}$ , 6H);  $^{13}\text{C}$  NMR (101 MHz,  $\text{CDCl}_3$ )  $\delta$  170.1 (dd,  $J = 272.9, 26.1\text{ Hz}$ ), 137.9, 132.3, 130.4 (d,  $J = 28.9\text{ Hz}$ ), 129.2 (d,  $J = 5.8\text{Hz}$ ), 128.1, 126.1 (d,  $J = 6.2\text{ Hz}$ ), 95.1 (dd,  $J = 203.3, 22.6\text{ Hz}$ ), 62.22, 62.16, 21.5, 16.25, 16.19;  $^{19}\text{F}$  (376 MHz,  $\text{CDCl}_3$ )  $\delta$  -66.6 (dd,  $J = 72.9, 25.2\text{ Hz}$ , 1F);  $^{31}\text{P}$  (162 MHz,  $\text{CDCl}_3$ )  $\delta$  15.7 (d,  $J = 73.2\text{ Hz}$ , 1P); HR-MS  $m/z$ : Calcd for  $\text{C}_{13}\text{H}_{19}\text{FO}_3\text{P}$   $[\text{M} + \text{H}]^+$  calcd. 273.1061 found 273.1050

**Diethyl (Z)-(2-(4-(*tert*-butyl)phenyl)-2-fluorovinyl)phosphonate (2d)**

The reaction was conducted on a 0.2 mmol scale following the general procedure. The desired product was purified by column chromatography (PE/EA 10:1) to give a colorless oil (47.1 mg, 75%).

$^1\text{H}$  NMR (400 MHz,  $\text{CDCl}_3$ )  $\delta$  7.77-7.74 (m, 2H), 7.46-7.44 (m, 2H), 5.45 (dd,  $J = 25.6, 3.2\text{ Hz}$ , 1H), 4.05-3.96 (m, 4H), 1.33 (s, 9H), 1.19 (t,  $J = 7.0\text{ Hz}$ , 6H);  $^{13}\text{C}$  NMR (101 MHz,  $\text{CDCl}_3$ )  $\delta$  170.1 (dd,  $J = 271.8, 26.2\text{ Hz}$ ), 155.1, 128.6 (d,  $J = 6.1\text{ Hz}$ ), 127.4 (dd,  $J = 28.8, 1.4\text{ Hz}$ ), 125.2, 94.2 (dd,  $J = 202.6, 23.0\text{ Hz}$ ), 62.2, 62.1, 35.1, 31.2, 16.2, 16.1;  $^{19}\text{F}$  (376 MHz,  $\text{CDCl}_3$ )  $\delta$  -67.2 (dd,  $J = 73.3, 25.6\text{ Hz}$ , 1F);  $^{31}\text{P}$  (162 MHz,  $\text{CDCl}_3$ )  $\delta$  15.8 (d,  $J = 73.4\text{ Hz}$ , 1P); HR-MS  $m/z$ : Calcd for  $\text{C}_{16}\text{H}_{25}\text{FO}_3\text{P}$   $[\text{M} + \text{H}]^+$  calcd. 315.1531 found 315.1543

**Diethyl (Z)-(2-fluoro-2-(4-methoxyphenyl)vinyl)phosphonate (2e)**

The reaction was conducted on a 0.2 mmol scale following the general procedure. The desired product was purified by column chromatography (PE/EA 5:1) to give a colorless oil (34.6 mg, 60%).

$^1\text{H}$  NMR (400 MHz,  $\text{CDCl}_3$ )  $\delta$  7.81 (d,  $J = 8.8\text{ Hz}$ , 2H), 6.93 (d,  $J = 8.8\text{ Hz}$ , 2H), 5.38 (dd,  $J = 26.0, 3.2\text{ Hz}$ , 1H), 4.05-3.98 (m, 4H), 3.85 (s, 3H), 1.22 (t,  $J = 7.0\text{ Hz}$ , 6H);  $^{13}\text{C}$  NMR (101 MHz,  $\text{CDCl}_3$ )  $\delta$  169.8 (dd,  $J = 270.5, 26.5\text{Hz}$ ), 162.1, 130.6 (d,  $J = 6.7\text{ Hz}$ ), 122.6 (dd,  $J = 29.2, 1.4\text{ Hz}$ ), 113.6, 92.9 (dd,  $J = 202.9, 23.7\text{ Hz}$ ), 62.2, 62.1, 55.5, 16.3, 16.2;  $^{19}\text{F}$  (376 MHz,  $\text{CDCl}_3$ )  $\delta$  -67.4 (dd,  $J = 74.1, 26.3\text{ Hz}$ , 1F);  $^{31}\text{P}$  (162

MHz, CDCl<sub>3</sub>)  $\delta$  16.3 (d,  $J$  = 74.0 Hz, 1P); HR-MS  $m/z$ : Calcd for C<sub>13</sub>H<sub>19</sub>FO<sub>4</sub>P [M + H]<sup>+</sup> calcd. 289.1010 found 289.1001

**Diethyl (Z)-(2-([1,1'-biphenyl]-4-yl)-2-fluorovinyl)phosphonate (2f)**

The reaction was conducted on a 0.2 mmol scale following the general procedure. The desired product was purified by column chromatography (PE/EA 5:1) to give a colorless oil (46.1 mg, 69%).

<sup>1</sup>H NMR (400 MHz, CDCl<sub>3</sub>)  $\delta$  7.92 (d,  $J$  = 8.0 Hz, 2H), 7.68-7.61 (m, 4H), 7.49-7.45 (m, 2H), 7.41-7.37 (m, 1H), 5.52 (dd,  $J$  = 26.0, 3.2 Hz, 1H), 4.08-4.00 (m, 4H), 1.22 (t,  $J$  = 7.0 Hz, 6H); <sup>13</sup>C NMR (101 MHz, CDCl<sub>3</sub>)  $\delta$  169.6 (dd,  $J$  = 271.4, 26.1 Hz), 144.2, 140.1, 129.3 (d,  $J$  = 6.3 Hz), 129.1, 128.2, 127.3, 126.9, 95.0 (dd,  $J$  = 202.4, 22.8 Hz), 62.31, 62.25, 16.3, 16.2; <sup>19</sup>F (376 MHz, CDCl<sub>3</sub>)  $\delta$  -67.8 (dd,  $J$  = 72.9, 25.9 Hz, 1F); <sup>31</sup>P (162 MHz, CDCl<sub>3</sub>)  $\delta$  15.6 (d,  $J$  = 72.9 Hz, 1P); HR-MS  $m/z$ : Calcd for C<sub>18</sub>H<sub>21</sub>FO<sub>3</sub>P [M + H]<sup>+</sup> calcd. 335.1218 found 335.1209

**Diethyl (Z)-(2-fluoro-2-(4-fluorophenyl)vinyl)phosphonate (2g)**

The reaction was conducted on a 0.2 mmol scale following the general procedure. The desired product was purified by column chromatography (PE/EA 10:1) to give a colorless oil (42.5 mg, 77%).

<sup>1</sup>H NMR (400 MHz, CDCl<sub>3</sub>)  $\delta$  7.87-7.84 (m, 2H), 7.14-7.10 (m, 2H), 5.49 (dd,  $J$  = 25.6, 2.8 Hz, 1H), 4.06-3.97 (m, 4H), 1.22 (t,  $J$  = 7.0 Hz, 6H); <sup>13</sup>C NMR (101 MHz, CDCl<sub>3</sub>)  $\delta$  168.7 (dd,  $J$  = 271.6, 26.0 Hz), 164.6 (dd,  $J$  = 253.9, 1.1 Hz), 131.2 (ddd,  $J$  = 8.8, 6.3, 0.8 Hz), 126.6 (ddd,  $J$  = 29.5, 3.2, 1.6 Hz), 115.5 (d,  $J$  = 22.1 Hz), 95.2 (dd,  $J$  = 202.3, 22.6 Hz), 62.3, 62.2, 16.3, 16.2; <sup>19</sup>F (376 MHz, CDCl<sub>3</sub>) -107.43- -107.36 (m, 1F),  $\delta$  -66.8 (dd,  $J$  = 72.6, 25.6 Hz, 1F); <sup>31</sup>P (162 MHz, CDCl<sub>3</sub>)  $\delta$  15.3 (d,  $J$  = 72.6 Hz, 1P); HR-MS  $m/z$ : Calcd for C<sub>12</sub>H<sub>16</sub>F<sub>2</sub>O<sub>3</sub>P [M + H]<sup>+</sup> calcd. 277.0811 found 277.0800

**Diethyl (Z)-(2-fluoro-2-(3-fluorophenyl)vinyl)phosphonate (2h)**

The reaction was conducted on a 0.2 mmol scale following the general procedure. The desired product was purified by column chromatography (PE/EA 10:1) to give a colorless oil (44.1 mg, 80%).

<sup>1</sup>H NMR (400 MHz, CDCl<sub>3</sub>)  $\delta$  7.66 (d,  $J$  = 8.0 Hz, 1H), 7.54 (dt,  $J$  = 11.6, 1.6 Hz, 1H), 7.44-7.39 (m, 1H), 7.19 (td,  $J$  = 8.4, 2.4 Hz, 1H), 5.56 (dd,  $J$  = 25.6, 2.8 Hz, 1H), 4.08-3.99 (m, 4H), 1.22 (t,  $J$  = 7.2 Hz, 6H); <sup>13</sup>C NMR (101 MHz, CDCl<sub>3</sub>) 168.1 (ddd,  $J$  = 272.1, 25.5, 2.5 Hz), 162.2 (d,  $J$  = 247.8 Hz), 132.3 (ddd,  $J$  = 29.7, 8.2, 1.5 Hz), 130.8 (d,  $J$  = 8.8 Hz), 129.9 (d,  $J$  = 8.1 Hz), 124.8 (q,  $J$  = 2.3 Hz), 118.5 (d,  $J$  = 21.2 Hz), 115.8 (dd,  $J$  = 327.2, 21.6 Hz), 115.8 (dd,  $J$  = 24.0, 6.0 Hz), 96.4 (dd,  $J$  = 202.1, 21.9 Hz), 62.4, 62.3, 16.3, 16.2; <sup>19</sup>F (376 MHz, CDCl<sub>3</sub>) -112.27-112.20 (m, 1F),  $\delta$  -67.9 (dd,  $J$  = 71.8, 25.6 Hz, 1F); <sup>31</sup>P (162 MHz, CDCl<sub>3</sub>)  $\delta$  14.7 (d,  $J$  = 71.9 Hz, 1P);

HR-MS  $m/z$ : Calcd for  $C_{12}H_{16}F_2O_3P$   $[M + H]^+$  calcd. 277.0811 found 277.0796

**Diethyl (Z)-(2-(4-chlorophenyl)-2-fluorovinyl)phosphonate (2i)**

The reaction was conducted on a 0.2 mmol scale following the general procedure. The desired product was purified by column chromatography (PE/EA 10:1) to give a colorless oil (48.5 mg, 83%).

$^1H$  NMR (400 MHz,  $CDCl_3$ )  $\delta$  7.79 (d,  $J = 8.4$  Hz, 2H), 7.41 (d,  $J = 8.4$  Hz, 2H), 5.52 (dd,  $J = 26.0, 2.8$  Hz, 1H), 4.07-3.98 (m, 4H), 1.23 (t,  $J = 7.0$  Hz, 6H);  $^{13}C$  NMR (101 MHz,  $CDCl_3$ )  $\delta$  168.6 (dd,  $J = 271.6, 25.9$  Hz), 137.8, 130.2 (dd,  $J = 6.1, 0.8$  Hz), 128.8 (dd,  $J = 29.5, 1.7$  Hz), 128.6, 95.8 (dd,  $J = 202.0, 22.2$  Hz), 62.4, 62.3, 16.3, 16.2;  $^{19}F$  (376 MHz,  $CDCl_3$ )  $\delta$  -67.9 (dd,  $J = 71.8, 25.6$  Hz, 1F);  $^{31}P$  (162 MHz,  $CDCl_3$ )  $\delta$  15.0 (d,  $J = 72.1$  Hz, 1P); HR-MS  $m/z$ : Calcd for  $C_{12}H_{16}ClFO_3P$   $[M + H]^+$  calcd. 293.0515 found 293.0521

**Diethyl (Z)-(2-(3-chlorophenyl)-2-fluorovinyl)phosphonate (2j)**

The reaction was conducted on a 0.2 mmol scale following the general procedure. The desired product was purified by column chromatography (PE/EA 10:1) to give a colorless oil (41.5 mg, 71%).

$^1H$  NMR (400 MHz,  $CDCl_3$ )  $\delta$  7.79-7.74 (m, 2H), 7.47-7.45 (m, 1H), 7.40-7.36 (m, 1H), 5.56 (dd,  $J = 25.6, 2.0$  Hz, 1H), 4.07-3.97 (m, 4H), 1.23 (t,  $J = 7.0$  Hz, 6H);  $^{13}C$  NMR (101 MHz,  $CDCl_3$ )  $\delta$  168.1 (dd,  $J = 272.6, 25.4$  Hz), 134.3, 132.0 (dd,  $J = 29.4, 1.3$  Hz), 131.5, 129.6, 127.9 (dd,  $J = 160.5, 6.1$  Hz), 96.6 (dd,  $J = 202.1, 21.7$  Hz), 62.4, 62.4, 16.3, 16.2;  $^{19}F$  (376 MHz,  $CDCl_3$ )  $\delta$  -68.1 (dd,  $J = 71.4, 25.6$  Hz, 1F);  $^{31}P$  (162 MHz,  $CDCl_3$ )  $\delta$  14.7 (d,  $J = 71.6$  Hz, 1P); HR-MS  $m/z$ : Calcd for  $C_{12}H_{16}ClFO_3P$   $[M + H]^+$  calcd. 293.0515 found 293.0505

**Diethyl (Z)-(2-(2-chlorophenyl)-2-fluorovinyl)phosphonate (2k)**

The reaction was conducted on a 0.2 mmol scale following the general procedure. The desired product was purified by column chromatography (PE/EA 10:1) to give a colorless oil (32.7 mg, 56%).

$^1H$  NMR (400 MHz,  $CDCl_3$ )  $\delta$  7.57-7.56 (m, 1H), 7.46-7.40 (m, 2H), 7.35-7.31 (m, 1H), 5.68 (dd,  $J = 20.8, 5.2$  Hz, 1H), 4.02-3.86 (m, 4H), 1.17 (t,  $J = 7.2$  Hz, 6H);  $^{13}C$  NMR (101 MHz,  $CDCl_3$ )  $\delta$  168.1 (dd,  $J = 279.0, 24.8$  Hz), 133.3, 132.4, 132.1 (d,  $J = 2.3$  Hz), 130.5 (dd,  $J = 25.6, 1.7$  Hz), 129.6 (d,  $J = 1.9$  Hz), 99.4 (dd,  $J = 200.5, 19.7$  Hz), 62.14, 62.10, 16.22, 16.15;  $^{19}F$  (376 MHz,  $CDCl_3$ )  $\delta$  -69.1 (dd,  $J = 66.6, 21.1$  Hz, 1F);  $^{31}P$  (162 MHz,  $CDCl_3$ )  $\delta$  13.7 (d,  $J = 66.7$  Hz, 1P); HR-MS  $m/z$ : Calcd for  $C_{12}H_{16}ClFO_3P$   $[M + H]^+$  calcd. 293.0515 found 293.0507

**Diethyl (Z)-(2-(4-bromophenyl)-2-fluorovinyl)phosphonate (2l)**

The reaction was conducted on a 0.2 mmol scale following the general procedure. The

desired product was purified by column chromatography (PE/EA 10:1) to give a colorless oil (45.7 mg, 68%).

$^1\text{H}$  NMR (400 MHz,  $\text{CDCl}_3$ )  $\delta$  7.72 (d,  $J$  = 8.8 Hz, 2H), 7.57 (d,  $J$  = 8.8 Hz, 2H), 5.53 (dd,  $J$  = 25.6, 2.8 Hz, 1H), 4.07-3.98 (m, 4H), 1.23 (t,  $J$  = 7.0 Hz, 6H);  $^{13}\text{C}$  NMR (101 MHz,  $\text{CDCl}_3$ )  $\delta$  168.6 (dd,  $J$  = 271.7, 25.6 Hz), 131.6, 130.4 (dd,  $J$  = 6.1, 0.8 Hz), 129.2 (dd,  $J$  = 29.5, 1.7 Hz), 126.2 (d,  $J$  = 1.3 Hz), 96.0 (dd,  $J$  = 202.0, 22.2 Hz), 62.4, 62.3, 16.3, 16.2;  $^{19}\text{F}$  (376 MHz,  $\text{CDCl}_3$ )  $\delta$  -68.2 (dd,  $J$  = 71.8, 25.6 Hz, 1F);  $^{31}\text{P}$  (162 MHz,  $\text{CDCl}_3$ )  $\delta$  15.0 (d,  $J$  = 72.1 Hz, 1P); HR-MS  $m/z$ : Calcd for  $\text{C}_{12}\text{H}_{16}\text{BrFO}_3\text{P}$  [ $\text{M} + \text{H}$ ] $^+$  calcd. 336.9926 found 236.9941

**Diethyl (Z)-(2-fluoro-2-(4-(trifluoromethyl)phenyl)vinyl)phosphonate (2m)**

The reaction was conducted on a 0.2 mmol scale following the general procedure. The desired product was purified by column chromatography (PE/EA 10:1) to give a colorless oil (55.4 mg, 85%).

$^1\text{H}$  NMR (400 MHz,  $\text{CDCl}_3$ )  $\delta$  7.96 (d,  $J$  = 8.4 Hz, 2H), 7.70 (d,  $J$  = 8.0 Hz, 2H), 5.63 (dd,  $J$  = 25.6, 2.4 Hz, 1H), 4.07-4.00 (m, 4H), 1.22 (t,  $J$  = 7.2 Hz, 6H);  $^{13}\text{C}$  NMR (101 MHz,  $\text{CDCl}_3$ )  $\delta$  168.0 (dd,  $J$  = 272.5, 25.6 Hz), 133.4 (d,  $J$  = 66.4, 29.6 Hz), 129.3 (d,  $J$  = 5.6 Hz), 125.2 (q,  $J$  = 3.7 Hz), 123.7 (q,  $J$  = 273.8 Hz), 97.5 (dd,  $J$  = 201.6, 21.3 Hz), 62.5, 62.4, 16.3, 16.2;  $^{19}\text{F}$  (376 MHz,  $\text{CDCl}_3$ )  $\delta$  -63.2 (s, 1F), -68.2 (dd,  $J$  = 71.1, 25.6 Hz, 1F);  $^{31}\text{P}$  (162 MHz,  $\text{CDCl}_3$ )  $\delta$  14.3 (d,  $J$  = 71.1 Hz, 1P); HR-MS  $m/z$ : Calcd for  $\text{C}_{13}\text{H}_{16}\text{F}_4\text{O}_3\text{P}$  [ $\text{M} + \text{H}$ ] $^+$  calcd. 327.0779 found 327.0789

**Diethyl (Z)-(2-(4-cyanophenyl)-2-fluorovinyl)phosphonate (2n)**

The reaction was conducted on a 0.2 mmol scale following the general procedure. The desired product was purified by column chromatography (PE/EA 3:1) to give a colorless oil (39.1 mg, 69%).

$^1\text{H}$  NMR (400 MHz,  $\text{CDCl}_3$ )  $\delta$  7.97 (d,  $J$  = 8.4 Hz, 2H), 7.73 (d,  $J$  = 8.0 Hz, 2H), 5.66 (dd,  $J$  = 25.6, 2.0 Hz, 1H), 4.07-3.99 (m, 4H), 3.95 (s, 3H), 1.21 (t,  $J$  = 7.2 Hz, 6H);  $^{13}\text{C}$  NMR (101 MHz,  $\text{CDCl}_3$ )  $\delta$  168.8 (d,  $J$  = 348.45 Hz), 134.1, 131.8, 129.3 (d,  $J$  = 5.05 Hz), 117.9, 114.8, 98.1 (dd,  $J$  = 201.0, 21.2 Hz), 62.42, 62.36, 16.14, 16.07;  $^{19}\text{F}$  (376 MHz,  $\text{CDCl}_3$ )  $\delta$  -69.6 (dd,  $J$  = 70.3, 25.6 Hz, 1F);  $^{31}\text{P}$  (162 MHz,  $\text{CDCl}_3$ )  $\delta$  14.3 (d,  $J$  = 71.1 Hz, 1P); HR-MS  $m/z$ : Calcd for  $\text{C}_{13}\text{H}_{16}\text{FNO}_3\text{P}$  [ $\text{M} + \text{H}$ ] $^+$  calcd. 284.0857 found 284.0861

**Methyl (Z)-4-(2-(diethoxyphosphoryl)-1-fluorovinyl)benzoate (2o)**

The reaction was conducted on a 0.2 mmol scale following the general procedure. The desired product was purified by column chromatography (PE/EA 1:1) to give a colorless oil (46.8 mg, 74%).

$^1\text{H}$  NMR (400 MHz,  $\text{CDCl}_3$ )  $\delta$  8.10 (d,  $J$  = 8.4 Hz, 2H), 7.91 (d,  $J$  = 8.4 Hz, 2H), 5.61

(dd,  $J = 25.6, 2.8$  Hz, 1H), 4.08-4.01(m, 4H), 1.24 (t,  $J = 7.0$  Hz, 6H);  $^{13}\text{C}$  NMR (101 MHz,  $\text{CDCl}_3$ )  $\delta$  168.4 (dd,  $J = 272.5, 25.5$  Hz), 166.3, 134.4 (dd,  $J = 28.0, 1.1$  Hz), 132.6, 129.3, 128.9 (d,  $J = 5.8$  Hz), 97.2 (dd,  $J = 202.0, 21.7$  Hz), 62.4, 62.3, 52.5, 16.3, 16.2;  $^{19}\text{F}$  (376 MHz,  $\text{CDCl}_3$ )  $\delta$  -68.3 (dd,  $J = 71.4, 25.6$  Hz, 1F);  $^{31}\text{P}$  (162 MHz,  $\text{CDCl}_3$ )  $\delta$  14.5 (d,  $J = 71.4\text{Hz}$ , 1P); HR-MS  $m/z$ : Calcd for  $\text{C}_{14}\text{H}_{19}\text{FO}_5\text{P}$   $[\text{M} + \text{H}]^+$  calcd. 317.0960 found 317.0957

#### **Diethyl (Z)-(1-fluoro-1-phenylprop-1-en-2-yl)phosphonate (2p)**

The reaction was conducted on a 0.2 mmol scale following the general procedure. The desired product was purified by column chromatography (PE/EA 3:1) to give a colorless oil (32.6 mg, 60%).

$^1\text{H}$  NMR (400 MHz,  $\text{CDCl}_3$ )  $\delta$  7.60 (d,  $J = 7.2$  Hz, 2H), 7.45-7.37 (m, 3H), 4.00-3.82 (m, 4H), 2.05-2.01 (m, 3H), 1.12 (td,  $J = 6.8, 1.2$  Hz, 6H);  $^{13}\text{C}$  NMR (101 MHz,  $\text{CDCl}_3$ )  $\delta$  165.2 (dd,  $J = 270.4, 33.5$  Hz), 132.1 (d,  $J = 28.9$  Hz), 130.4, 129.4, 129.3, 127.8, 104.8 (dd,  $J = 193.1, 17.8$  Hz), 61.94, 61.88, 16.1, 16.0, 12.5 (dd,  $J = 9.9, 5.1$  Hz);  $^{19}\text{F}$  (376 MHz,  $\text{CDCl}_3$ )  $\delta$  -67.8 (d,  $J = 54.1$  Hz, 1F);  $^{31}\text{P}$  (162 MHz,  $\text{CDCl}_3$ )  $\delta$  18.7 (d,  $J = 53.8$  Hz, 1P); HR-MS  $m/z$ : Calcd for  $\text{C}_{13}\text{H}_{19}\text{FO}_3\text{P}$   $[\text{M} + \text{H}]^+$  calcd. 273.1061 found 273.1060

#### **Diethyl (Z)-(1-fluoro-1-phenylbut-1-en-2-yl)phosphonate (2q)**

The reaction was conducted on a 0.2 mmol scale following the general procedure. The desired product was purified by column chromatography (PE/EA 3:1) to give a colorless oil (29.2 mg, 51%).

$^1\text{H}$  NMR (400 MHz,  $\text{CDCl}_3$ )  $\delta$  7.61 (d,  $J = 7.2$  Hz, 2H), 7.43-7.39 (m, 3H), 3.99-3.84 (m, 4H), 2.52-2.46 (m, 2H), 1.22 (t,  $J = 7.4$  Hz, 3H) 1.11 (t,  $J = 7.0$  Hz, 6H);  $^{13}\text{C}$  NMR (101 MHz,  $\text{CDCl}_3$ )  $\delta$  165.7 (dd,  $J = 270.5, 34.4$  Hz), 132.2 (dd,  $J = 28.9, 1.6$  Hz), 130.4 (d,  $J = 2.1$  Hz), 129.4 (dd,  $J = 3.8, 0.9$  Hz), 127.8, 111.3 (dd,  $J = 190.0, 6.8$  Hz), 61.9, 61.8, 21.0 (dd,  $J = 8.2, 5.2$  Hz), 16.14, 16.07, 14.3;  $^{19}\text{F}$  (376 MHz,  $\text{CDCl}_3$ )  $\delta$  -70.4 (d,  $J = 55.6$  Hz, 1F);  $^{31}\text{P}$  (162 MHz,  $\text{CDCl}_3$ )  $\delta$  19.2 (d,  $J = 55.9$  Hz, 1P); HR-MS  $m/z$ : Calcd for  $\text{C}_{14}\text{H}_{21}\text{FO}_3\text{P}$   $[\text{M} + \text{H}]^+$  calcd. 287.1218 found 287.1219

#### **Dimethyl (Z)-(2-fluoro-2-phenylvinyl)phosphonate (3a)**

The reaction was conducted on a 0.2 mmol scale following the general procedure. The desired product was purified by column chromatography (PE/EA 5:1) to give a colorless oil (34.5 mg, 75%).

$^1\text{H}$  NMR (400 MHz,  $\text{CDCl}_3$ )  $\delta$  7.81 (d,  $J = 7.6$  Hz, 2H), 7.52-7.42 (m, 3H), 5.48 (dd,  $J = 25.2, 2.0$  Hz, 1H), 3.63 (d,  $J = 11.6\text{Hz}$ , 6H);  $^{13}\text{C}$  NMR (101 MHz,  $\text{CDCl}_3$ )  $\delta$  170.4 (dd,  $J = 273.4, 26.6$  Hz), 131.7, 130.2 (d,  $J = 28.8$  Hz), 128.7 (d,  $J = 6.1$  Hz), 128.3, 93.8 (dd,  $J = 203.7, 23.3$  Hz), 52.72, 52.66;  $^{19}\text{F}$  (376 MHz,  $\text{CDCl}_3$ )  $\delta$  -65.8 (dd,  $J =$



72.9, 25.2 Hz, 1F);  $^{31}\text{P}$  (162 MHz,  $\text{CDCl}_3$ )  $\delta$  18.5 (d,  $J$  = 73.4 Hz, 1P); HR-MS  $m/z$ : Calcd for  $\text{C}_{10}\text{H}_{13}\text{FO}_3\text{P}$   $[\text{M} + \text{H}]^+$  calcd. 231.0592 found 231.0595

**Dimethyl (Z)-(2-fluoro-2-(*p*-tolyl)vinyl) phosphonate (3b)**

The reaction was conducted on a 0.2 mmol scale following the general procedure. The desired product was purified by column chromatography (PE/EA 5:1) to give a colorless oil (29.3 mg, 60%).

$^1\text{H}$  NMR (400 MHz,  $\text{CDCl}_3$ )  $\delta$  7.71 (d,  $J$  = 8.4 Hz, 2H),  $\delta$  7.24 (d,  $J$  = 8.0 Hz, 2H), 5.42 (dd,  $J$  = 25.2, 3.2 Hz, 1H), 3.64 (d,  $J$  = 11.6 Hz, 6H) 2.40 (s, 3H);  $^{13}\text{C}$  NMR (101 MHz,  $\text{CDCl}_3$ )  $\delta$  170.6 (dd,  $J$  = 272.7, 26.8 Hz), 142.2, 129.0, 128.6 (d,  $J$  = 6.3 Hz), 127.3 (dd,  $J$  = 28.8, 1.5 Hz), 92.8 (dd,  $J$  = 204.0, 23.9 Hz), 52.7, 52.6, 21.7;  $^{19}\text{F}$  (376 MHz,  $\text{CDCl}_3$ )  $\delta$  -65.9 (dd,  $J$  = 74.1, 25.6 Hz, 1F);  $^{31}\text{P}$  (162 MHz,  $\text{CDCl}_3$ )  $\delta$  18.9 (d,  $J$  = 74.0 Hz, 1P); HR-MS  $m/z$ : Calcd for  $\text{C}_{11}\text{H}_{15}\text{FO}_3\text{P}$   $[\text{M} + \text{H}]^+$  calcd. 245.0748 found 245.0743

**Dimethyl (Z)-(2-fluoro-2-(4-fluorophenyl)vinyl) phosphonate (3c)**

The reaction was conducted on a 0.2 mmol scale following the general procedure. The desired product was purified by column chromatography (PE/EA 5:1) to give a colorless oil (34.2 mg, 69%).

$^1\text{H}$  NMR (400 MHz,  $\text{CDCl}_3$ )  $\delta$  7.66 (d,  $J$  = 7.6 Hz, 1H), 7.52 (d,  $J$  = 9.2 Hz, 1H),  $\delta$  7.45-7.40 (m, 1H), 7.22-7.18 (m, 1H), 5.57-5.51 (m, 1H), 3.67 (d,  $J$  = 11.2 Hz, 6H);  $^{13}\text{C}$  NMR (100 MHz,  $\text{CDCl}_3$ )  $\delta$  168.6 (ddd,  $J$  = 271.8, 25.9, 2.6 Hz), 162.3 (d,  $J$  = 248.1 Hz), 132.1 (ddd,  $J$  = 29.3, 8.2, 1.6 Hz), 130.0 (d,  $J$  = 8.2 Hz), 124.7 (dd,  $J$  = 6.0, 3.1 Hz), 118.7 (d,  $J$  = 21.2 Hz), 115.6 (dd,  $J$  = 24.0, 6.2 Hz), 95.1 (dd,  $J$  = 203.2, 22.6 Hz), 52.8, 52.7;  $^{19}\text{F}$  (376 MHz,  $\text{CDCl}_3$ )  $\delta$  -112.0 (m, 1F), -66.7 (dd,  $J$  = 72.2, 25.2 Hz, 1F);  $^{31}\text{P}$  (162 MHz,  $\text{CDCl}_3$ )  $\delta$  17.1 (d,  $J$  = 72.3 Hz, 1P); HR-MS  $m/z$ : Calcd for  $\text{C}_{10}\text{H}_{12}\text{F}_2\text{O}_3\text{P}$   $[\text{M} + \text{H}]^+$  calcd. 249.0498 found 249.0501

**Dimethyl (Z)-(2-(4-bromophenyl)-2-fluorovinyl)phosphonate (3d)**

The reaction was conducted on a 0.2 mmol scale following the general procedure. The desired product was purified by column chromatography (PE/EA 5:1) to give a colorless oil (44.4 mg, 72%).

$^1\text{H}$  NMR (400 MHz,  $\text{CDCl}_3$ )  $\delta$  7.96 (d,  $J$  = 8.4 Hz, 2H),  $\delta$  7.74 (d,  $J$  = 8.4 Hz, 2H), 5.64 (dd,  $J$  = 25.6, 2.0 Hz, 1H), 3.68 (d,  $J$  = 11.6 Hz, 6H);  $^{13}\text{C}$  NMR (101 MHz,  $\text{CDCl}_3$ )  $\delta$  167.9 (dd,  $J$  = 272.9, 26.1 Hz), 134.2 (d,  $J$  = 29.4, 1.7 Hz), 132.1, 129.4 (d,  $J$  = 6.0, 0.7 Hz), 96.9 (dd,  $J$  = 202.1, 21.8 Hz), 52.94, 52.88;  $^{19}\text{F}$  (376 MHz,  $\text{CDCl}_3$ )  $\delta$  -68.1 (dd,  $J$  = 71.1, 25.2 Hz, 1F);  $^{31}\text{P}$  (162 MHz,  $\text{CDCl}_3$ )  $\delta$  16.8 (d,  $J$  = 71.1 Hz, 1P); HR-MS  $m/z$ : Calcd for  $\text{C}_{10}\text{H}_{12}\text{BrFO}_3\text{P}$   $[\text{M} + \text{H}]^+$  calcd. 308.9613 found 308.9625

## 2.1 Gram-scale reaction

In a vial, **1a** (816 mg, 8 mmol), Selectfluor<sup>®</sup> (5.6 g, 16 mmol), diethyl phosphonate (2.2 mg, 16 mmol), and silver acetate (132 mg, 0.8 mmol) were dissolved in DEC/H<sub>2</sub>O 25 mL:25 mL. The resulting mixture was stirred under N<sub>2</sub> atmosphere at 60 °C for 48 h. After completion, the reaction was quenched and the residual oil was purified by column chromatography on silica gel, affording the product **2a** (1.4 g, yield 67%).

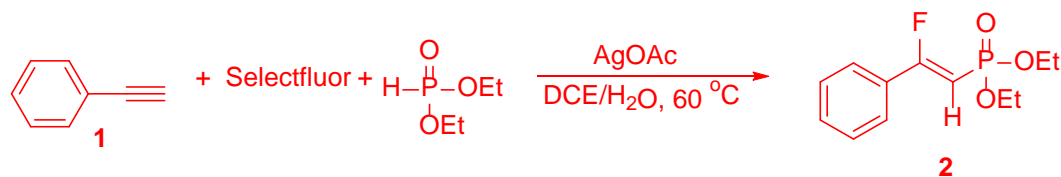

## 3 References

1. Okoromoba, O. -E.; Han, J. -B.; Hammond, G. B.; Xu, B. J. Am. Chem. Soc. **2014**, 136, 14381-14384
2. Xu, J.-J.; Burton, D.-J. J.Org.Chem. **2006**, 71, 3743-3747

## 4 Copies of NMR spectra

### Diethyl (Z)-(2-fluoro-2-phenylvinyl)phosphonate (2a)

$^1\text{H}$  NMR

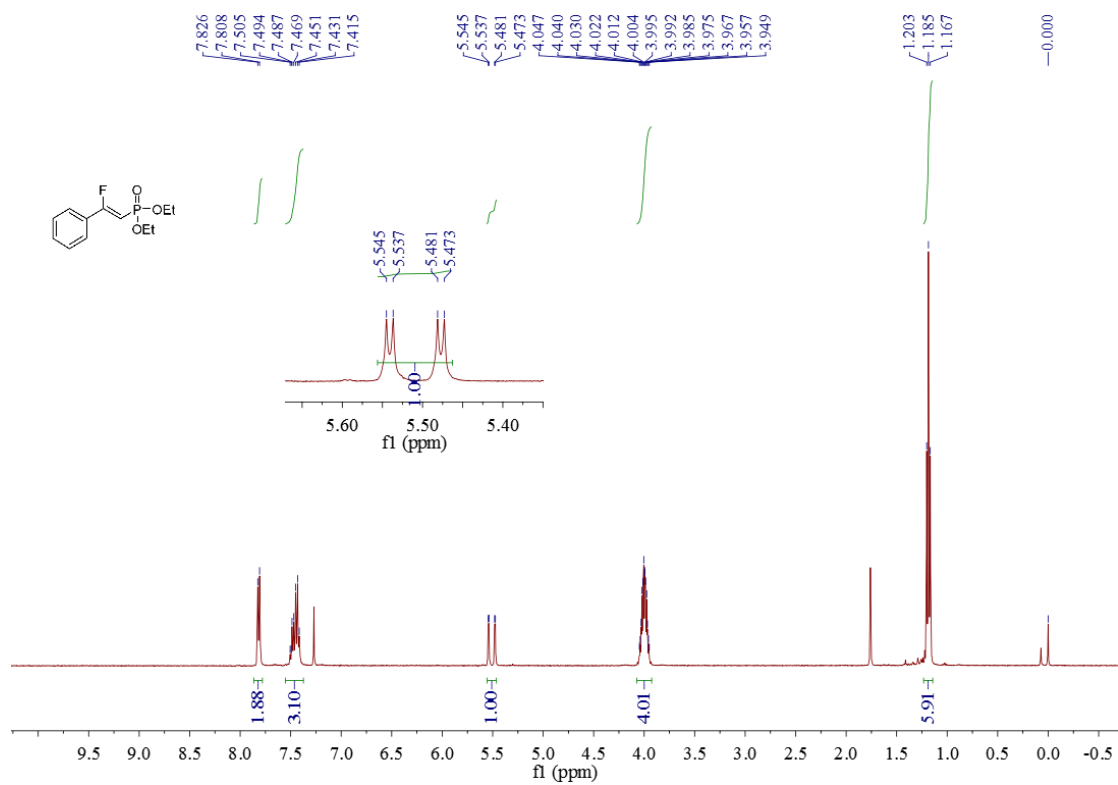

# <sup>13</sup>C NMR

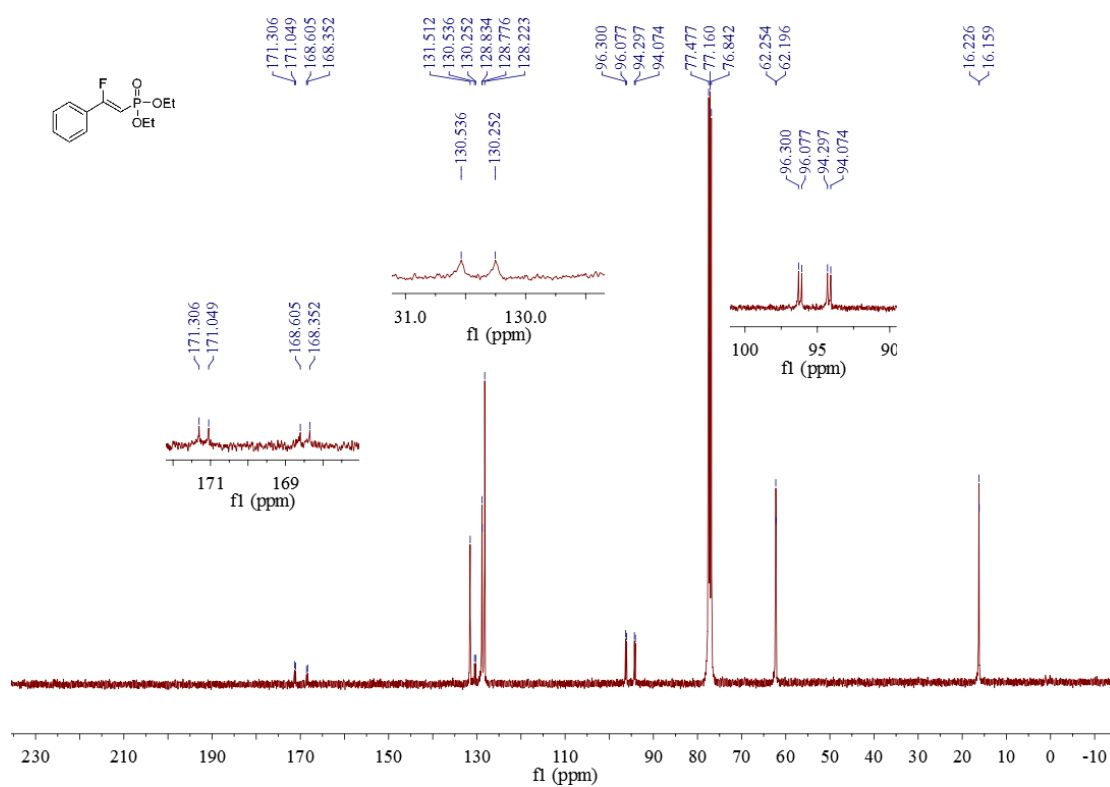

# <sup>19</sup>F NMR

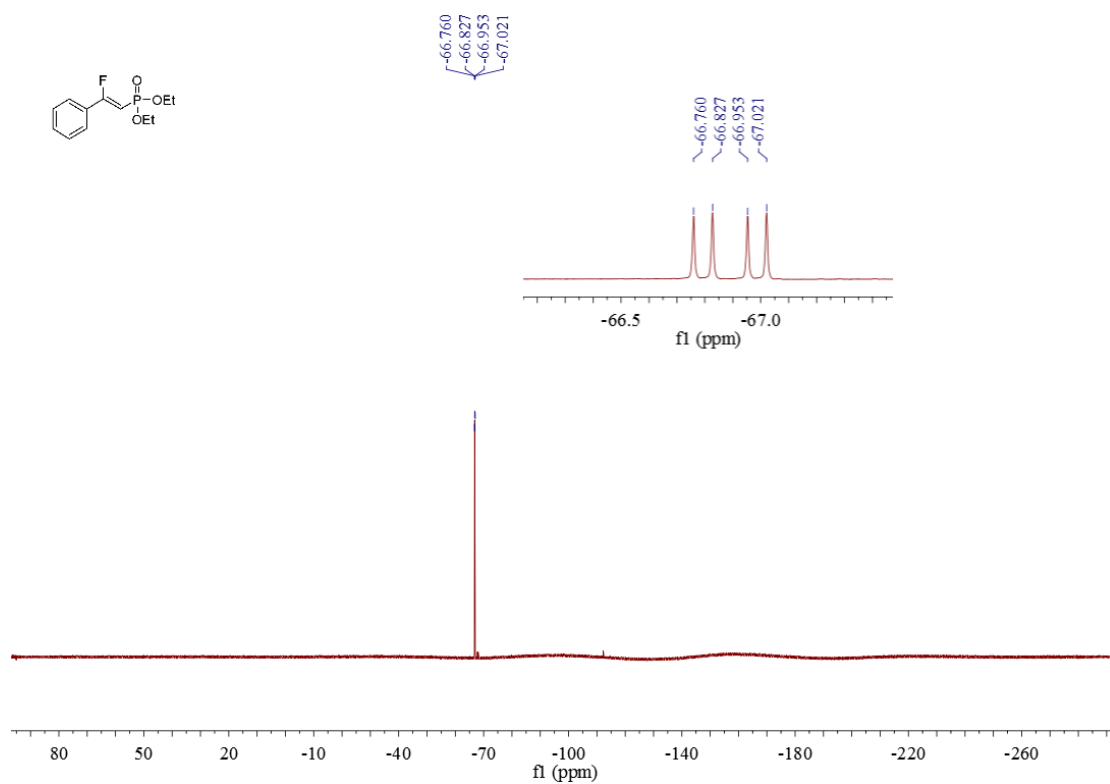

<sup>31</sup>P NMR

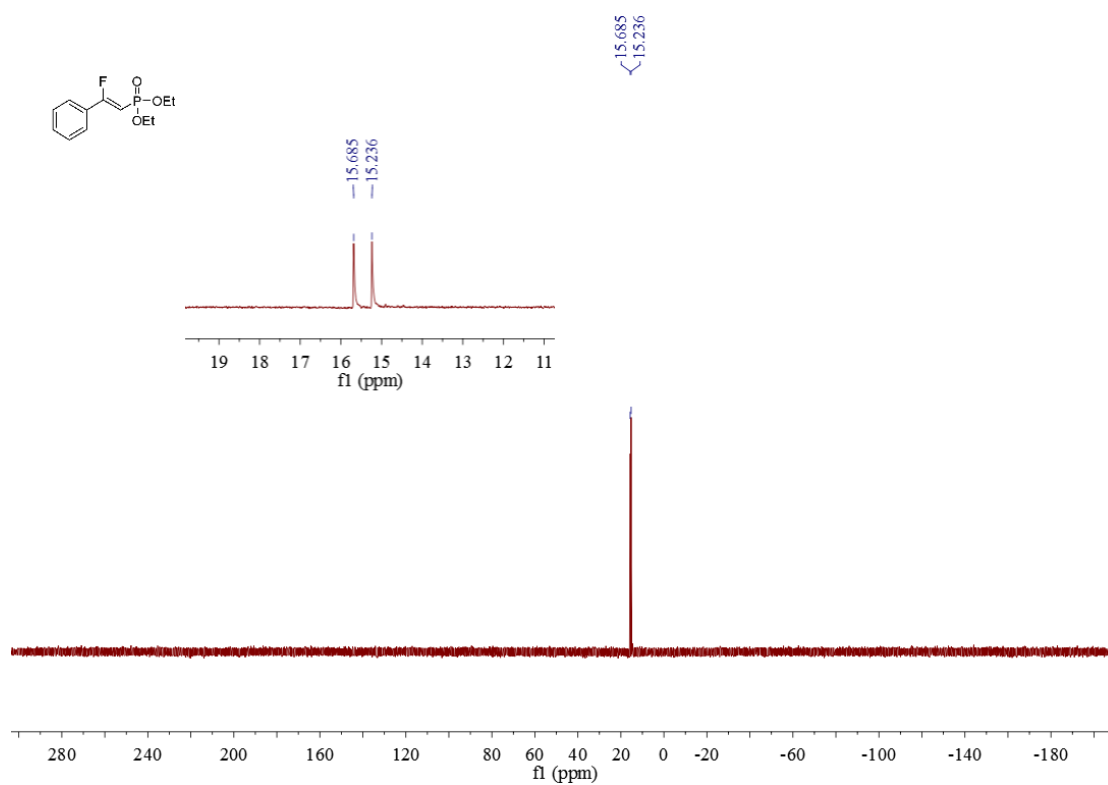

Diethyl (Z)-(2-fluoro-2-(*p*-tolyl)vinyl)phosphonate (2b)

<sup>1</sup>H NMR

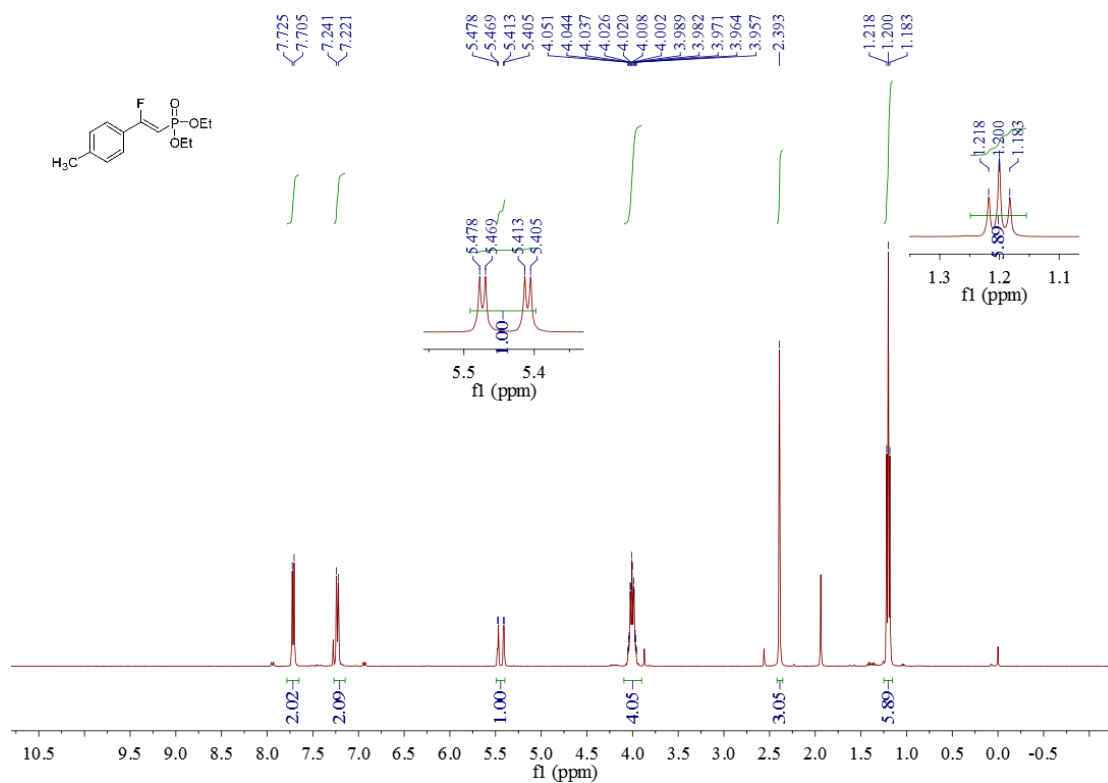

# <sup>13</sup>C NMR

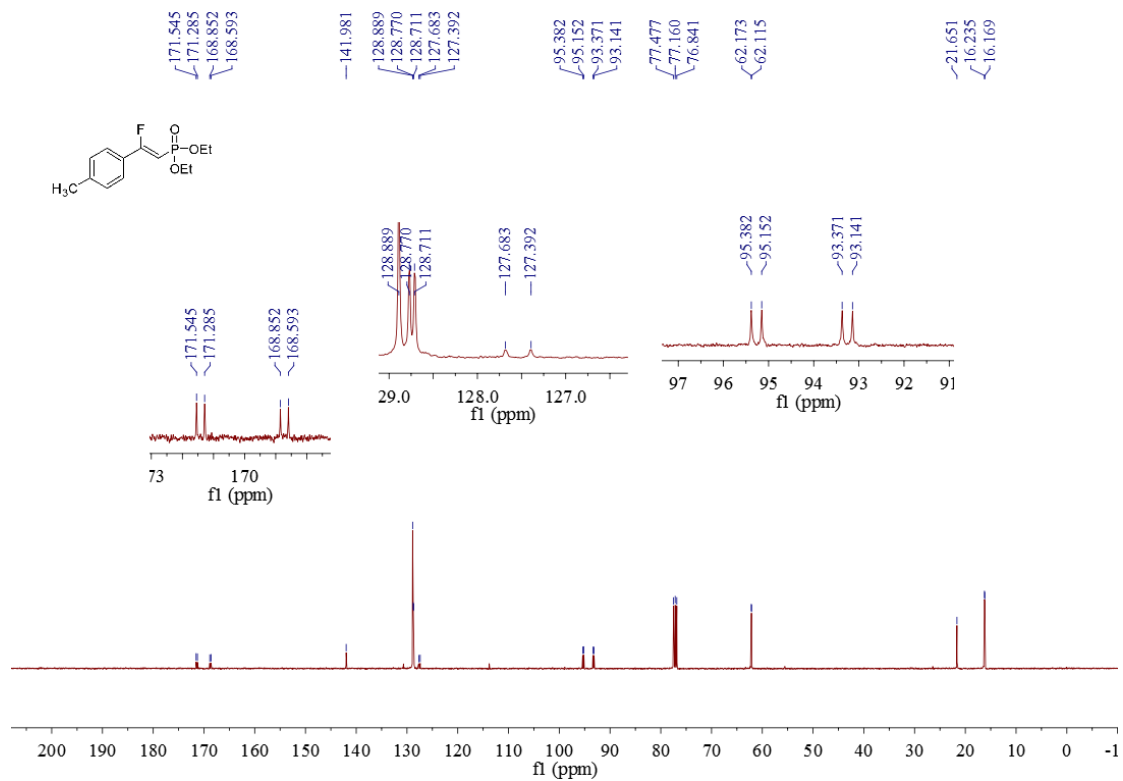

# <sup>19</sup>F NMR

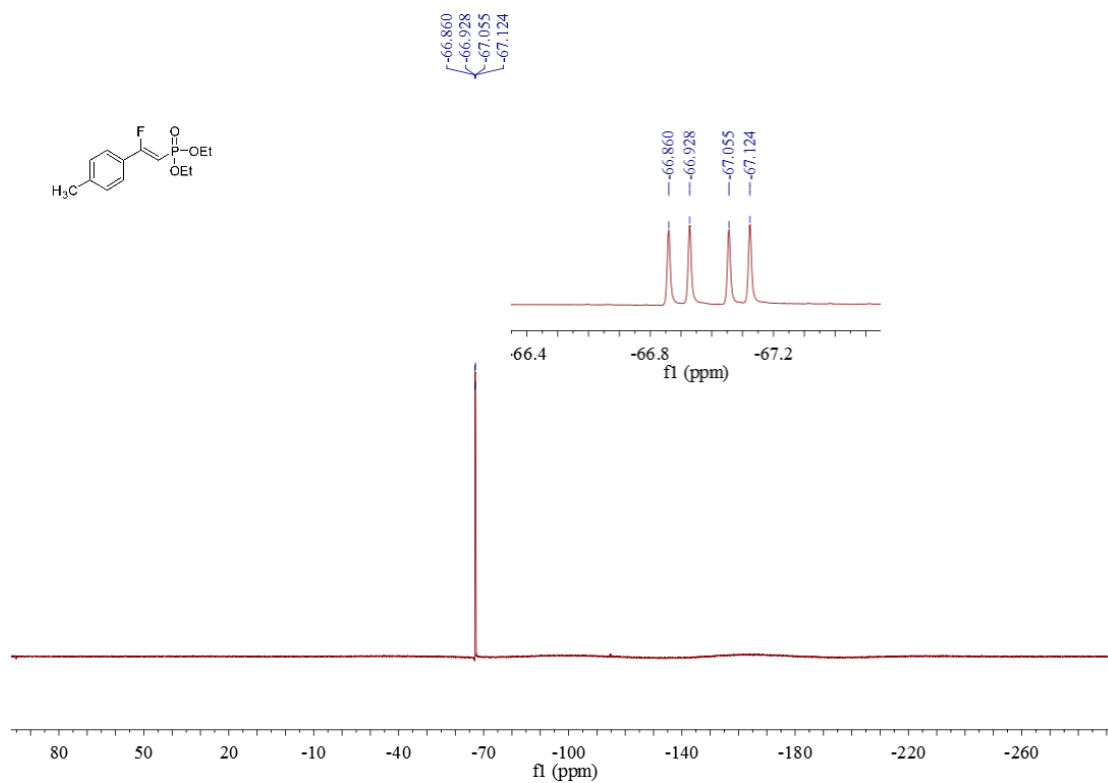

<sup>31</sup>P NMR

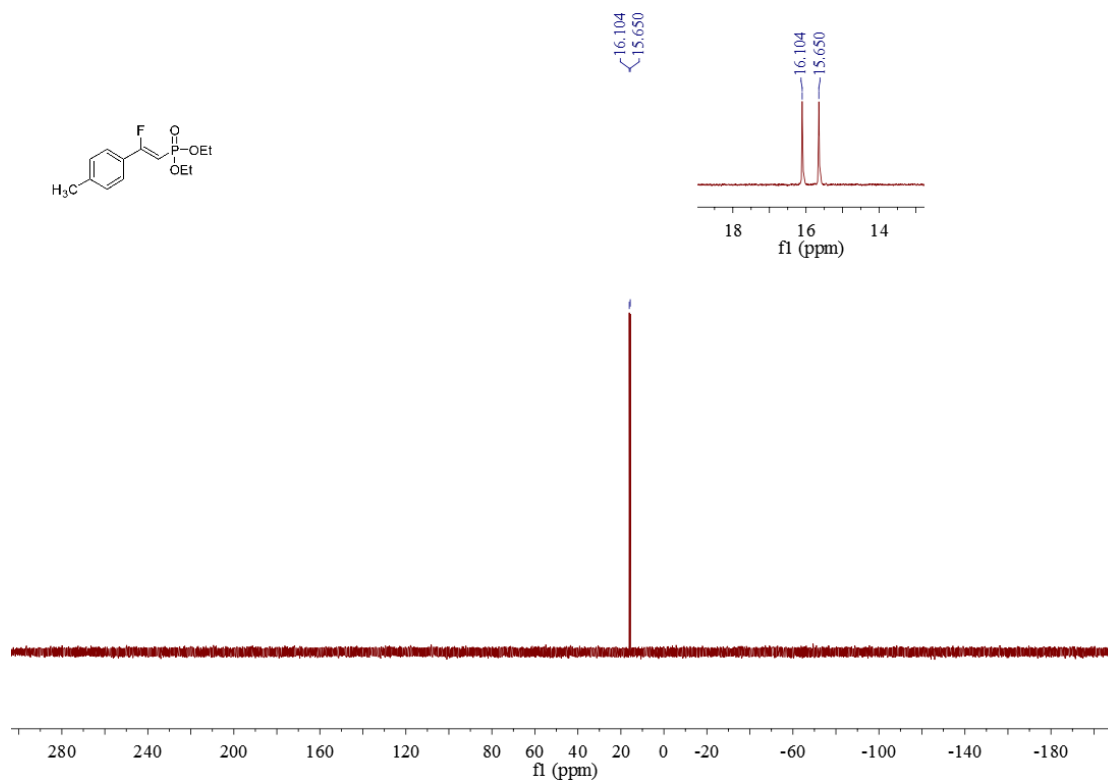

Diethyl (Z)-(2-fluoro-2-(*m*-tolyl)vinyl)phosphonate (2c)

<sup>1</sup>H NMR

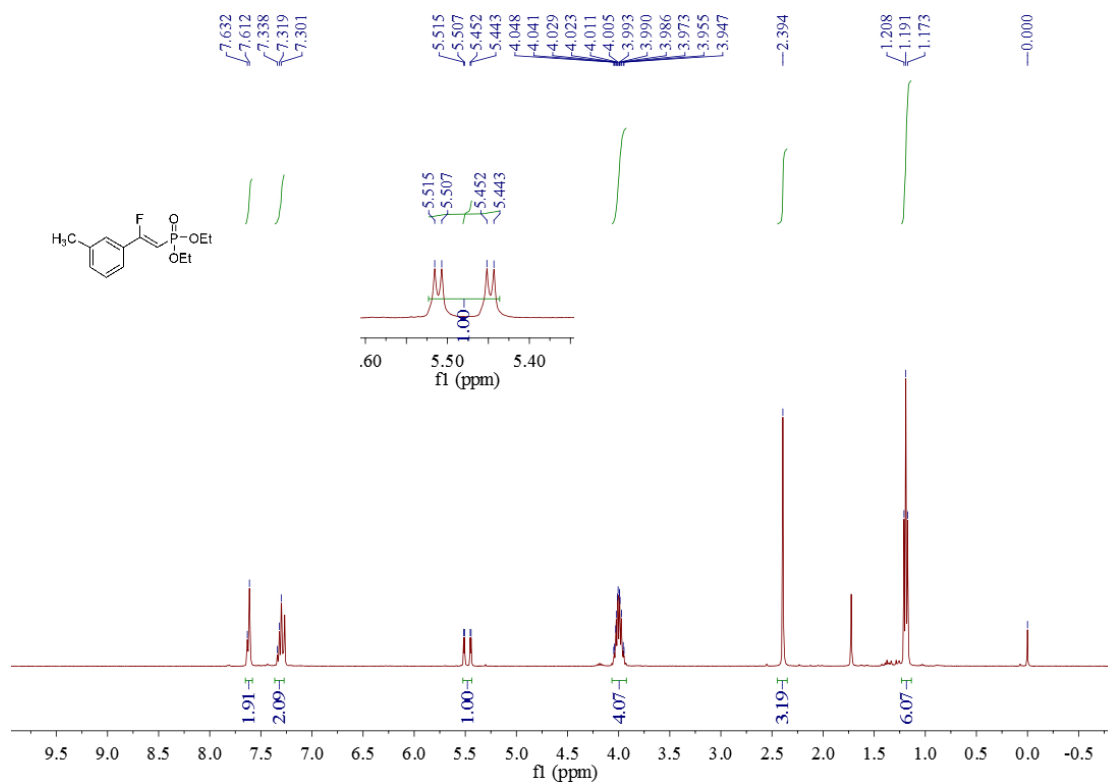

# <sup>13</sup>C NMR

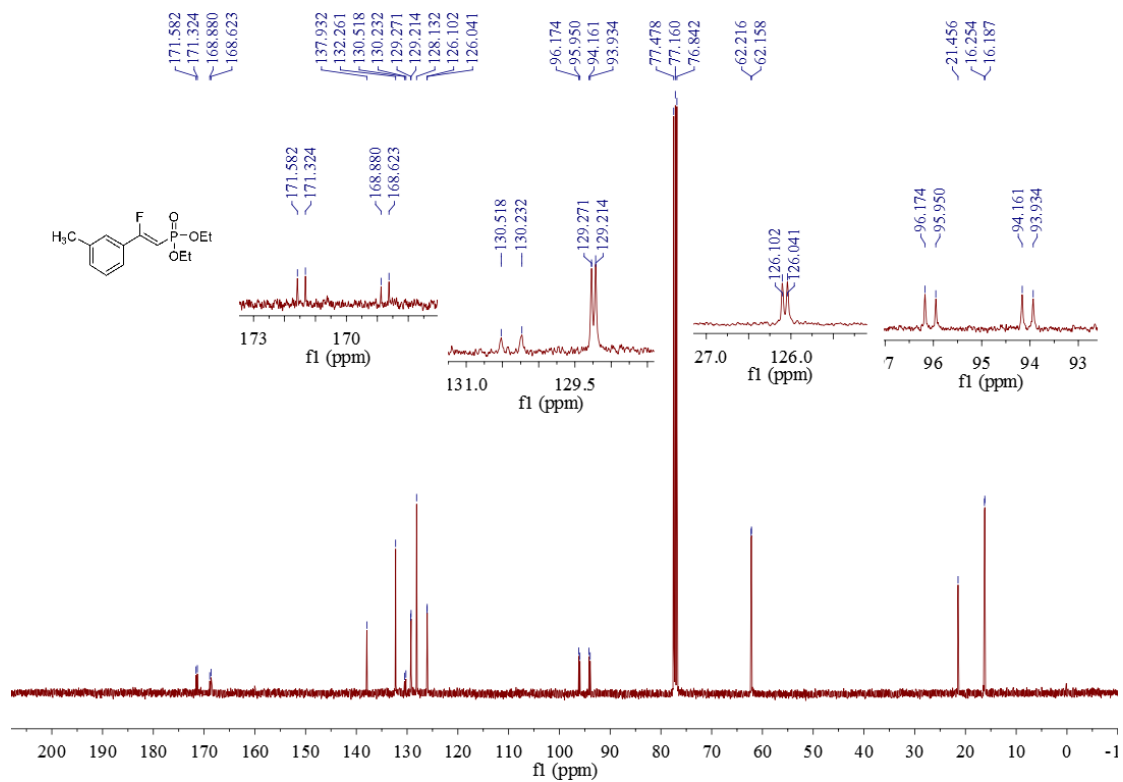

# <sup>19</sup>F NMR

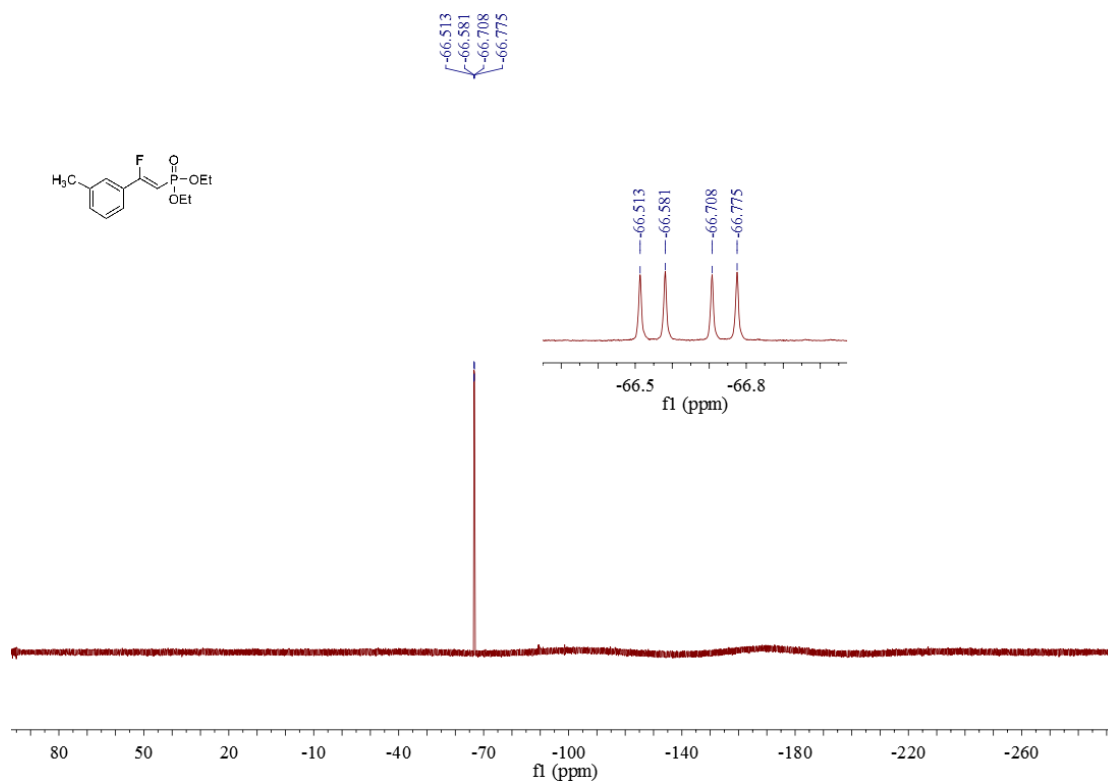



<sup>31</sup>P NMR

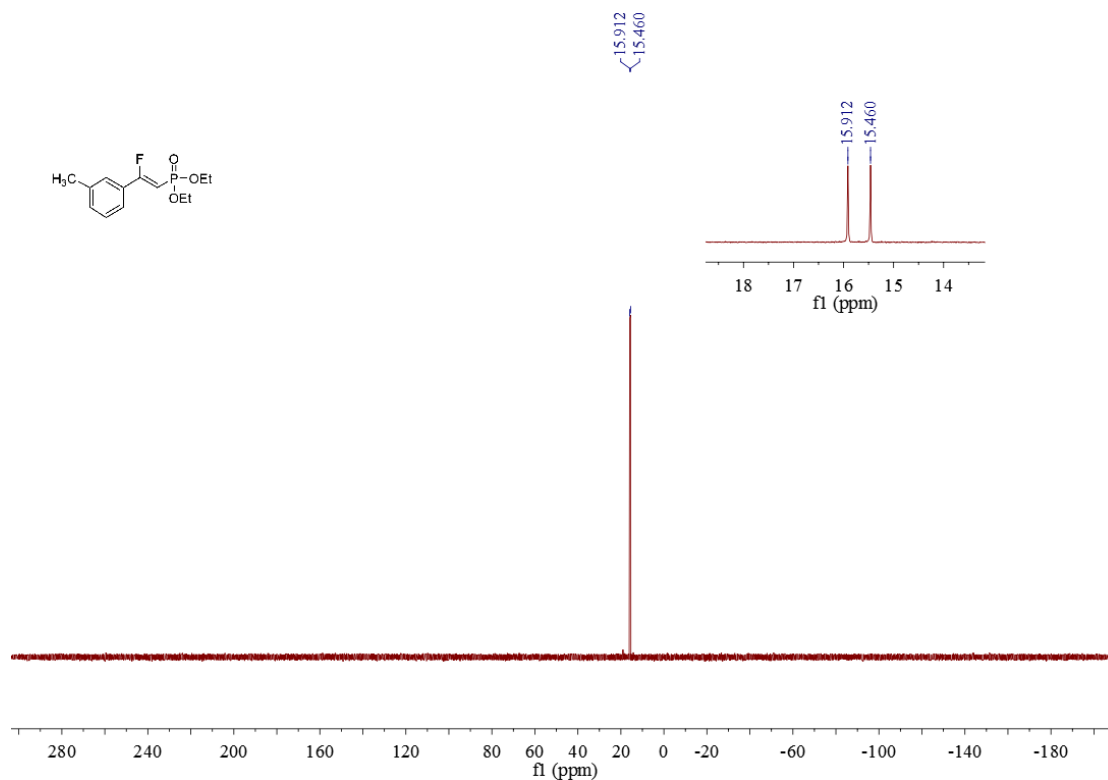

Diethyl (Z)-2-(4-(tert-butyl)phenyl)-2-fluorovinylphosphonate (2d)

<sup>1</sup>H NMR

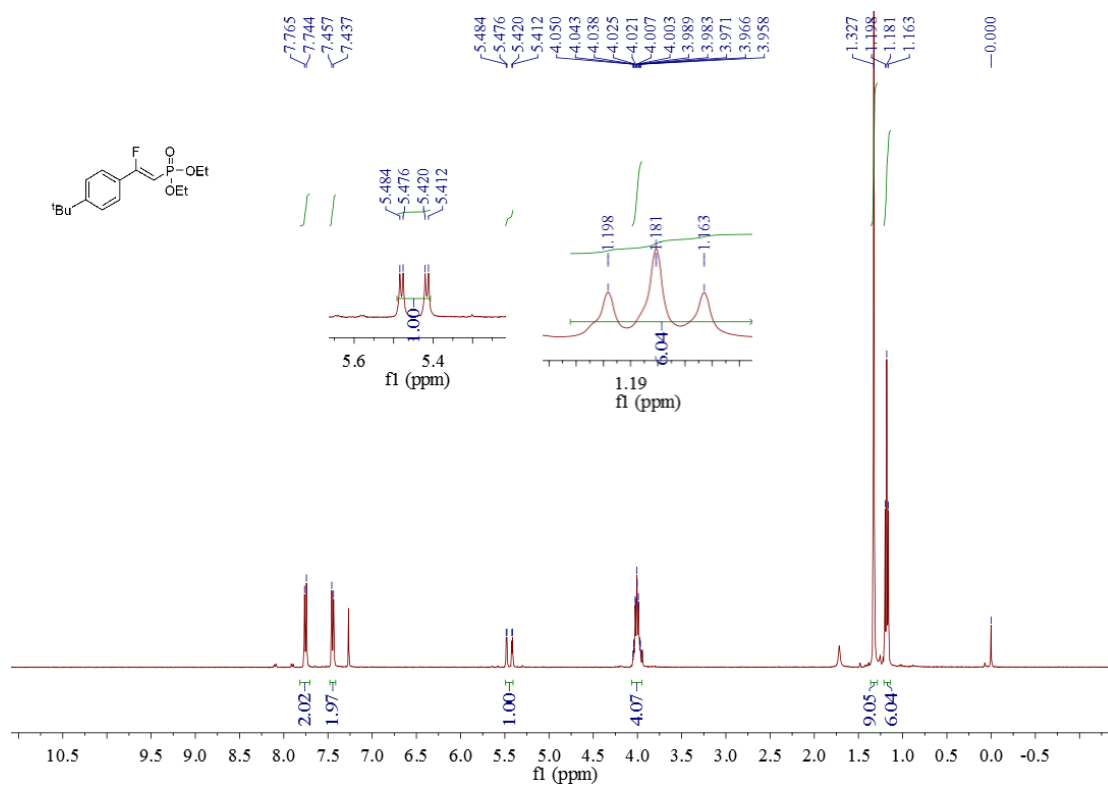

<sup>13</sup>C NMR

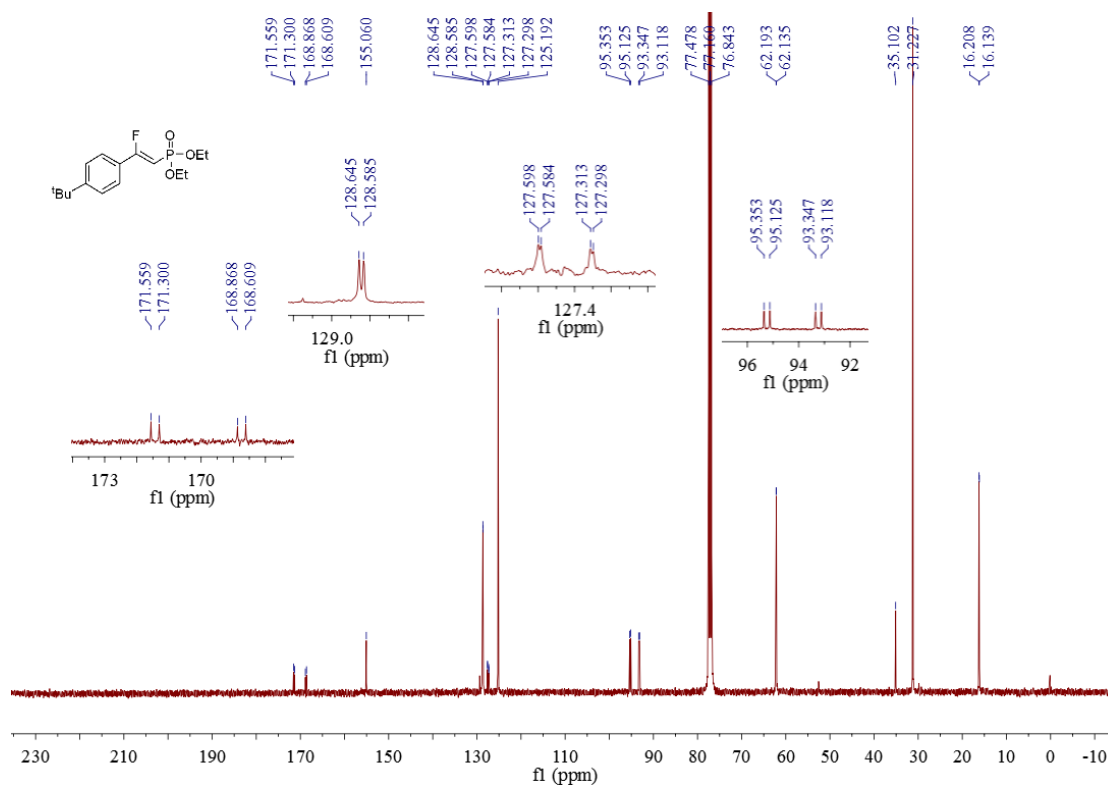

<sup>19</sup>F NMR

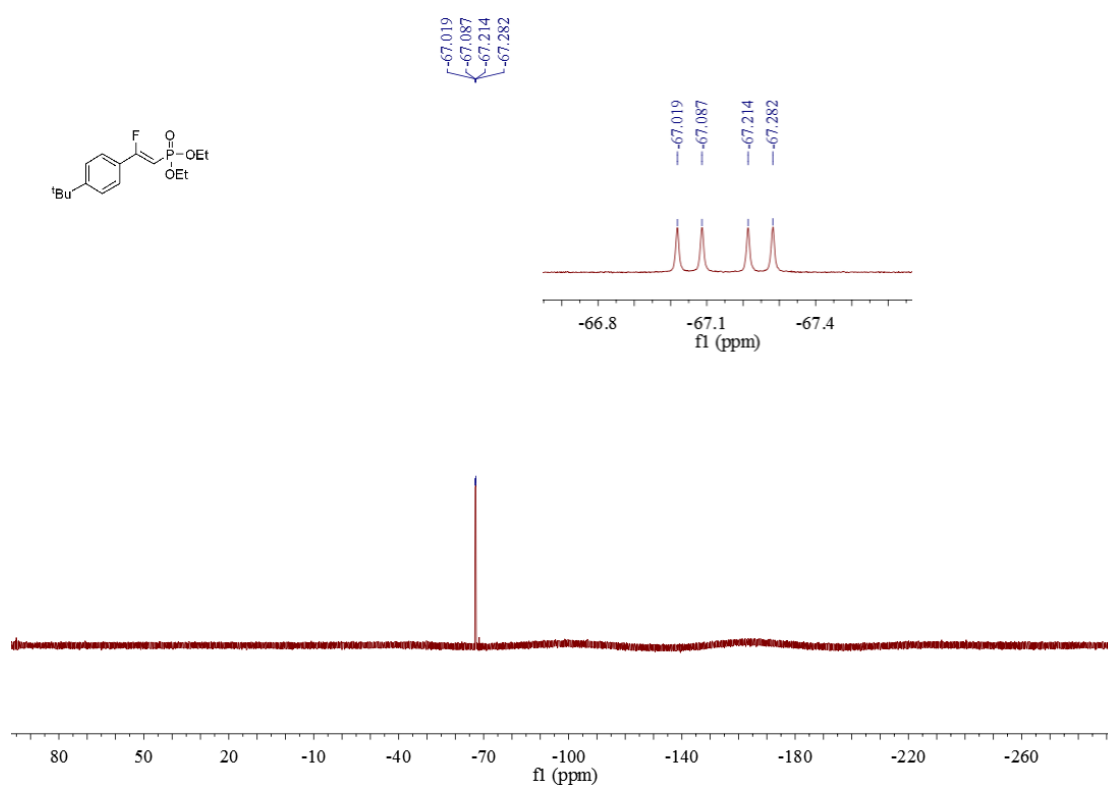

<sup>31</sup>P NMR

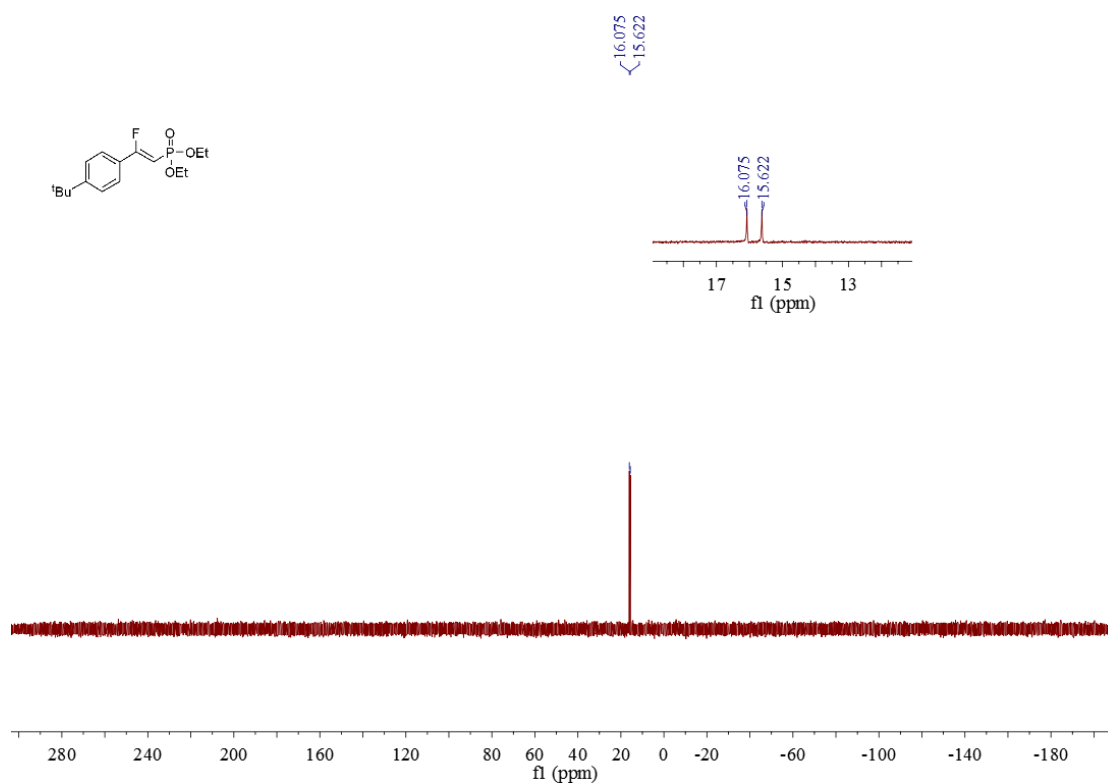

Diethyl (Z)-2-fluoro-2-(4-methoxyphenyl)vinylphosphonate (2e)

<sup>1</sup>H NMR

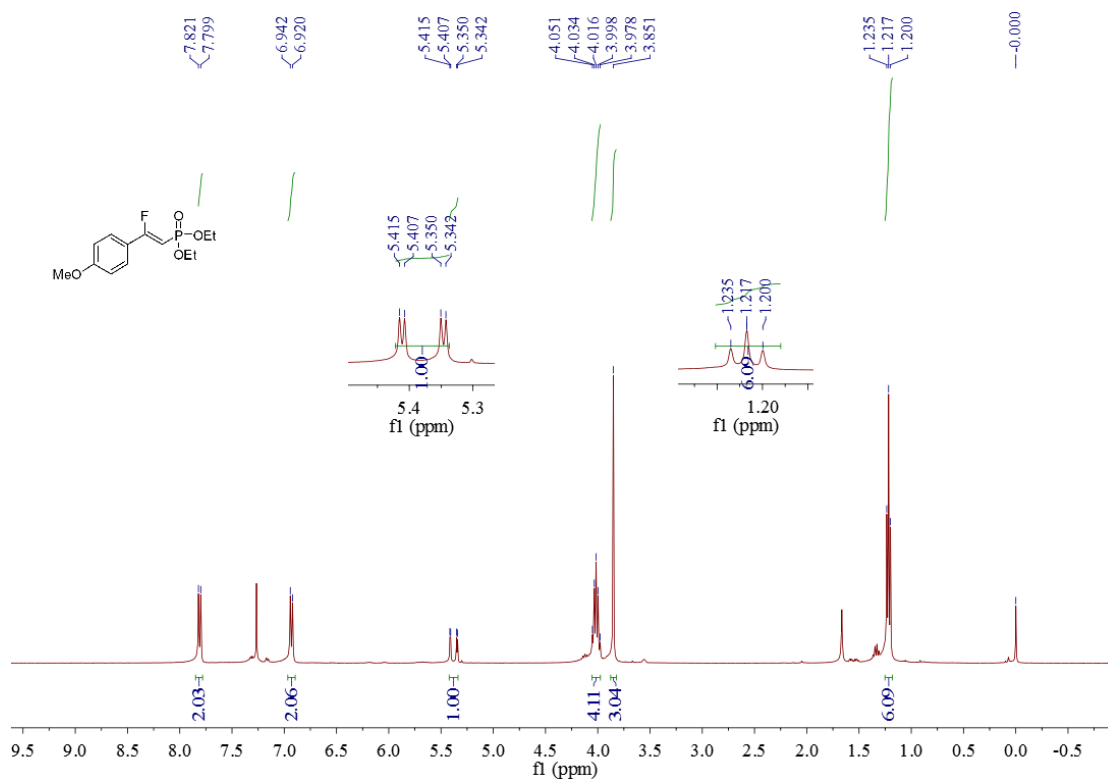

# <sup>13</sup>C NMR

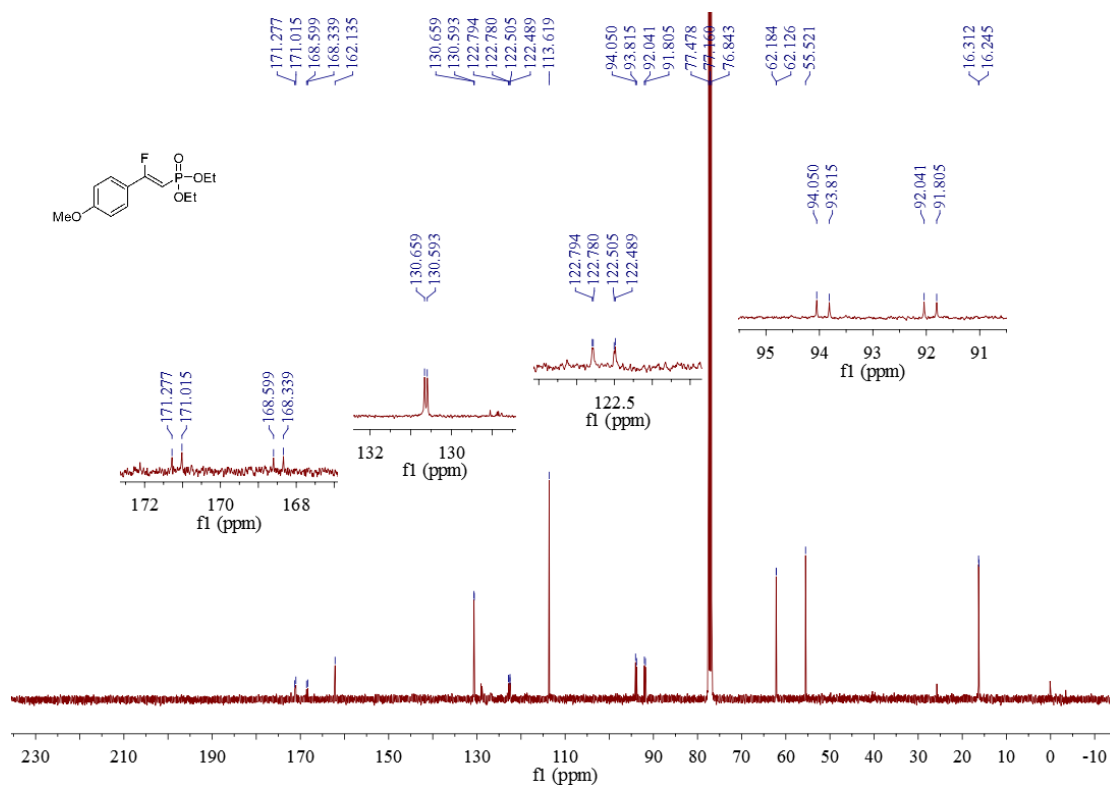

# <sup>19</sup>F NMR

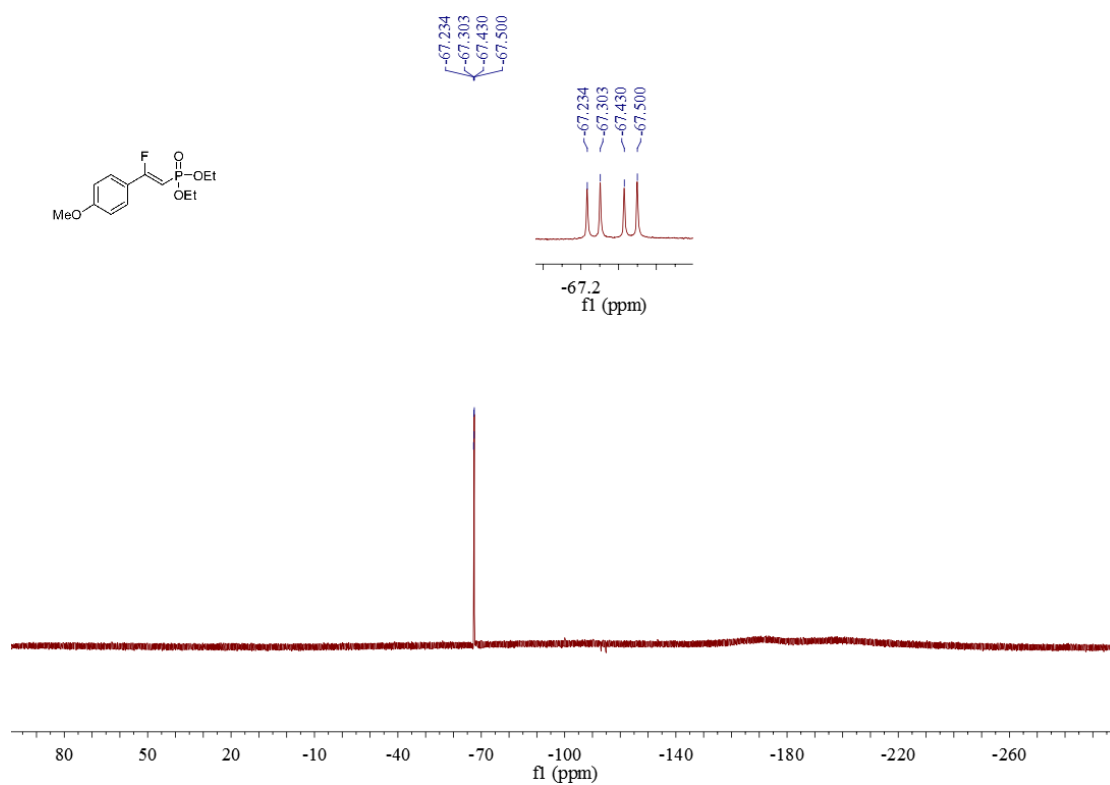

<sup>31</sup>P NMR

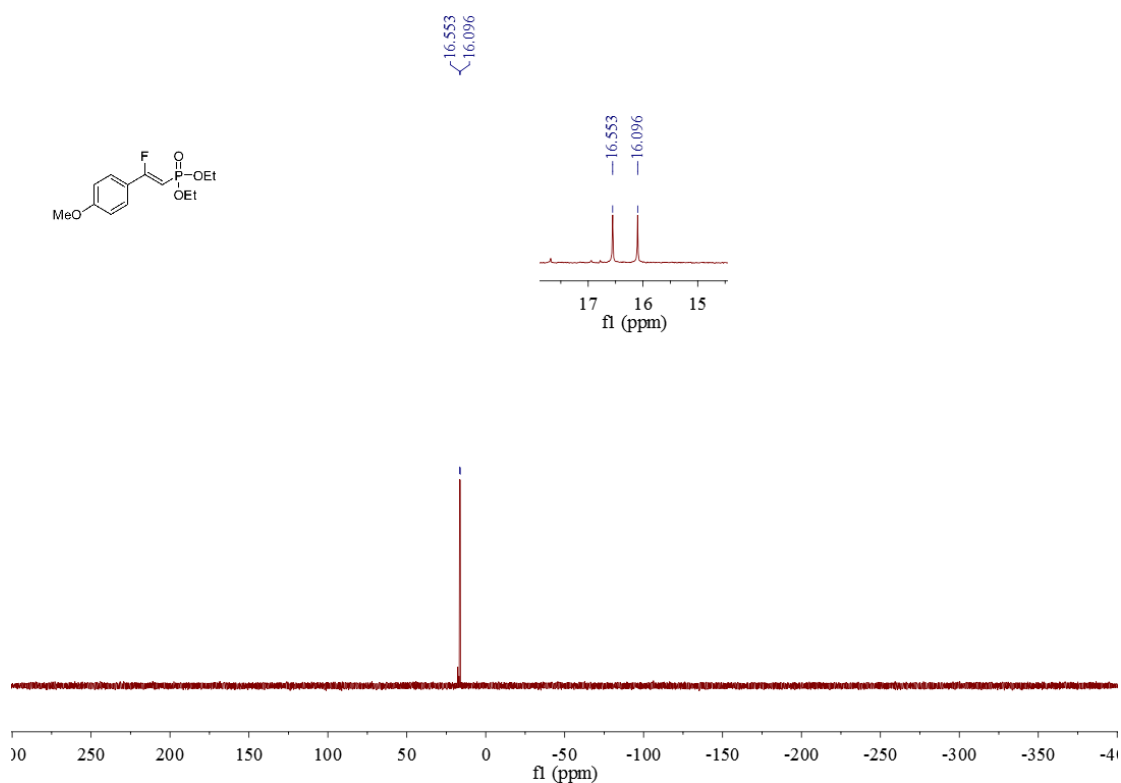

Diethyl (Z)-2-([1,1'-biphenyl]-4-yl)-2-fluorovinylphosphonate (2f)

<sup>1</sup>H NMR

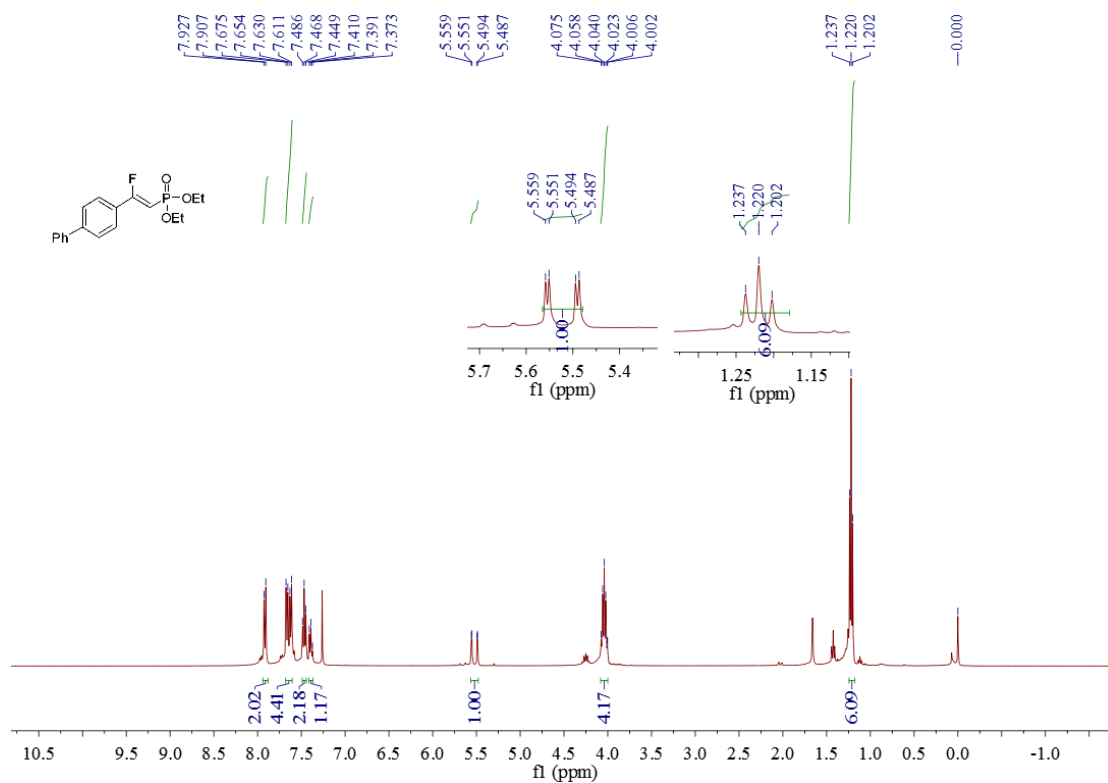

# <sup>13</sup>C NMR

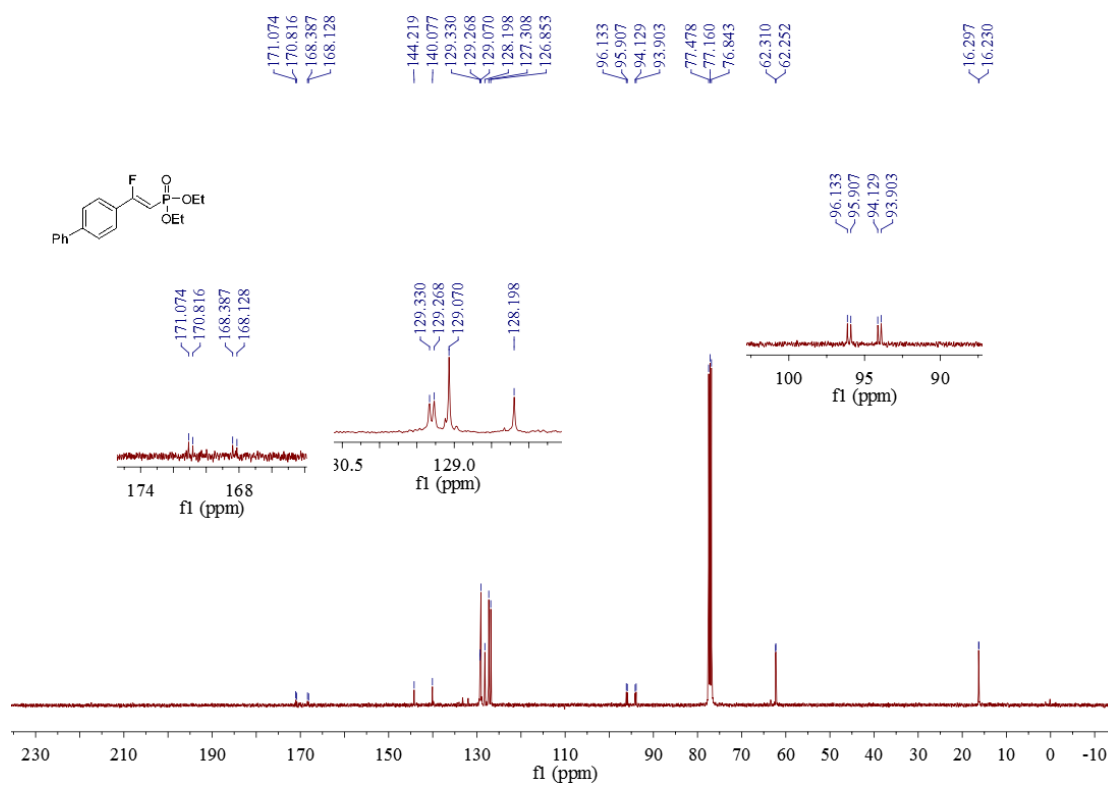

# <sup>19</sup>F NMR

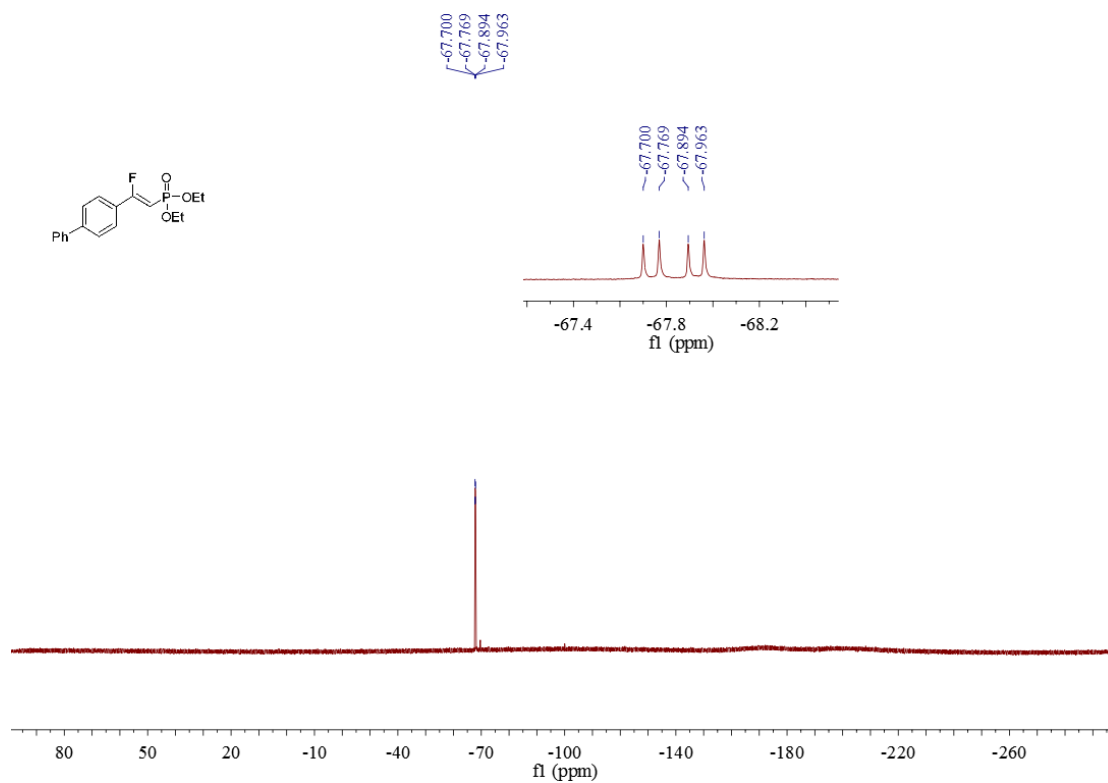

$^{31}\text{P}$  NMR

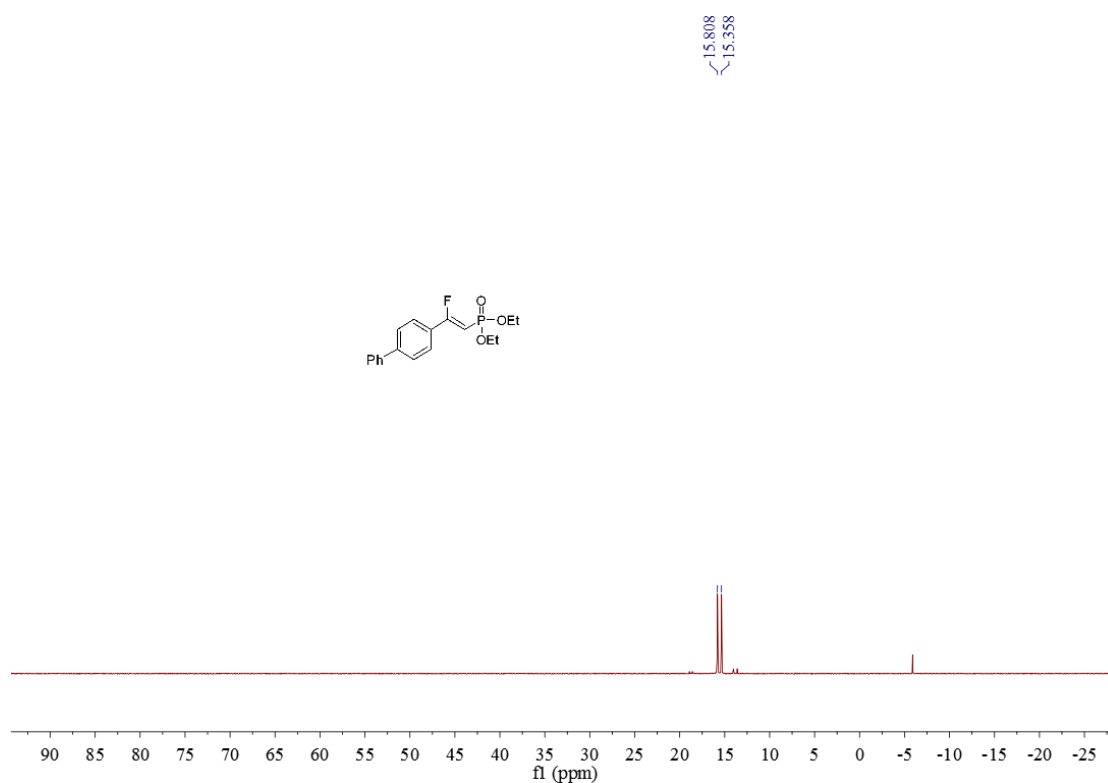

### Diethyl (Z)-(2-fluoro-2-(4-fluorophenyl)vinyl)phosphonate (2g)

$^1\text{H}$  NMR

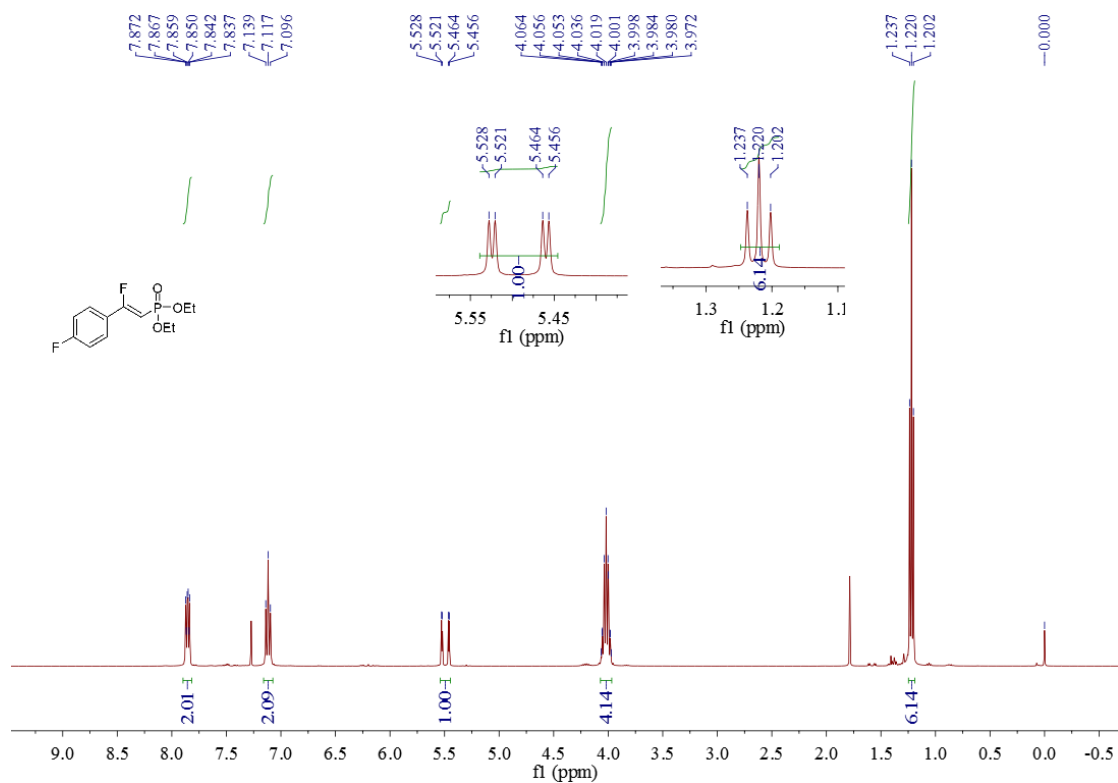

# <sup>13</sup>C NMR

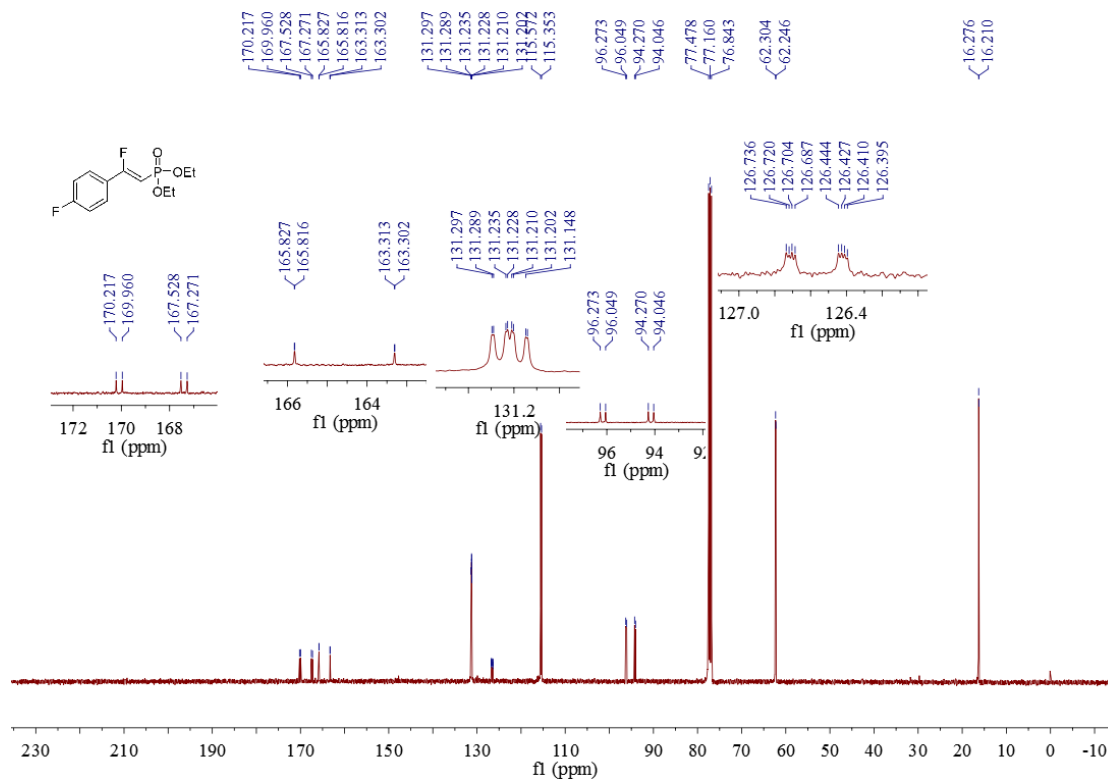

# <sup>19</sup>F NMR

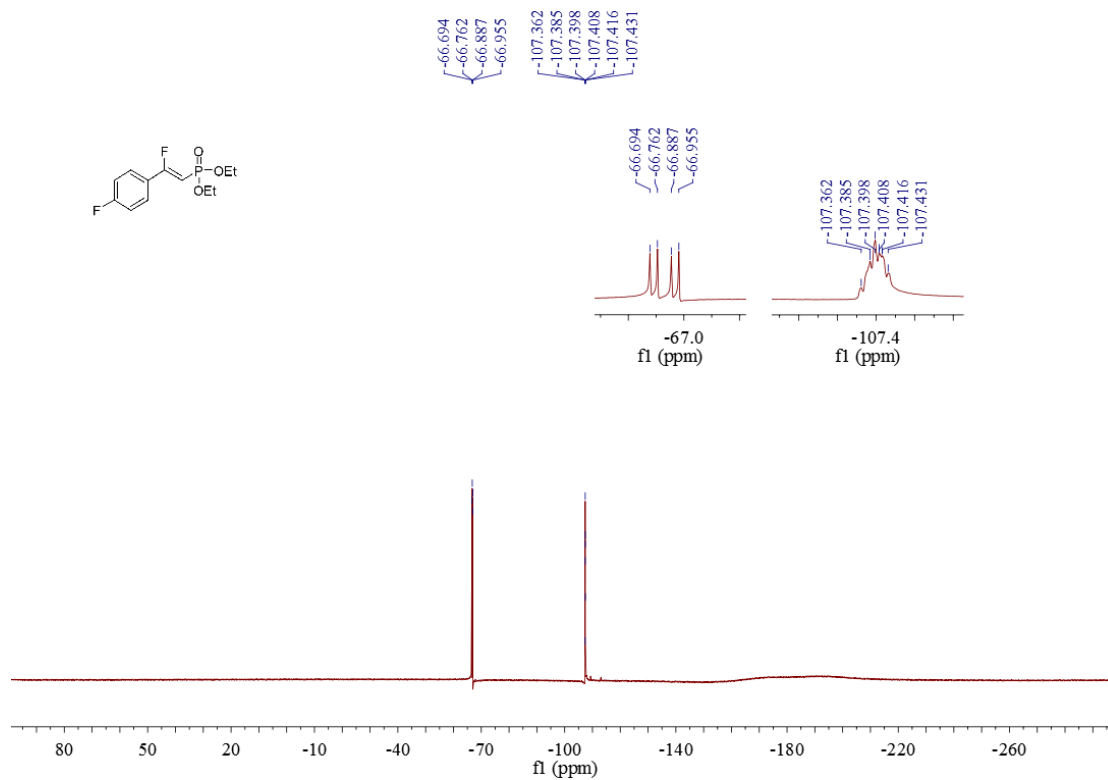



<sup>31</sup>P NMR

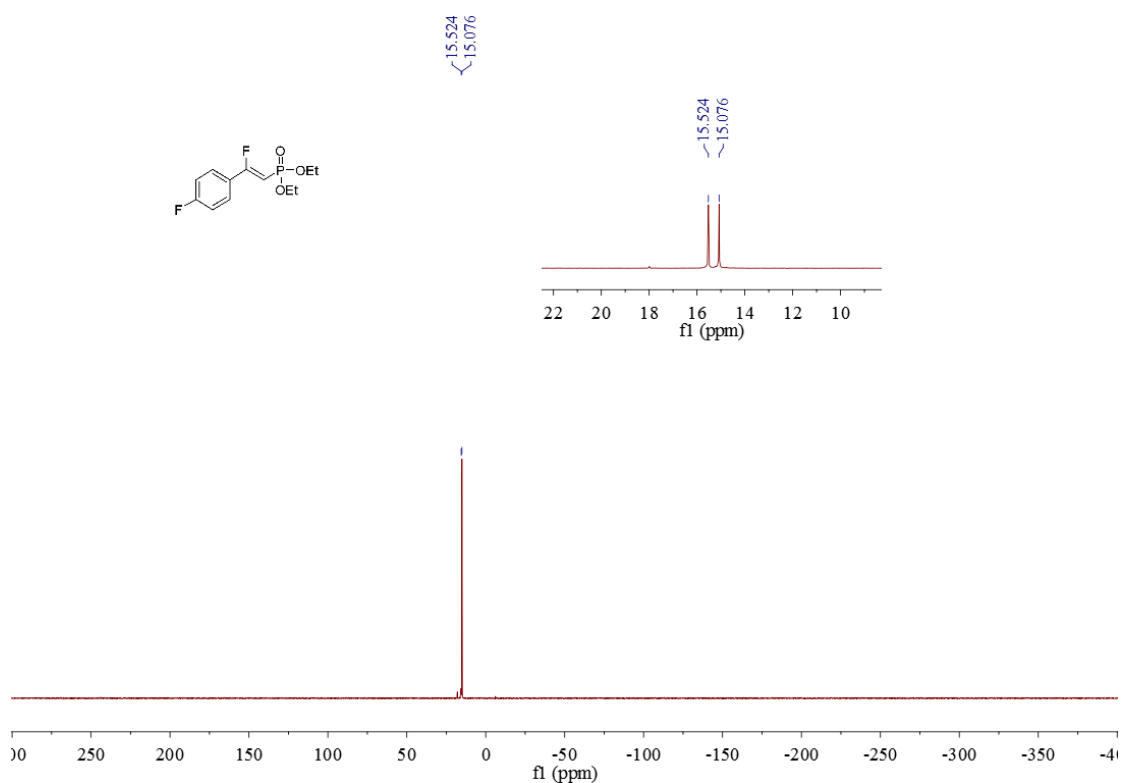

Diethyl (Z)-(2-fluoro-2-(3-fluorophenyl)vinyl)phosphonate (2h)

<sup>1</sup>H NMR

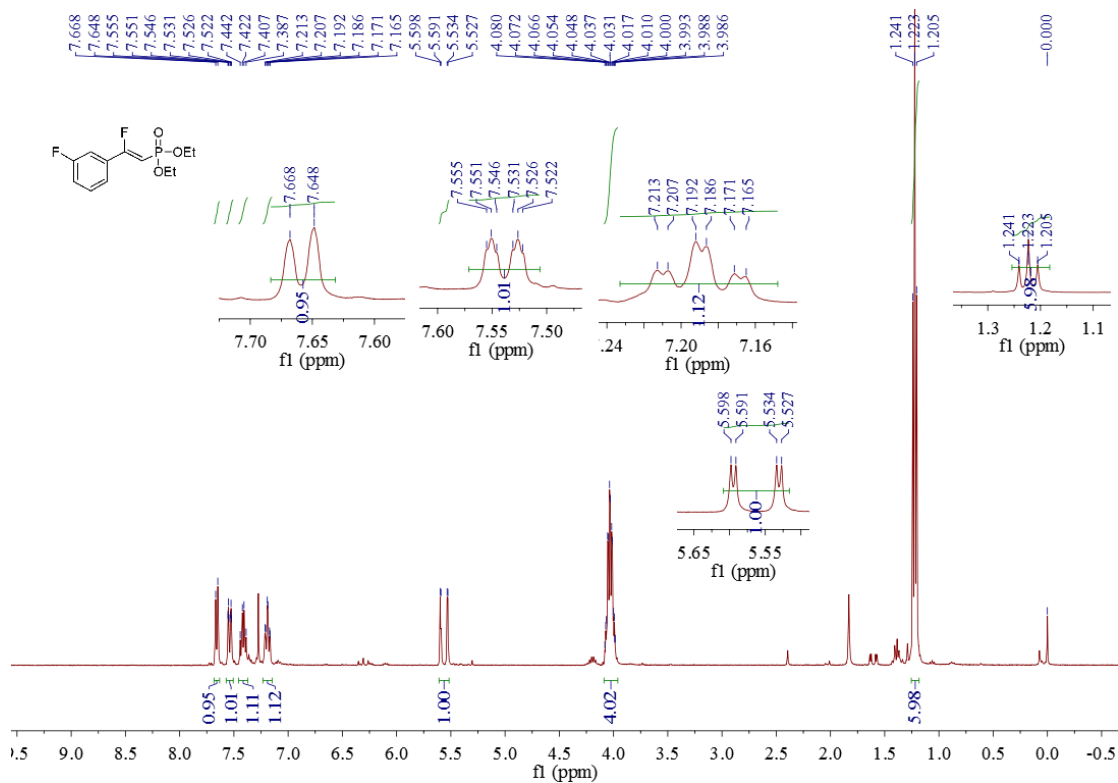

Chemical structure of diethyl 2-(2-fluorophenyl)-2-fluorophosphonate is shown in the top left corner. The  $^{13}\text{C}$  NMR spectrum (400 MHz,  $\text{CDCl}_3$ ) displays the following chemical shifts (ppm):

- 169.581, 169.556, 169.329, 169.304, 166.887, 166.861, 166.634, 166.609, 163.451, 160.998
- 129.983, 129.903, 124.799, 124.769, 124.745, 124.713, 118.632, 118.422, 115.922, 115.863, 115.851, 115.834, 115.822, 115.802, 115.782, 115.762, 115.736
- 114.331, 114.115, 16.257, 16.191

Chemical structure: CCOP(=O)C(F)=Cc1ccc(F)cc1

<sup>13</sup>C NMR spectrum (ppm):

- Aromatic/alkene region (left):
  - 67.797, 67.865, 67.988, 68.056
- Ester carbonyl region (right):
  - 112.203, 112.207, 112.219, 112.229, 112.244, 112.255, 112.266, 112.270

Integration values: -67.8 fl (ppm), -112.2 fl (ppm)

$^{31}\text{P}$  NMR

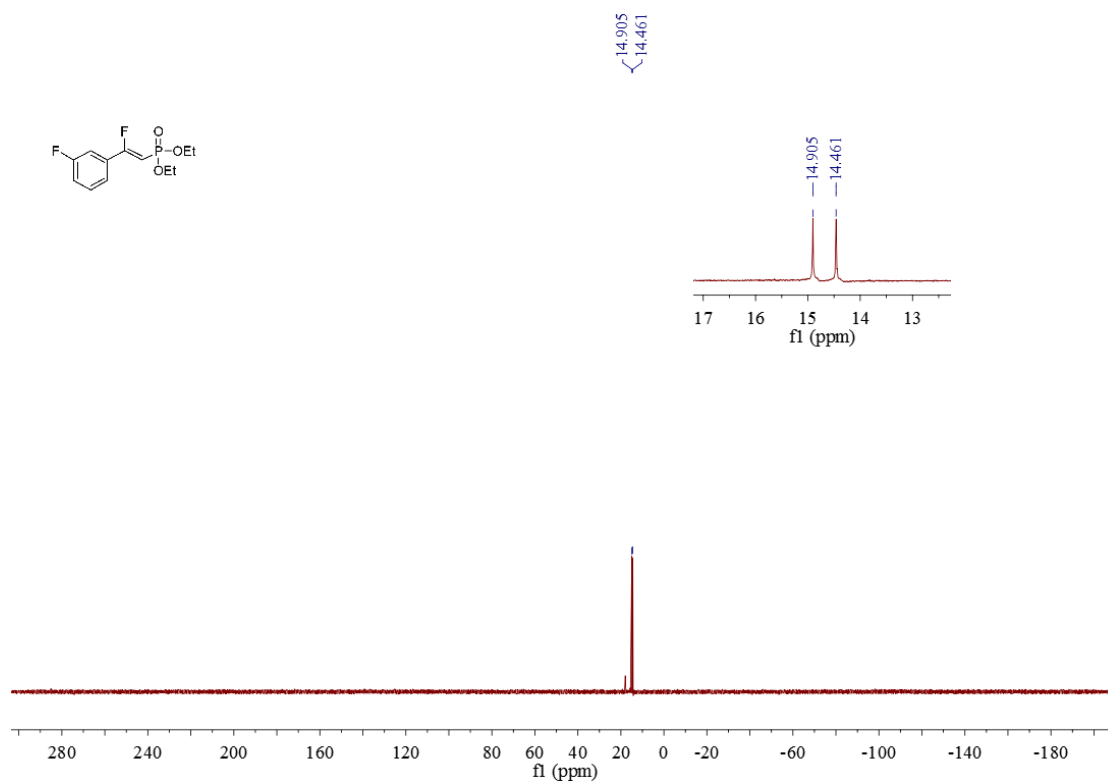

**Diethyl (Z)-(2-(4-chlorophenyl)-2-fluorovinyl)phosphonate (2i)**

$^1\text{H}$  NMR

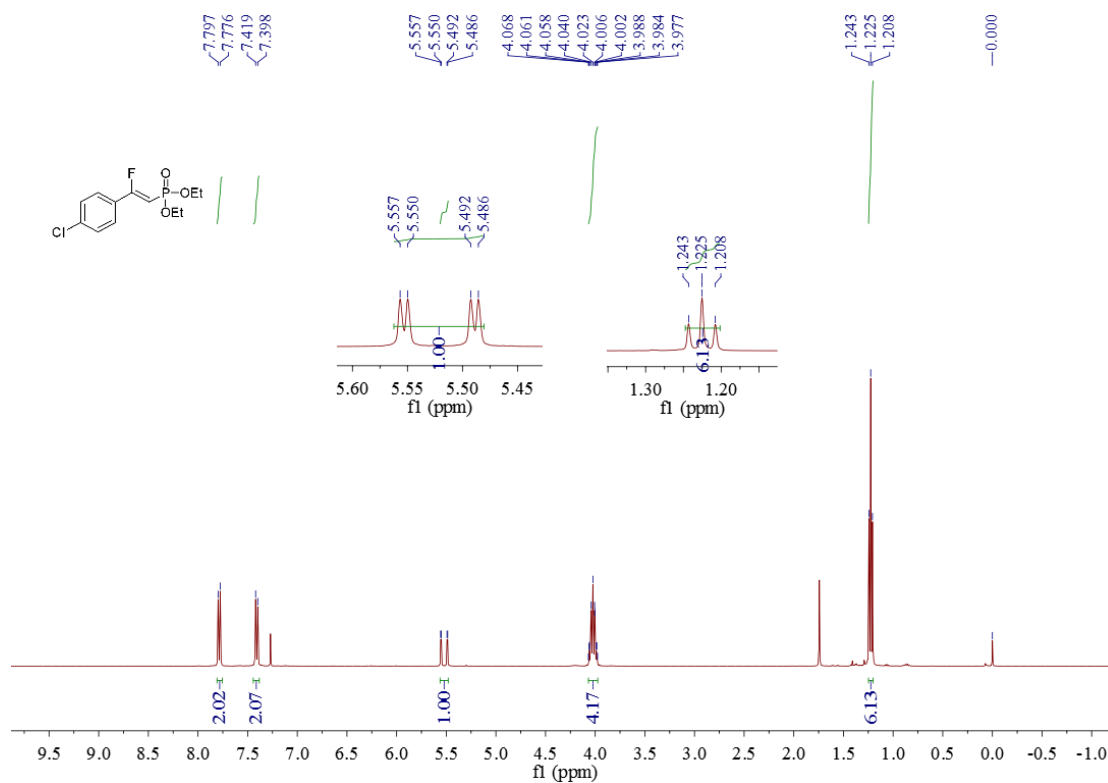

<sup>13</sup>C NMR

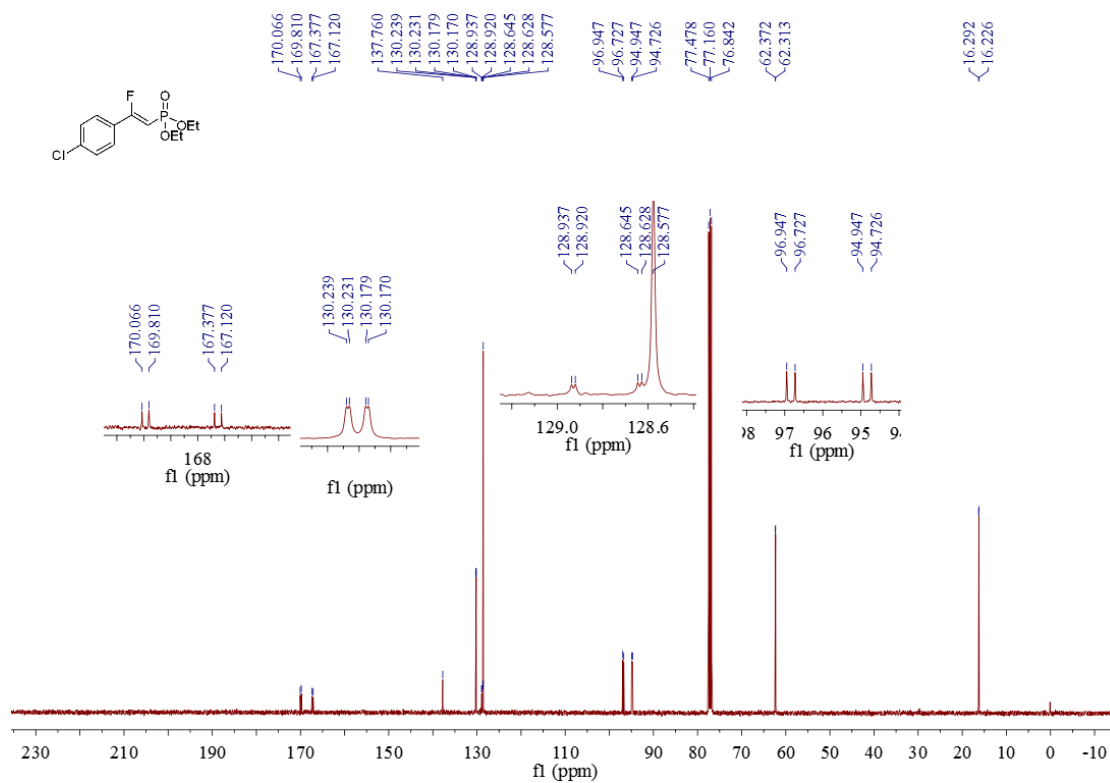

<sup>19</sup>F NMR

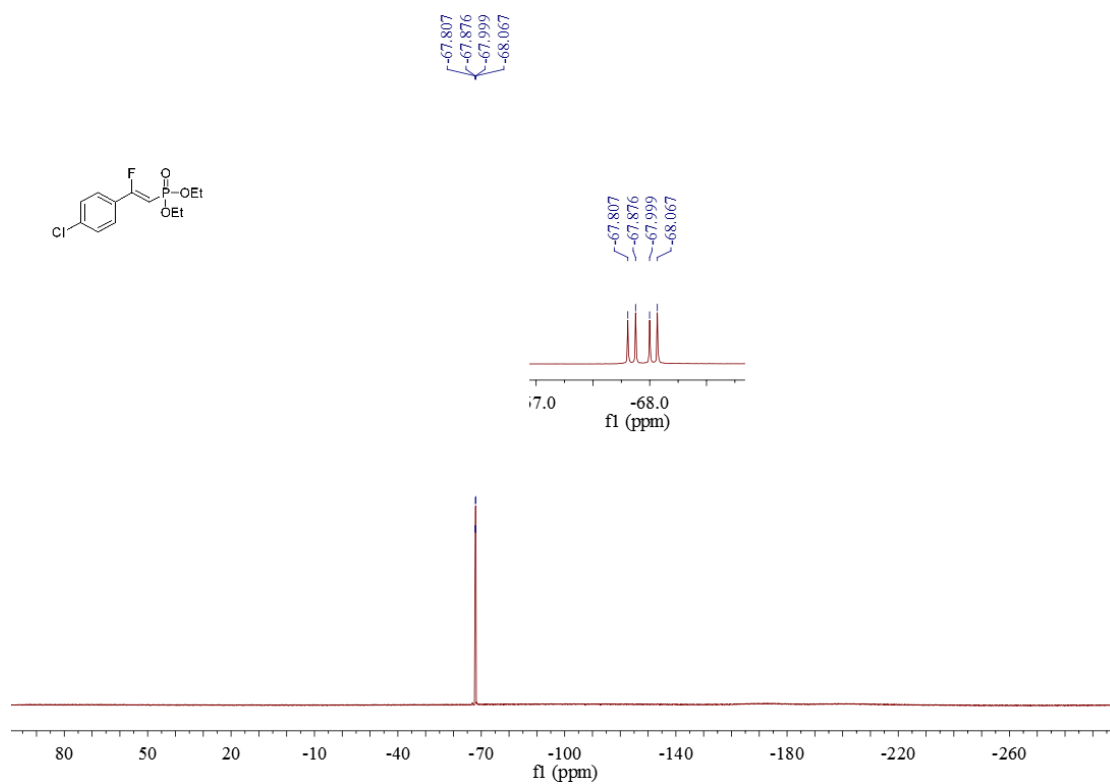

$^{31}\text{P}$  NMR

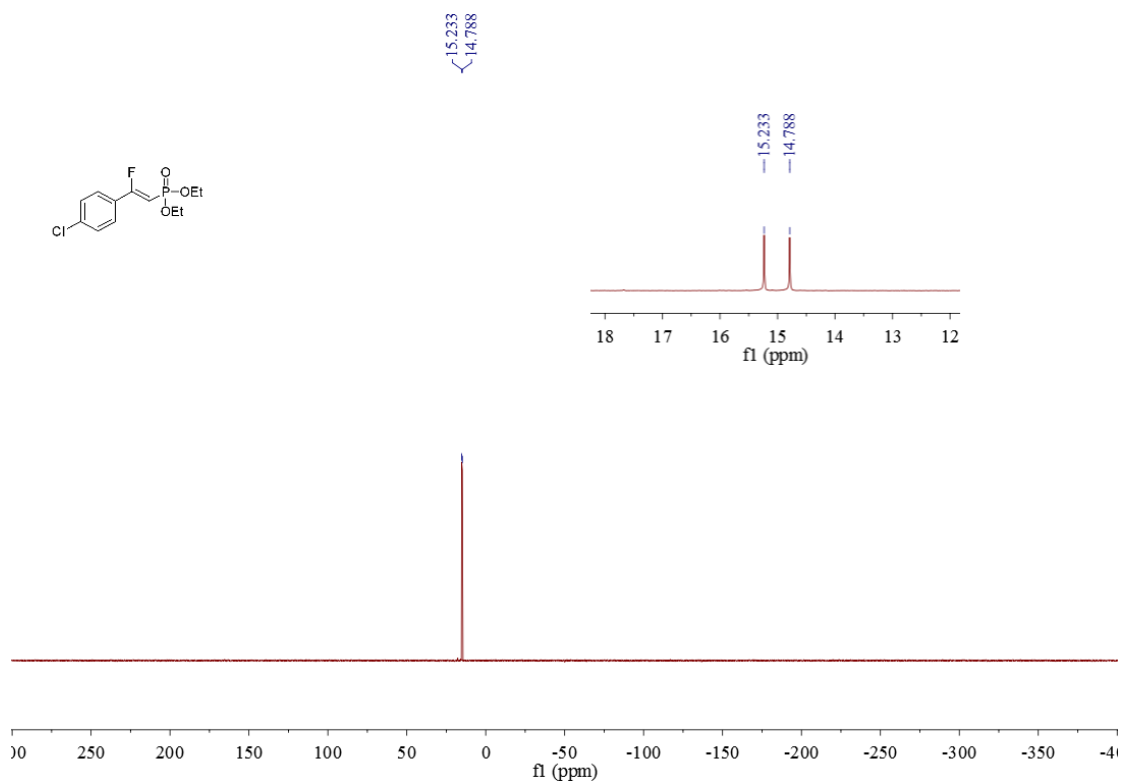

**Diethyl (Z)-(2-(3-chlorophenyl)-2-fluorovinyl)phosphonate (2j)**

$^1\text{H}$  NMR

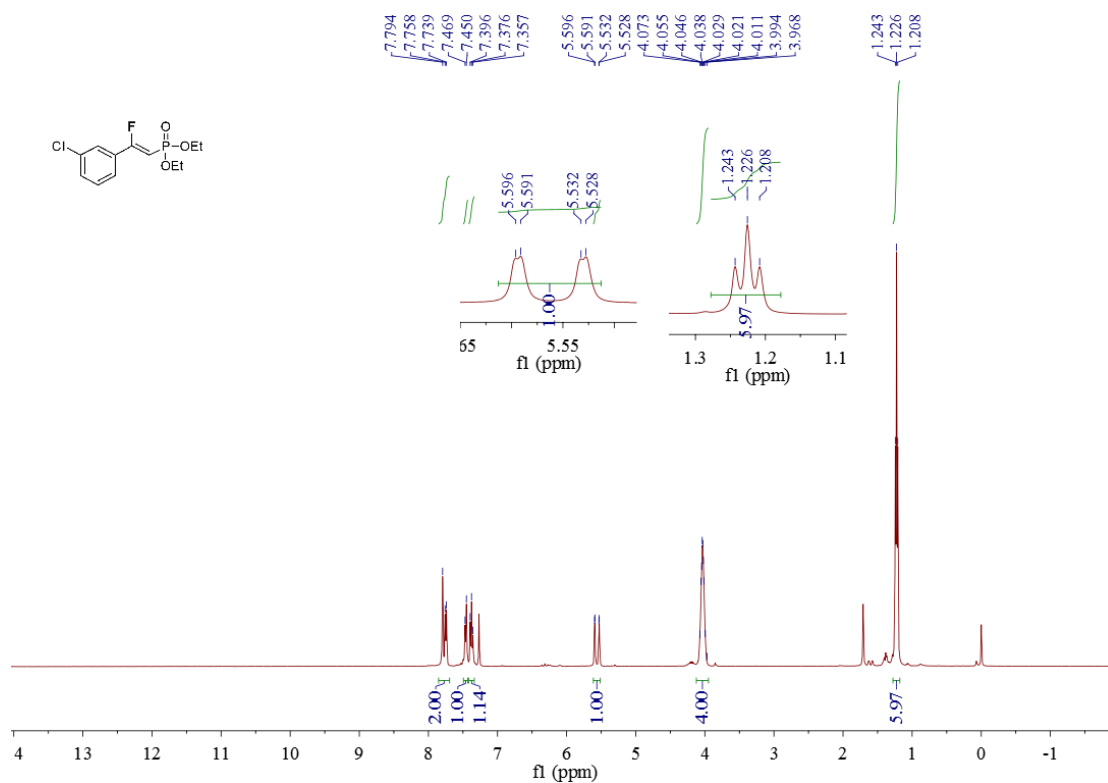

# <sup>13</sup>C NMR

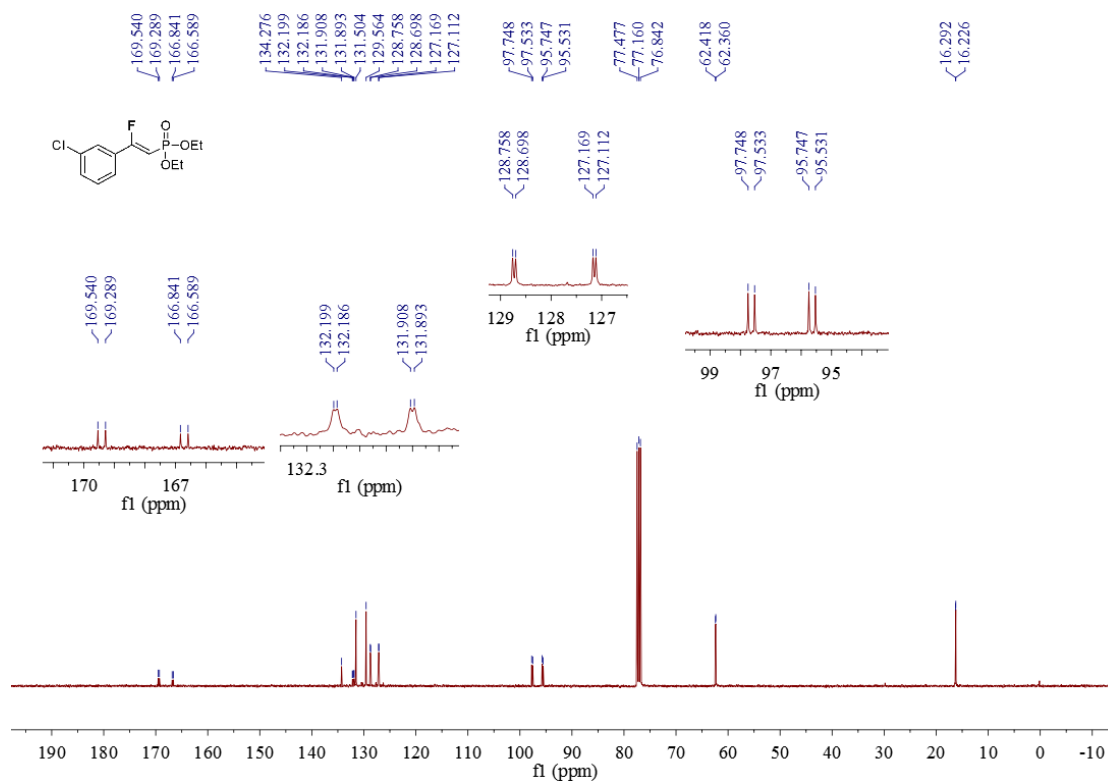

# <sup>19</sup>F NMR

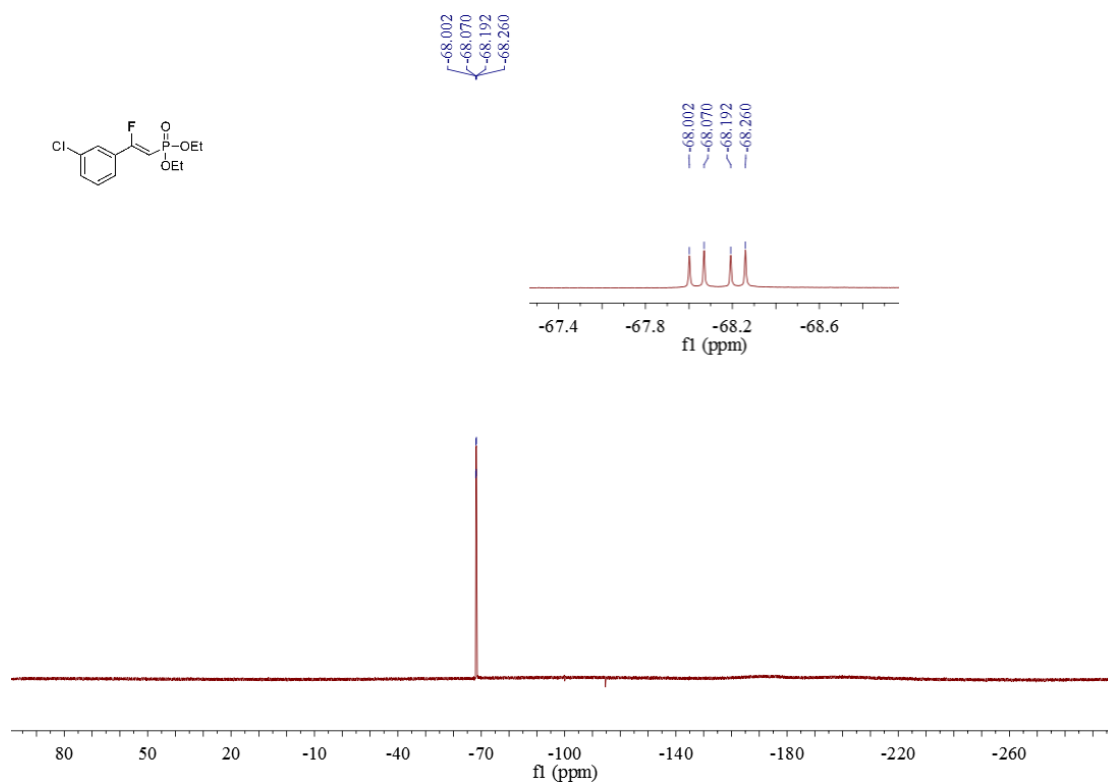

<sup>31</sup>P NMR

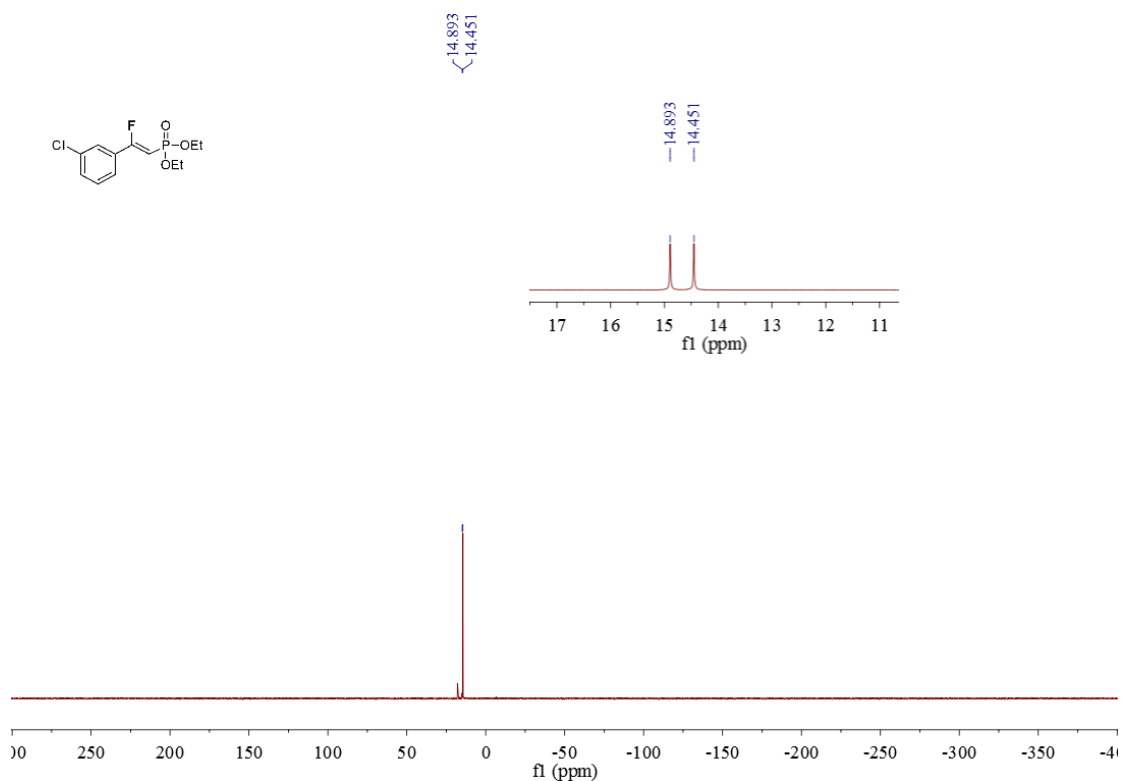

Diethyl (Z)-(2-(2-chlorophenyl)-2-fluorovinyl)phosphonate (2k)

<sup>1</sup>H NMR

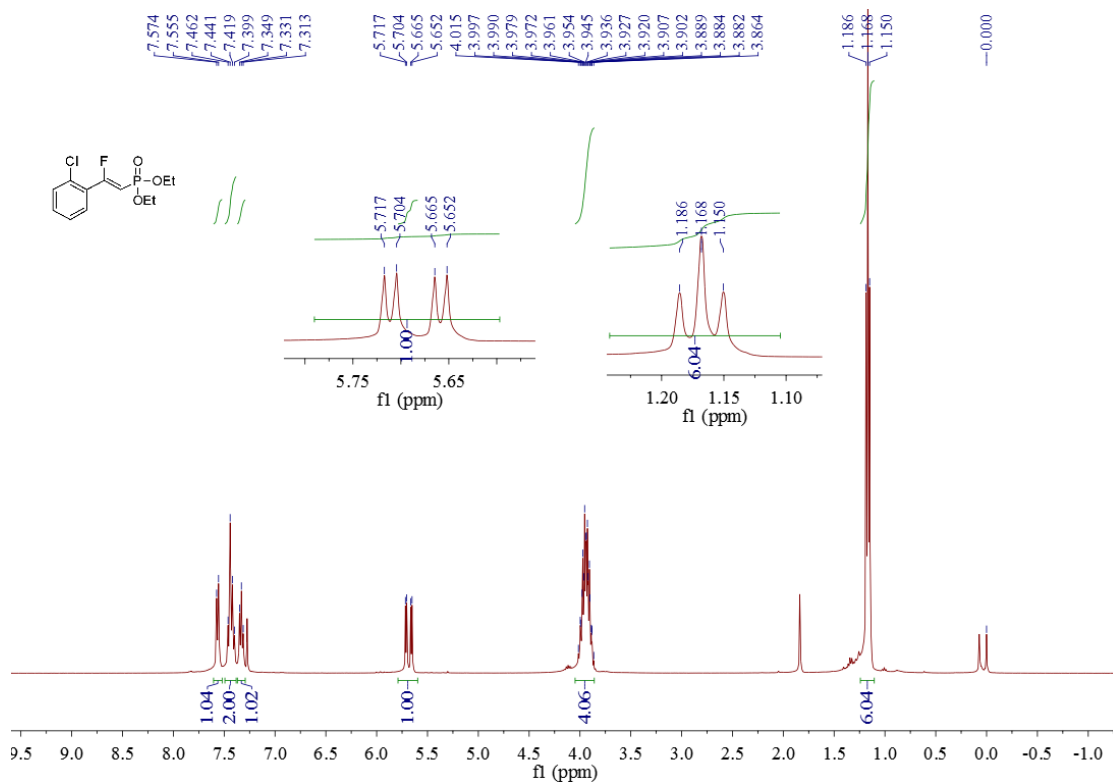

# <sup>13</sup>C NMR

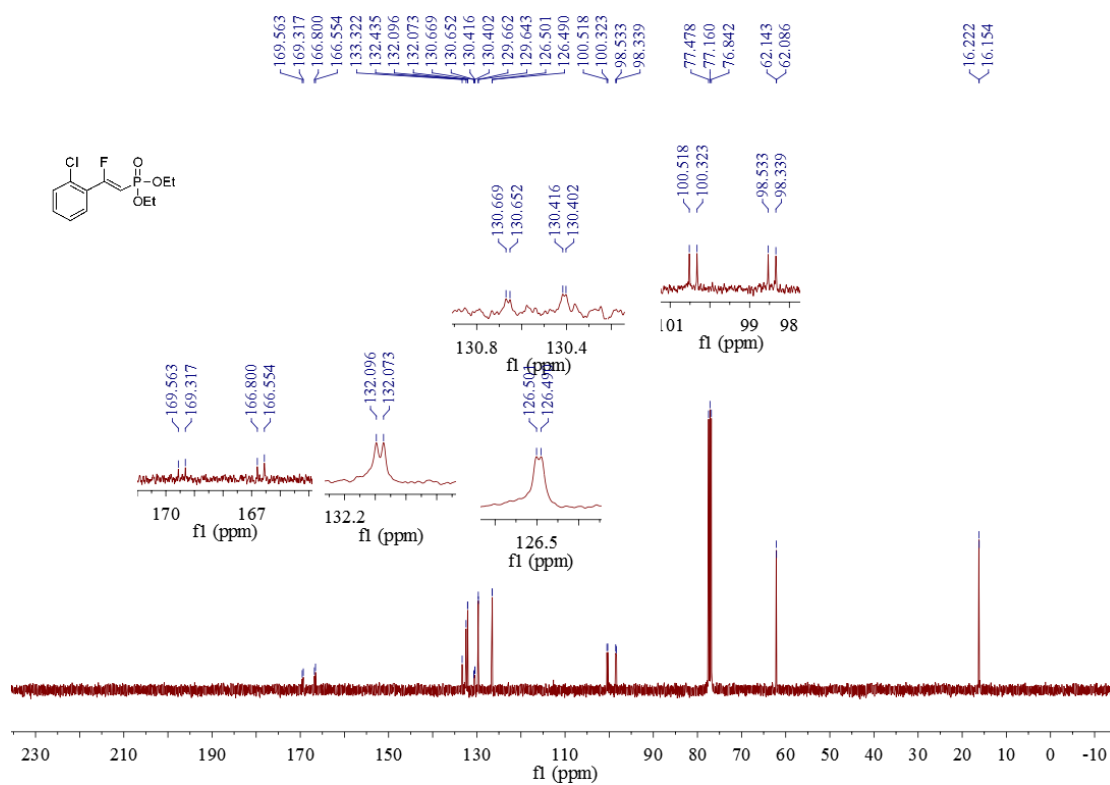

# <sup>19</sup>F NMR

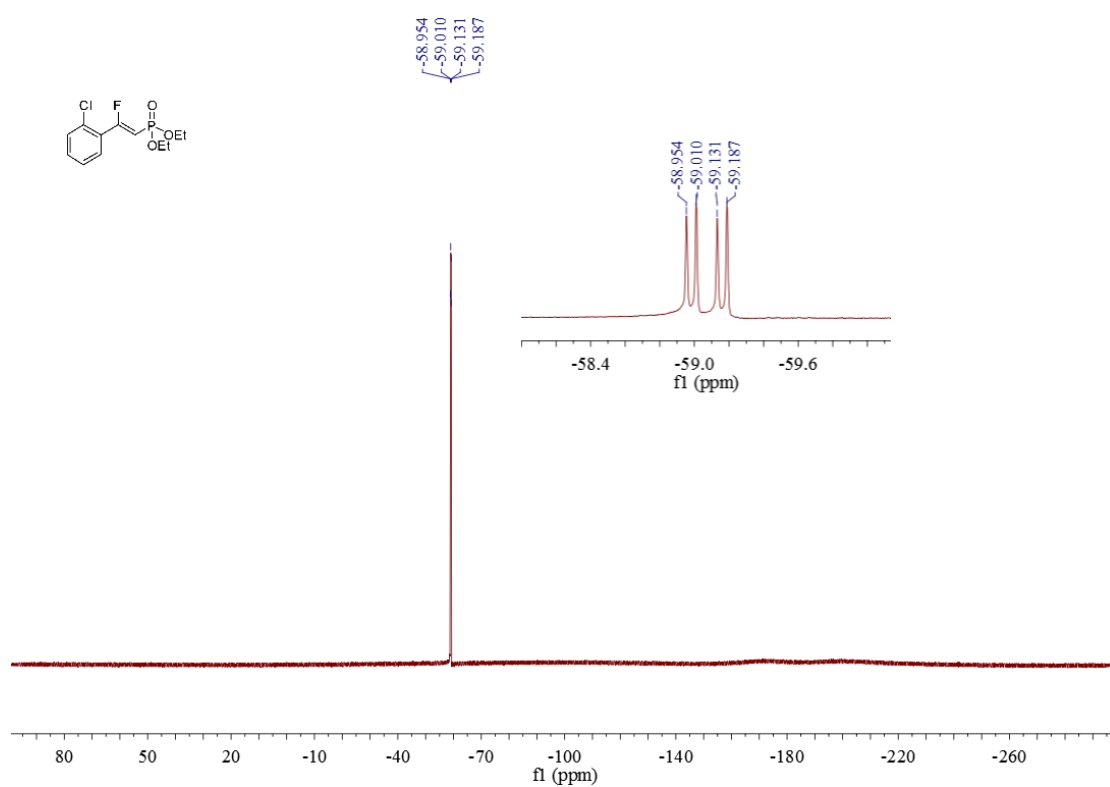



<sup>31</sup>P NMR

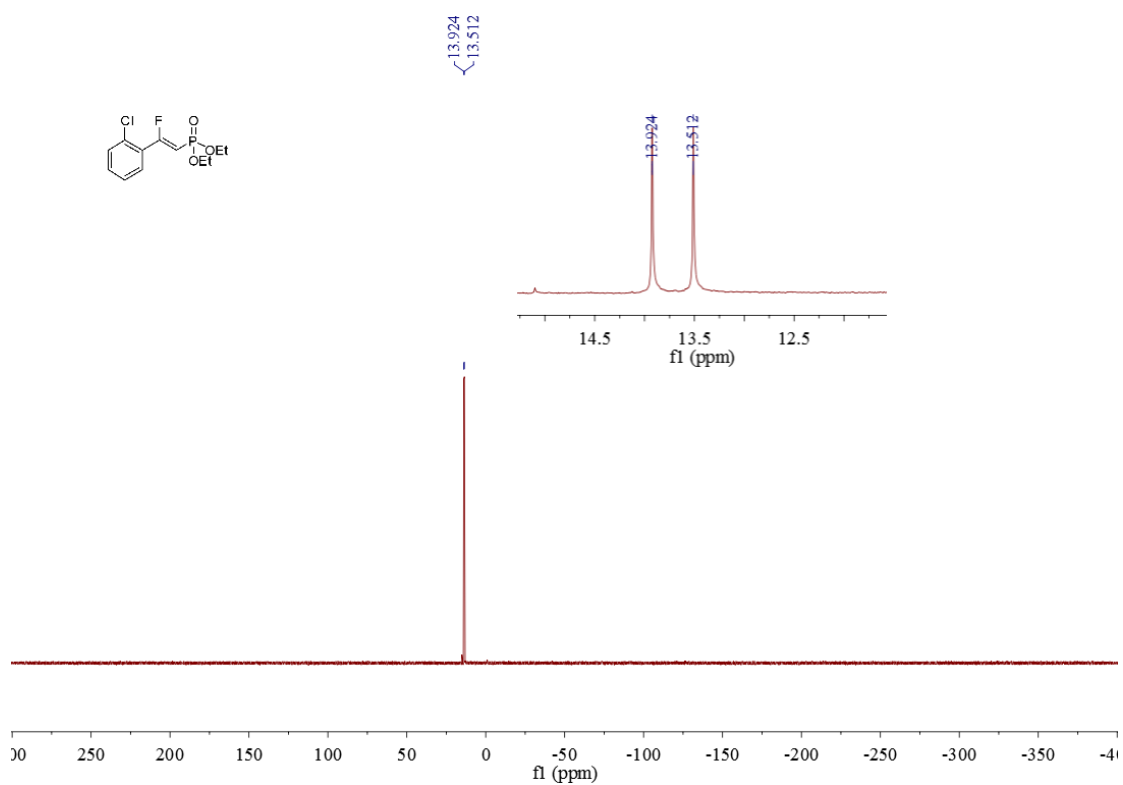

Diethyl (Z)-(2-(4-bromophenyl)-2-fluorovinyl)phosphonate (2l)

<sup>1</sup>H NMR

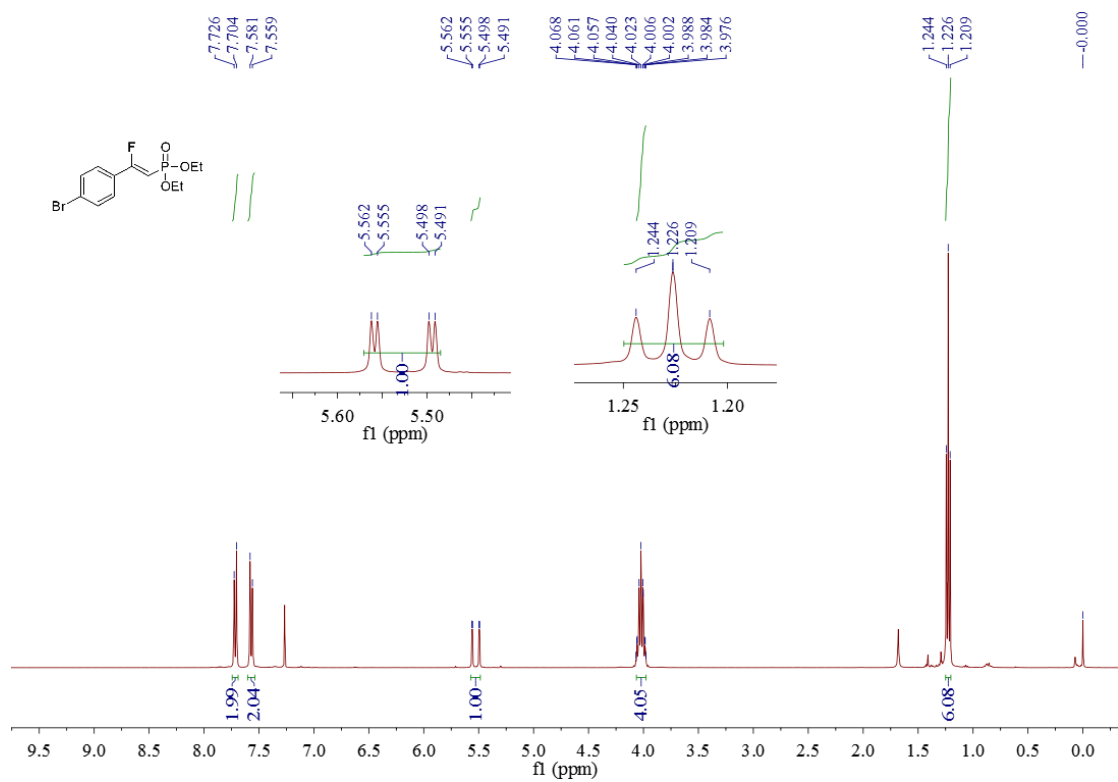

# <sup>13</sup>C NMR

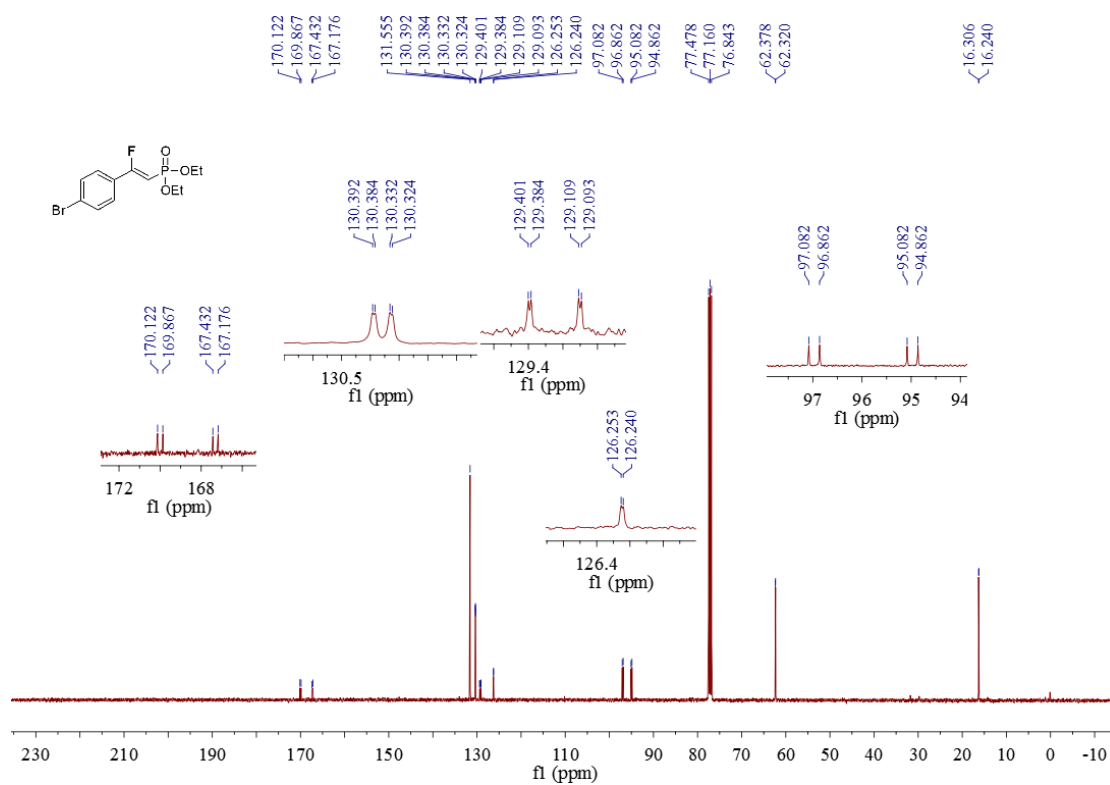

# <sup>19</sup>F NMR

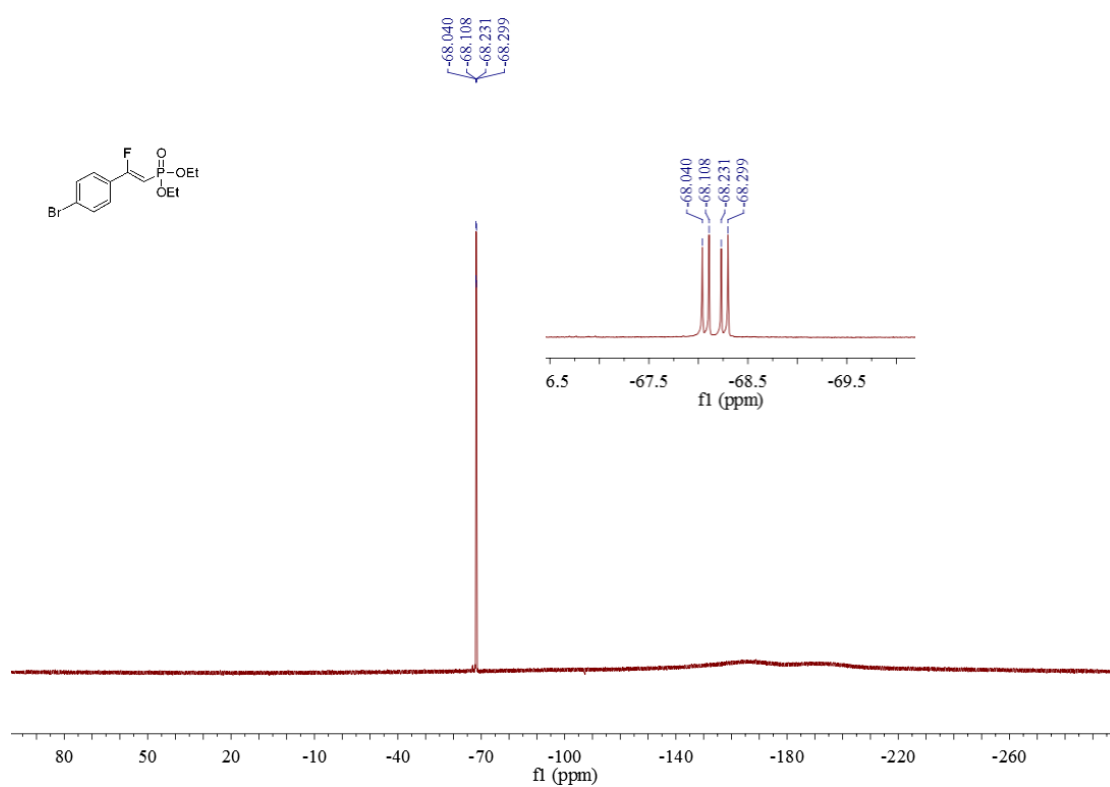

$^{31}\text{P}$  NMR

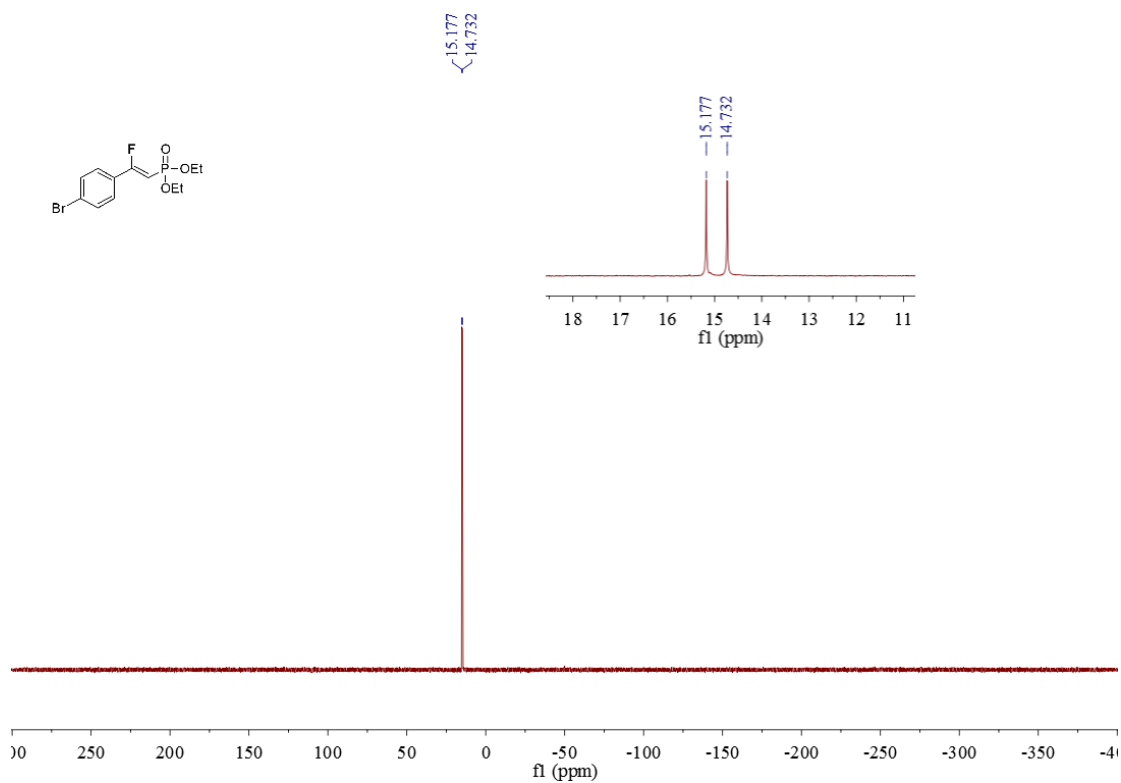

**Diethyl (Z)-2-fluoro-2-(4-(trifluoromethyl)phenyl)vinylphosphonate (2m)**

$^1\text{H}$  NMR

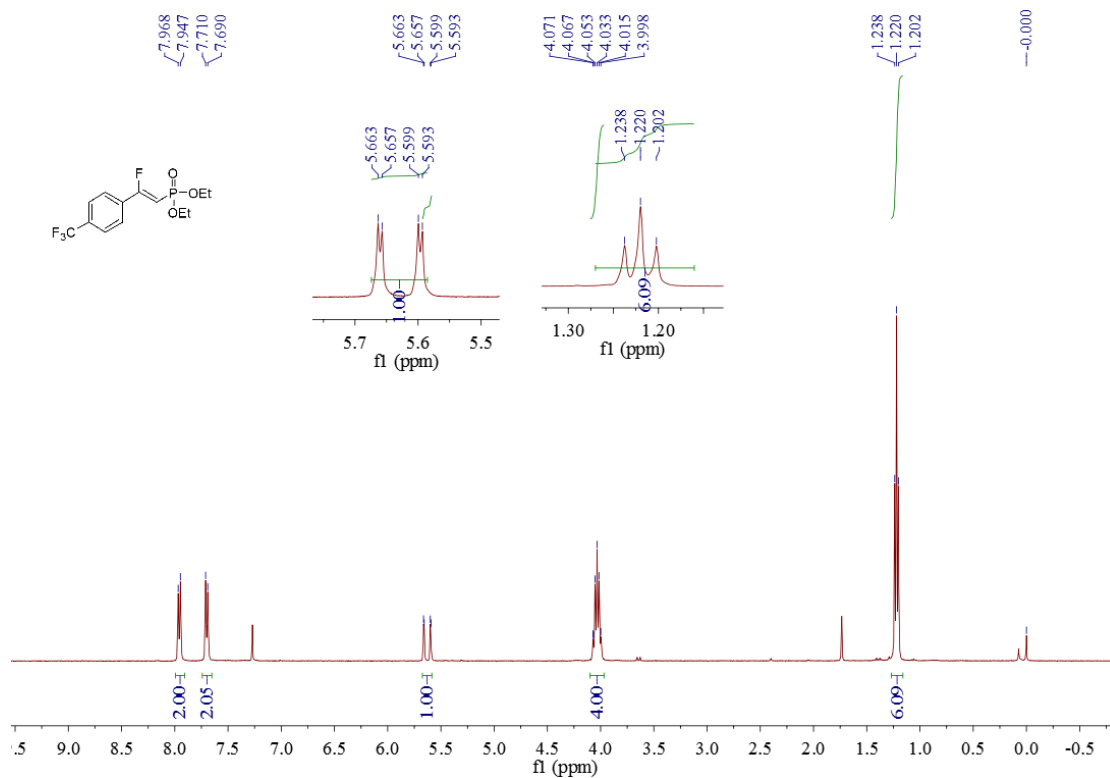

<sup>13</sup>C NMR

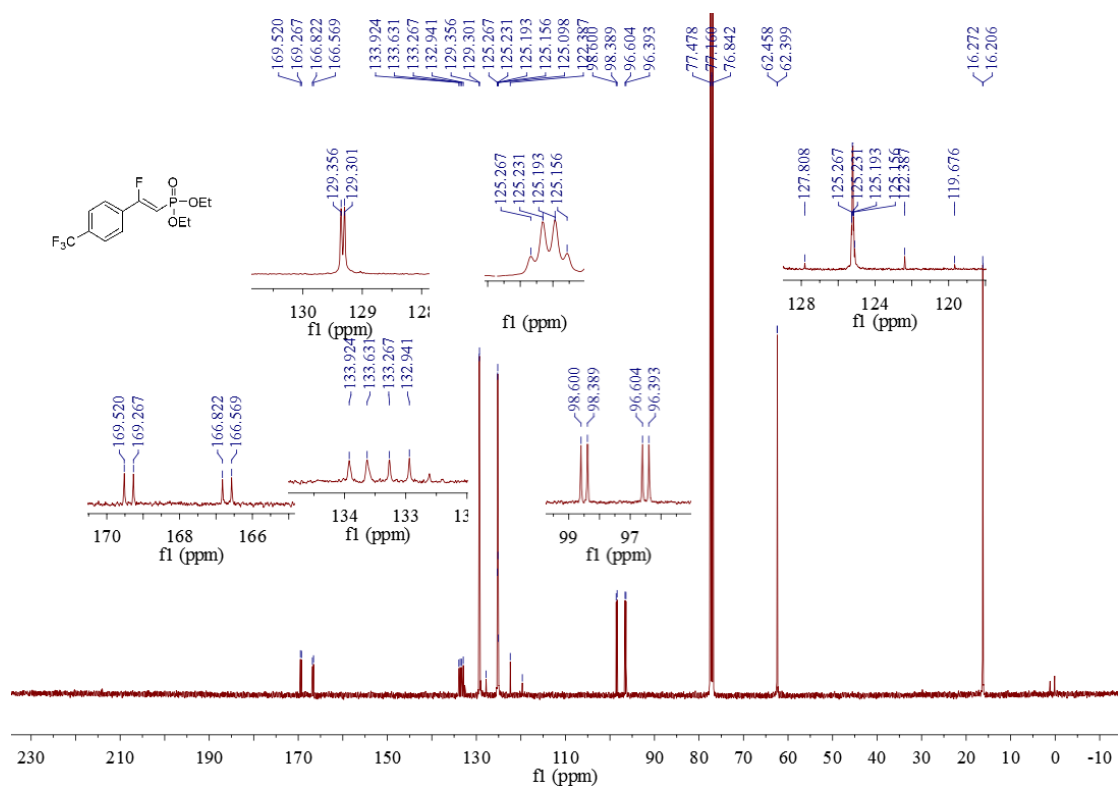

<sup>19</sup>F NMR

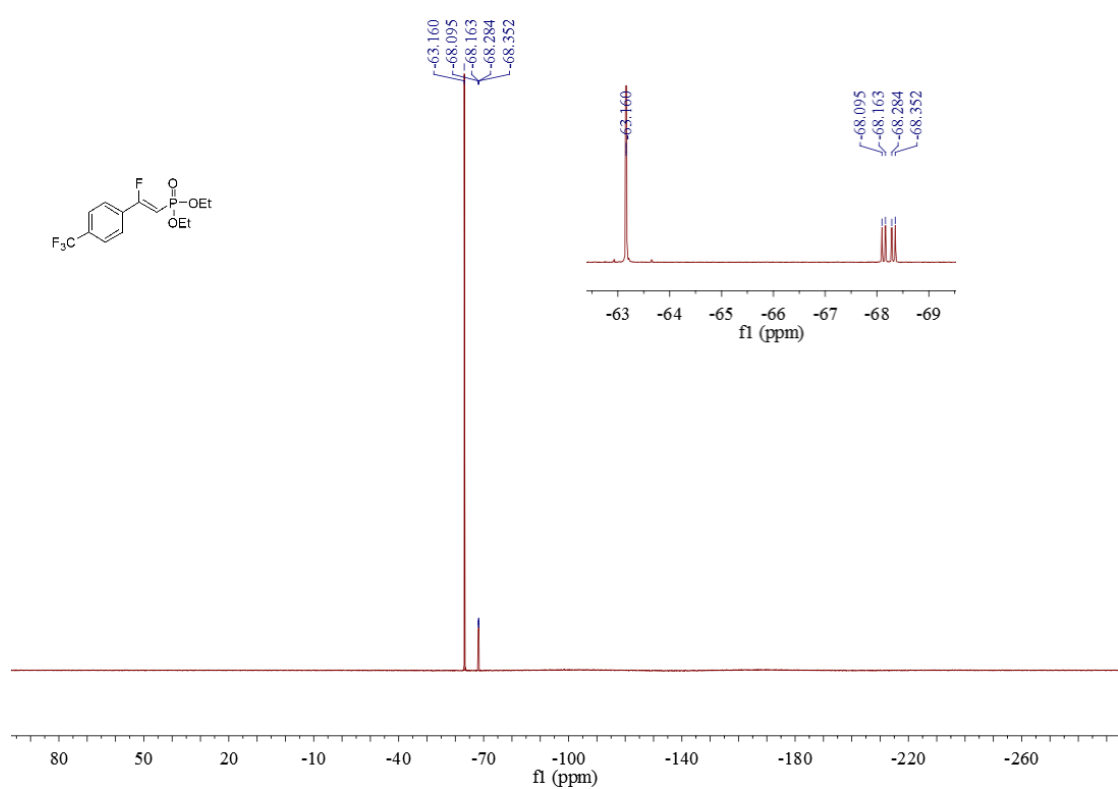

$^{31}\text{P}$  NMR

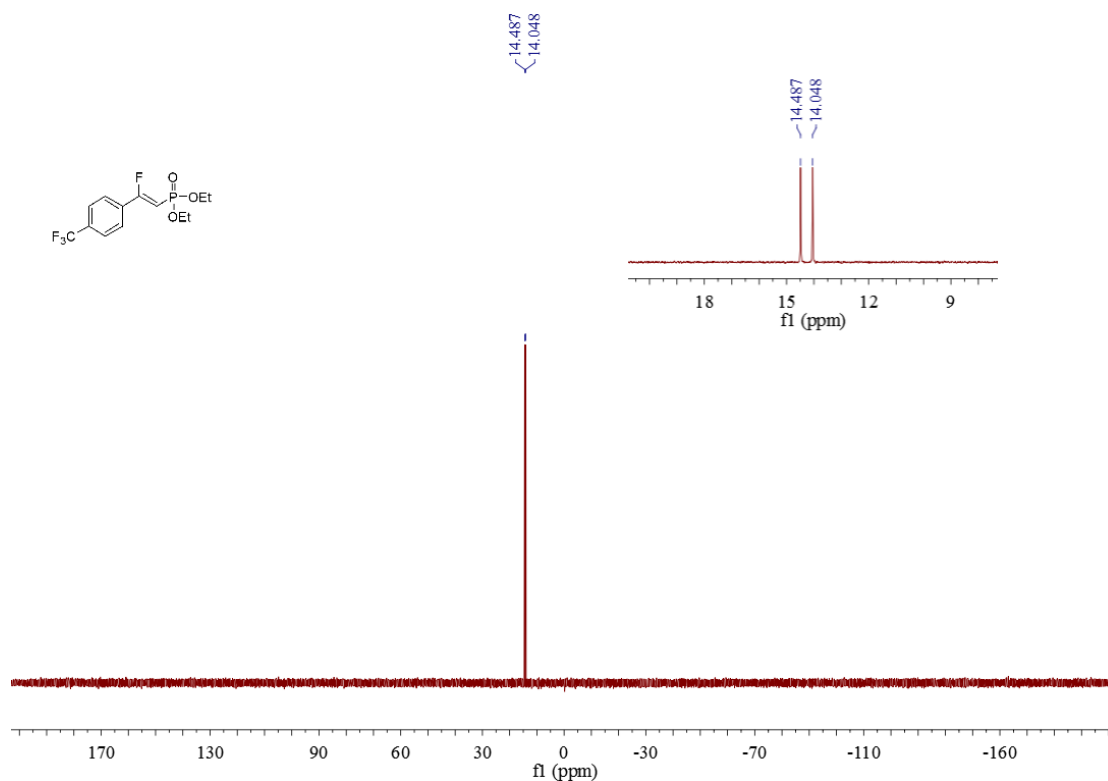

Diethyl (Z)-(2-(4-cyanophenyl)-2-fluorovinyl)phosphonate (2n)

$^1\text{H}$  NMR

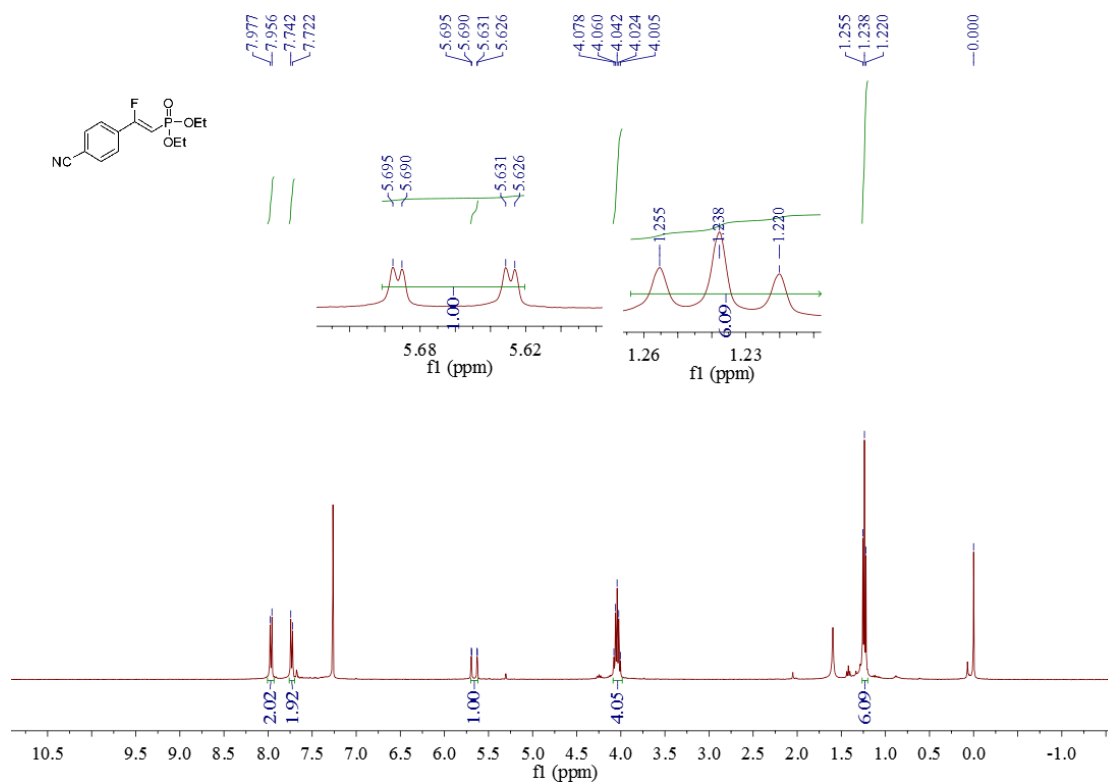

# <sup>13</sup>C NMR

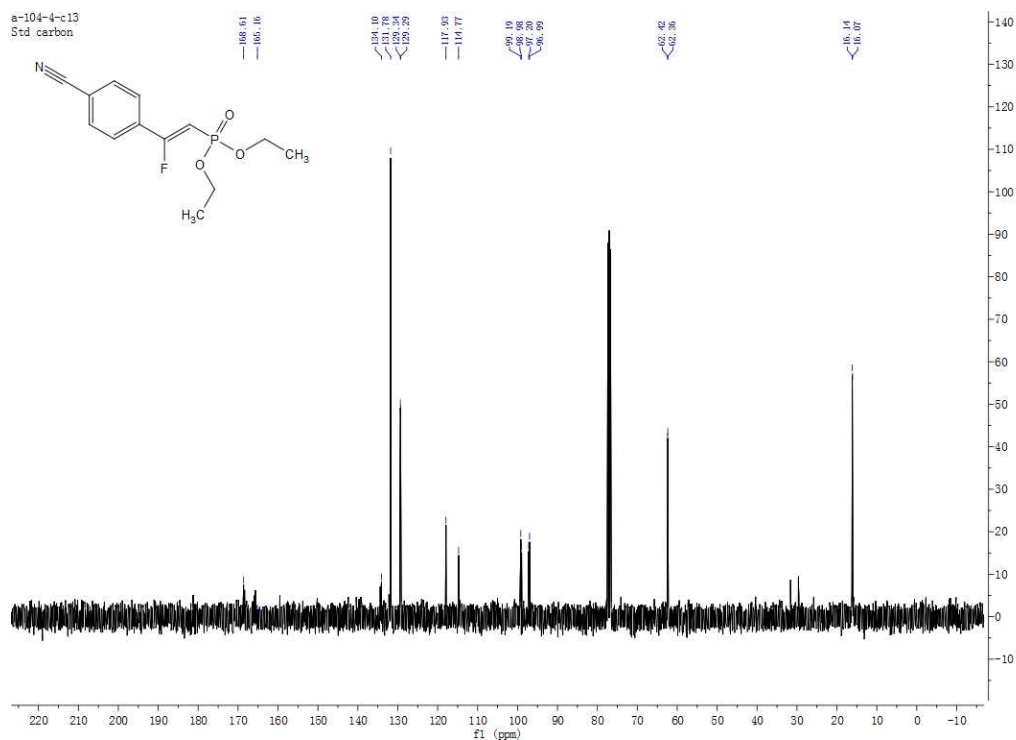

# <sup>19</sup>F NMR

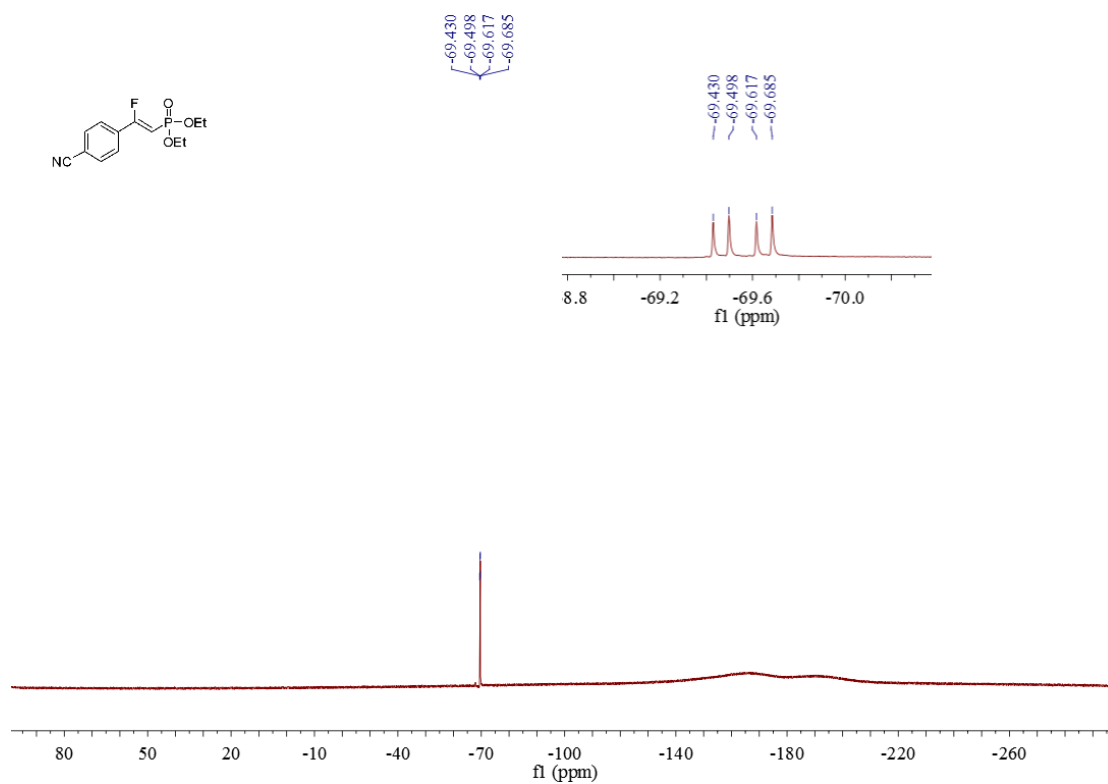

$^{31}\text{P}$  NMR

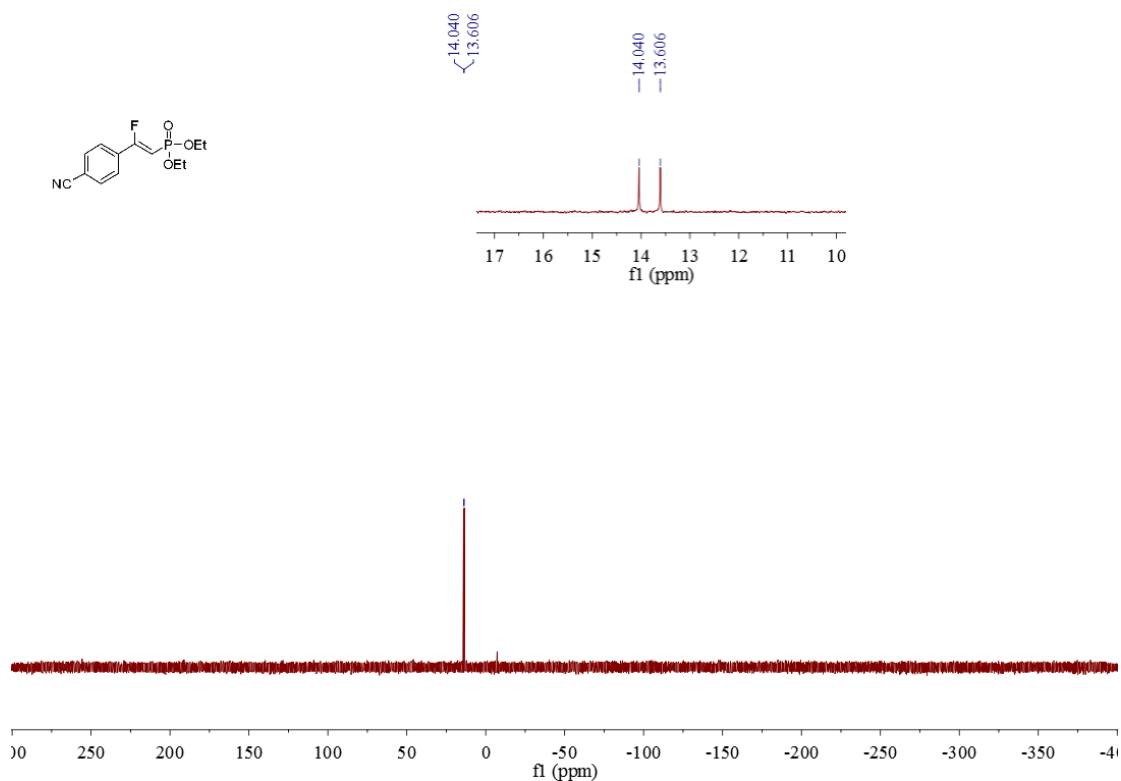

**Methyl (Z)-4-(2-(diethoxyphosphoryl)-1-fluorovinyl)benzoate (2o)**

$^1\text{H}$  NMR

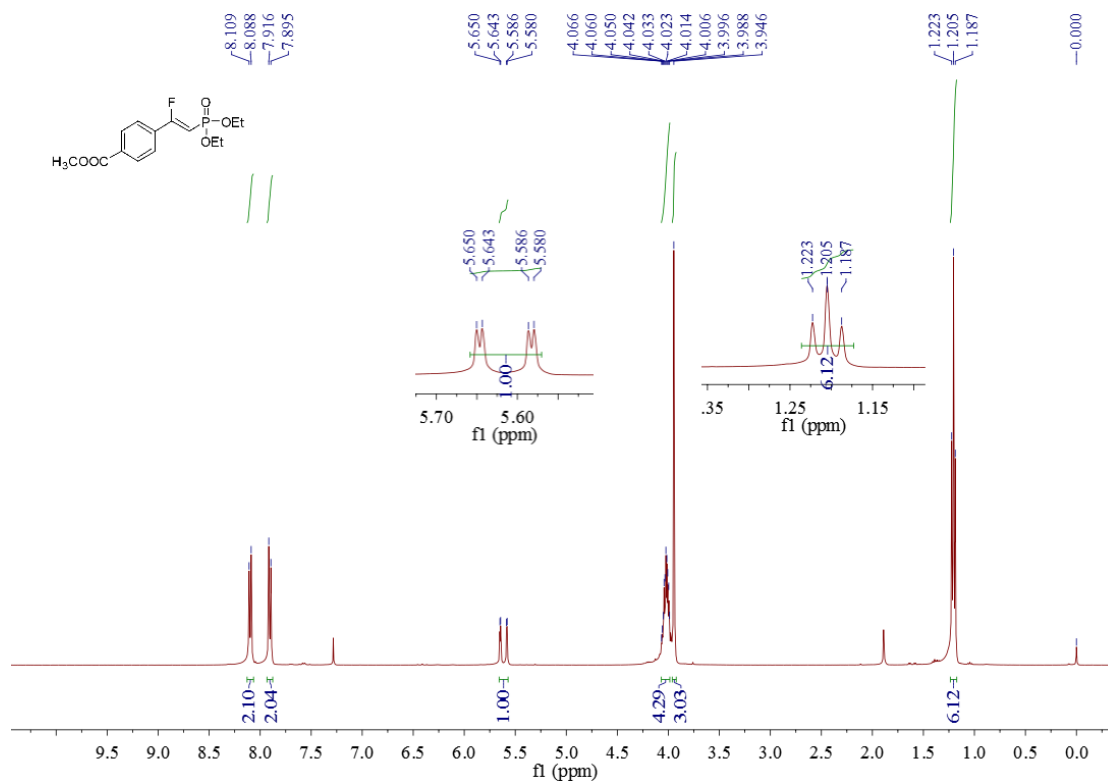

### <sup>13</sup>C NMR

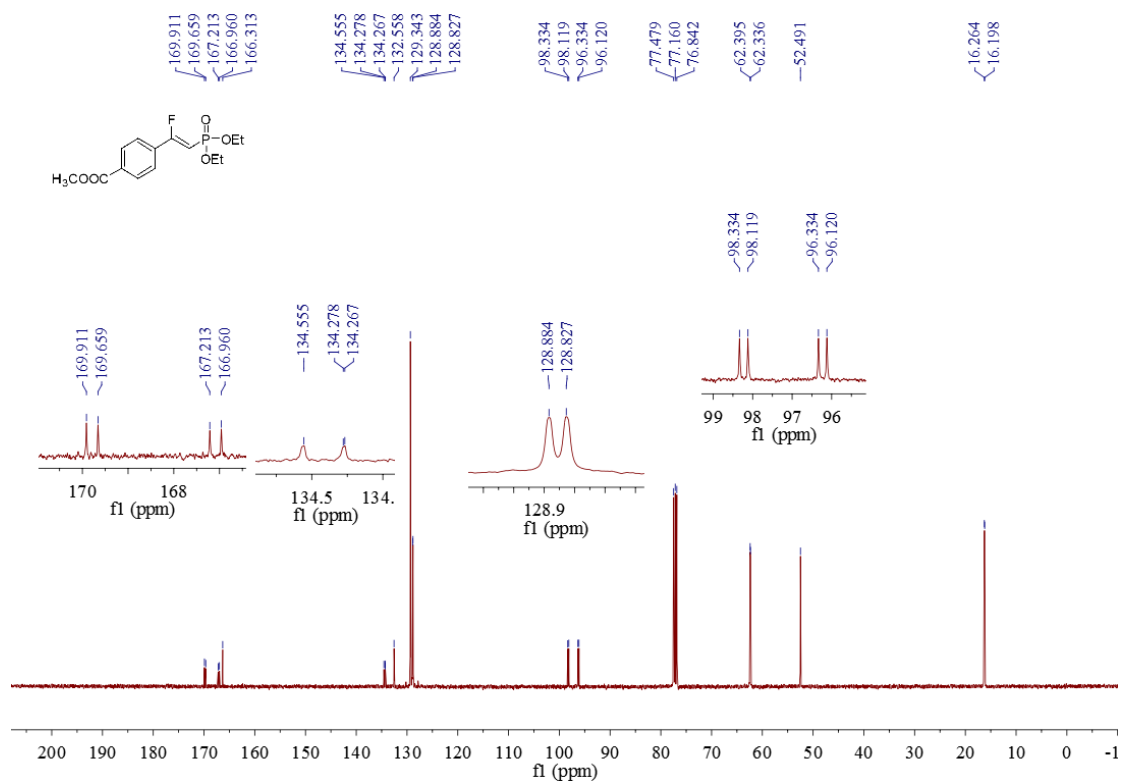

### <sup>19</sup>F NMR

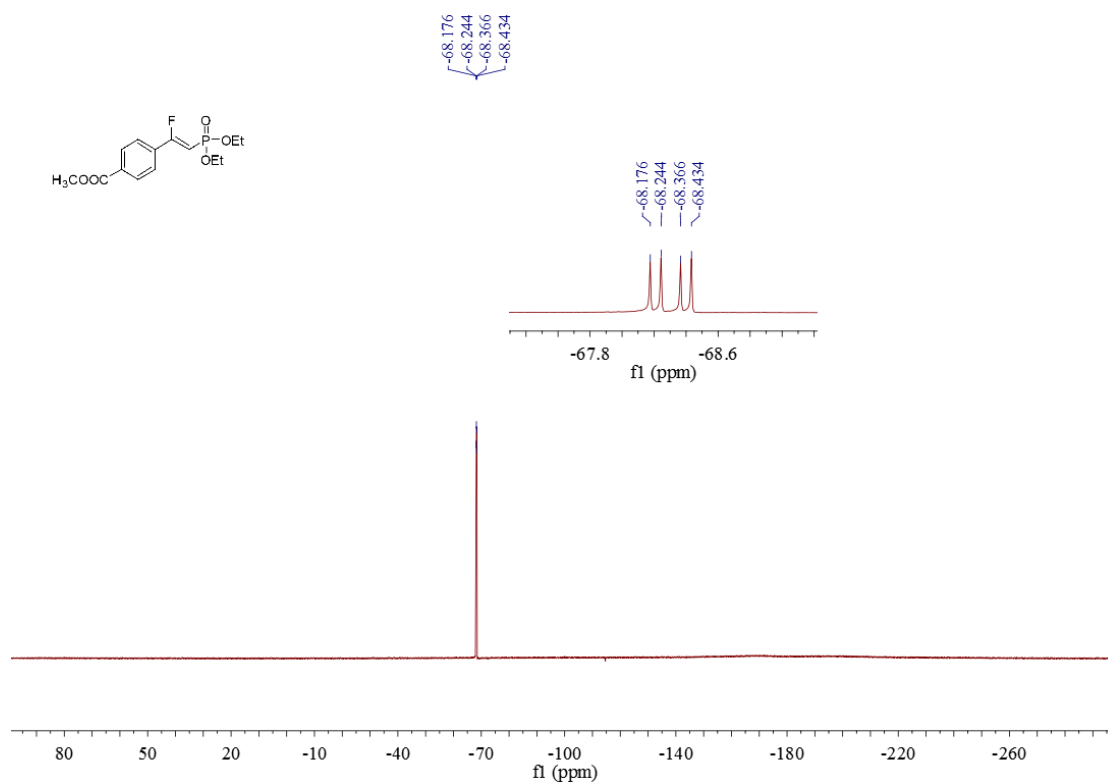



<sup>31</sup>P NMR

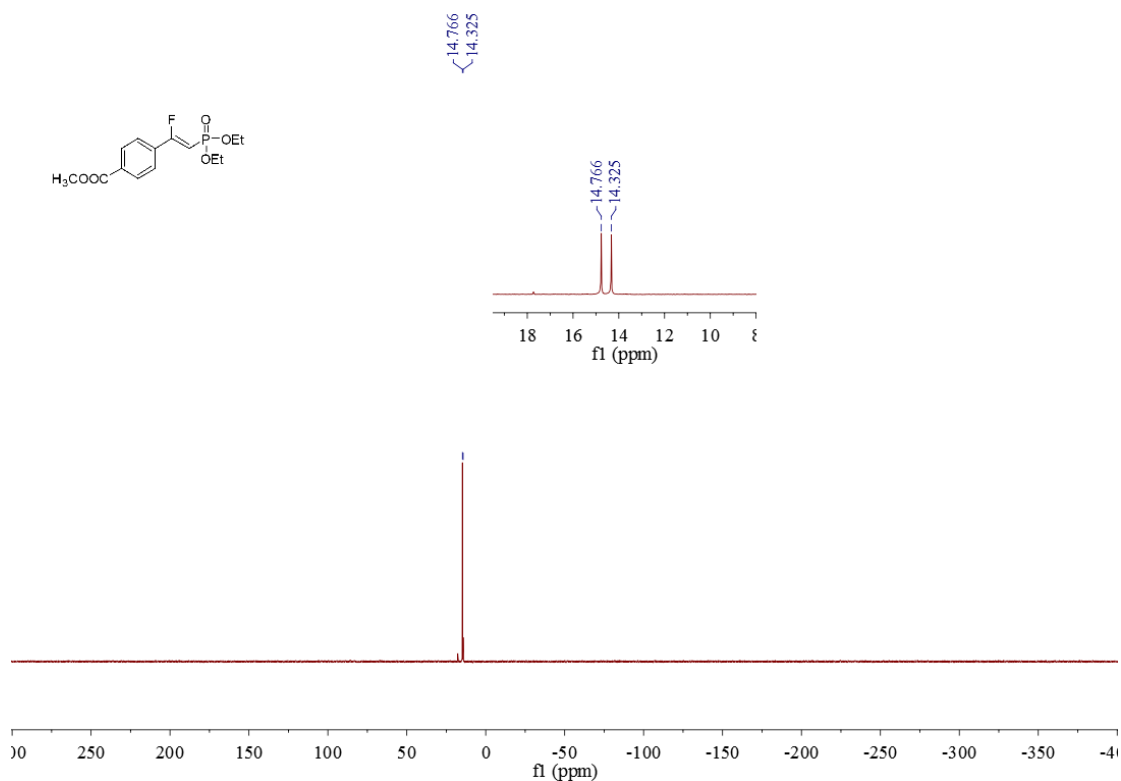

Diethyl (Z)-(1-fluoro-1-phenylprop-1-en-2-yl)phosphonate (2p)

<sup>1</sup>H NMR

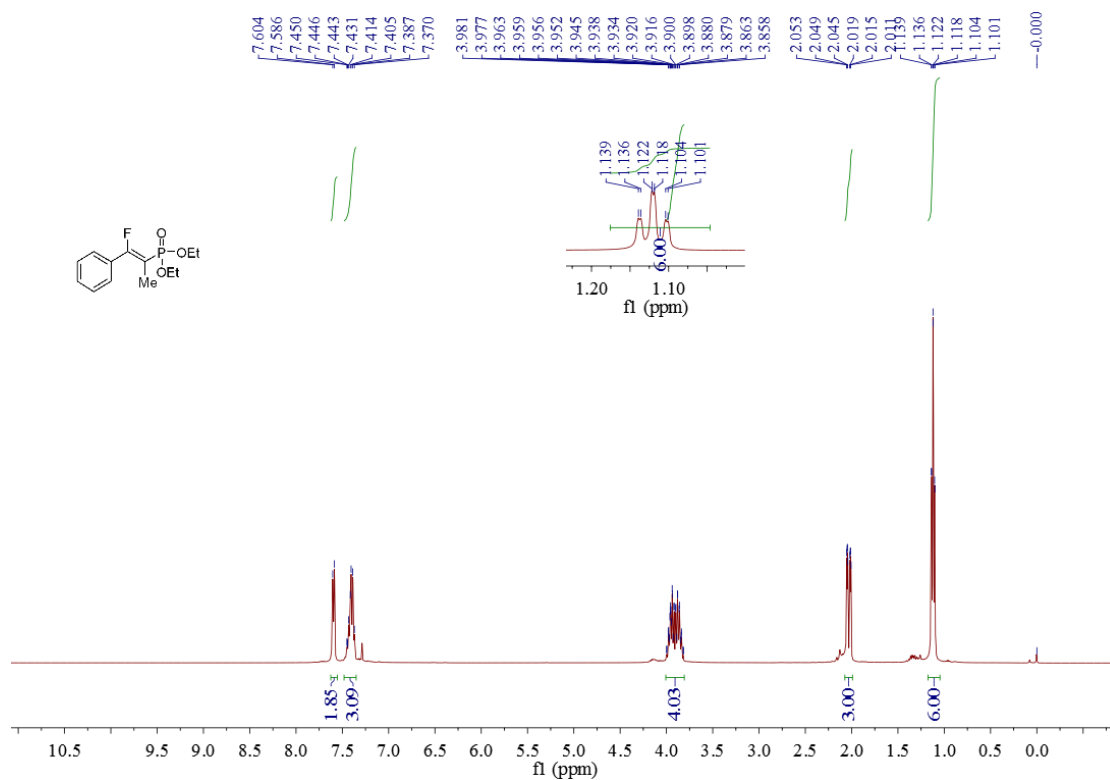

<sup>13</sup>C NMR

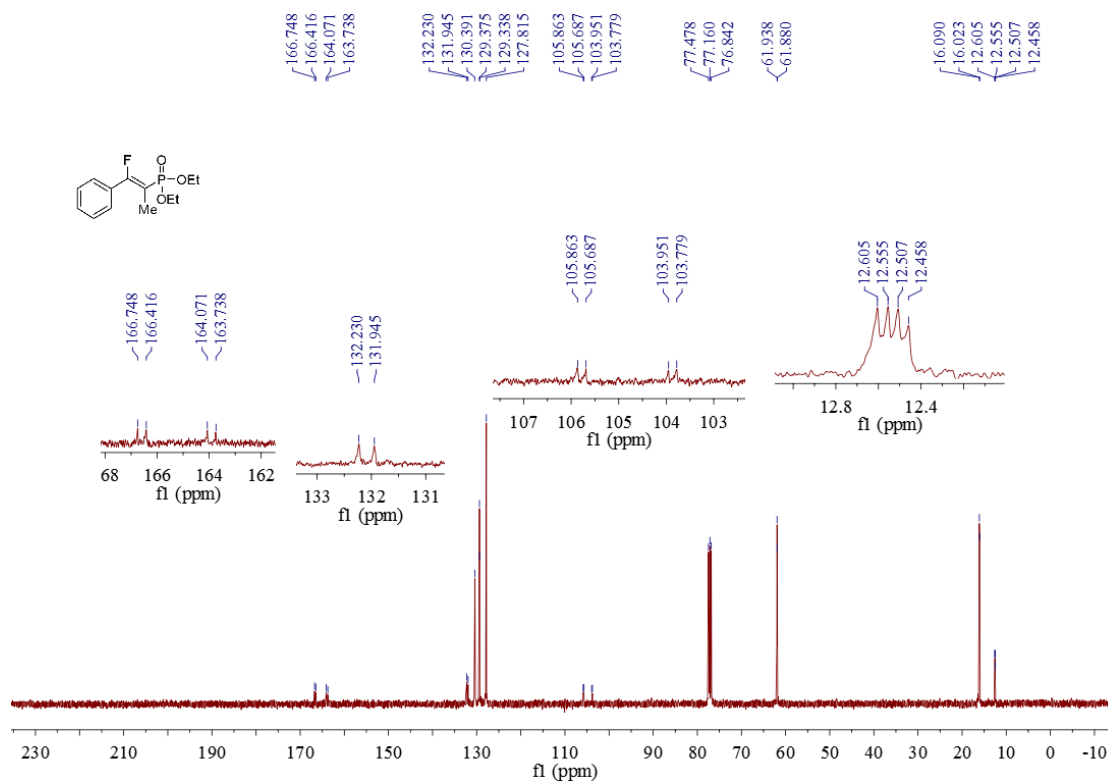

<sup>19</sup>F NMR

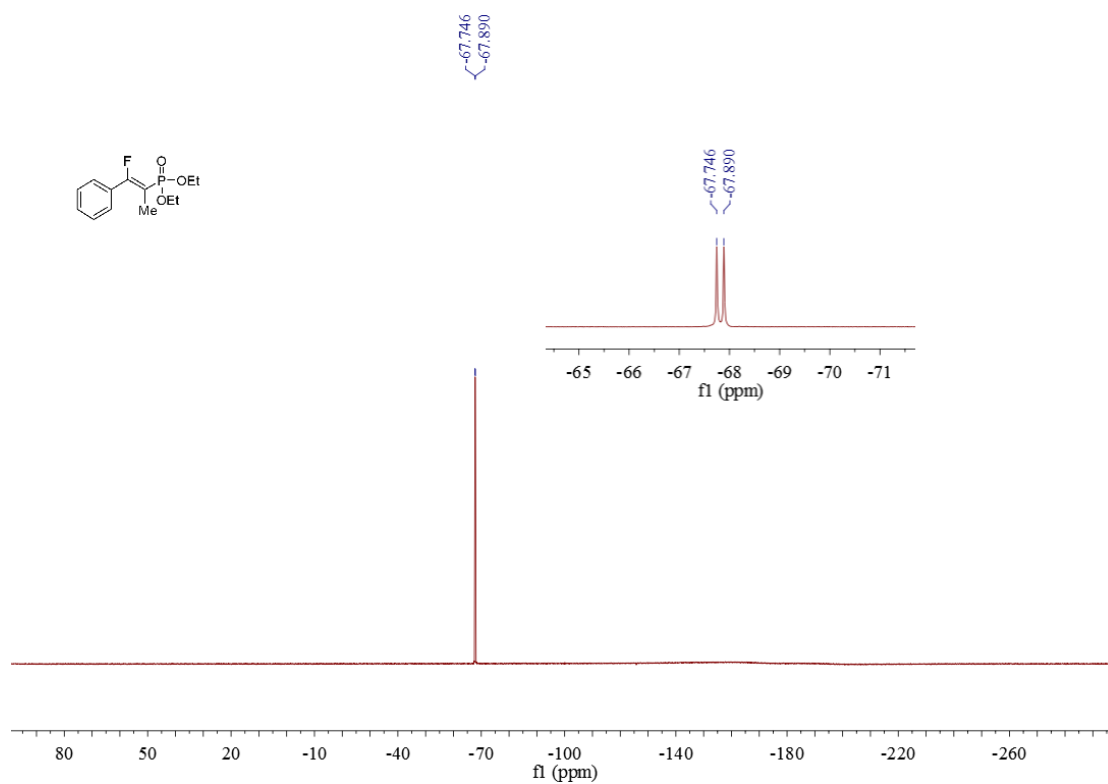

<sup>31</sup>P NMR

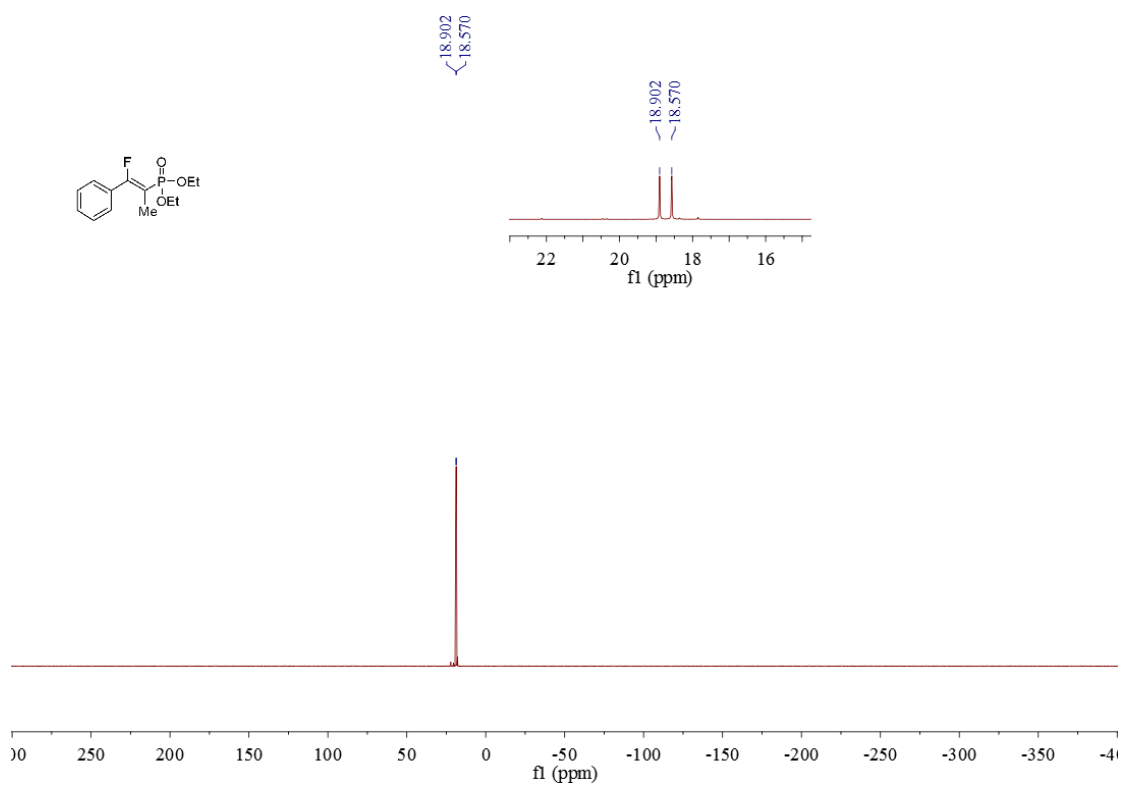

Diethyl (Z)-(1-fluoro-1-phenylbut-1-en-2-yl)phosphonate (2q)

<sup>1</sup>H NMR

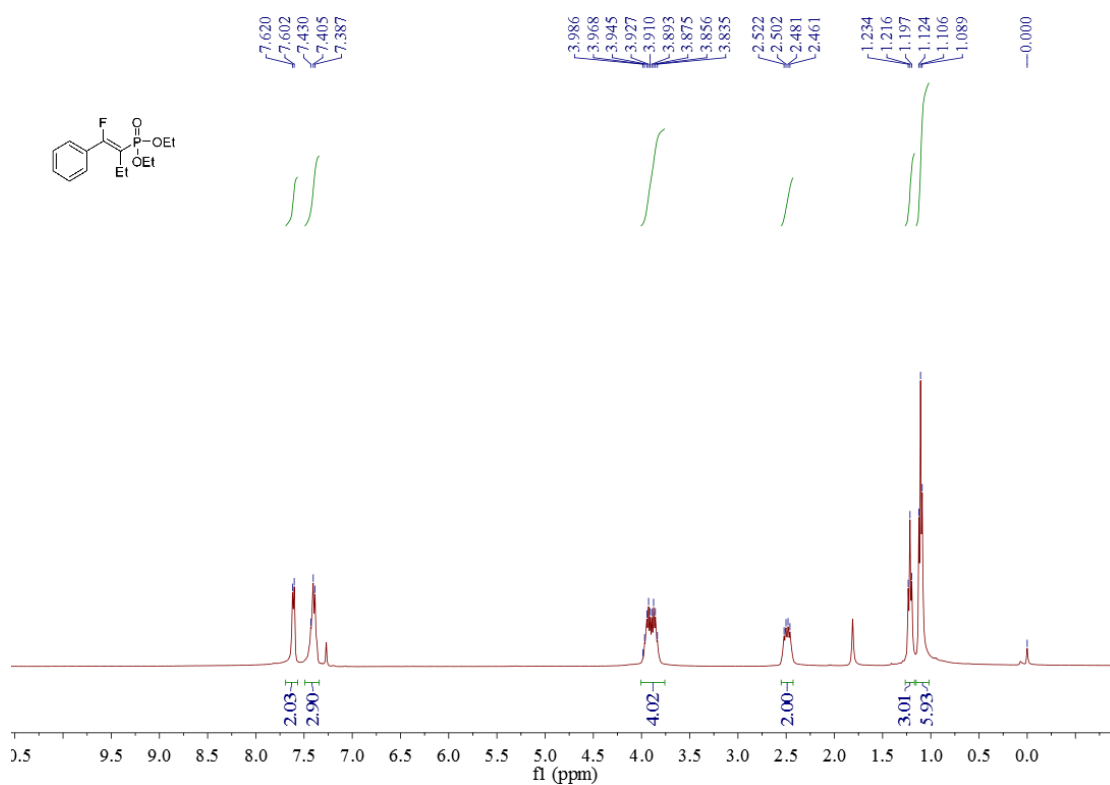

# <sup>13</sup>C NMR

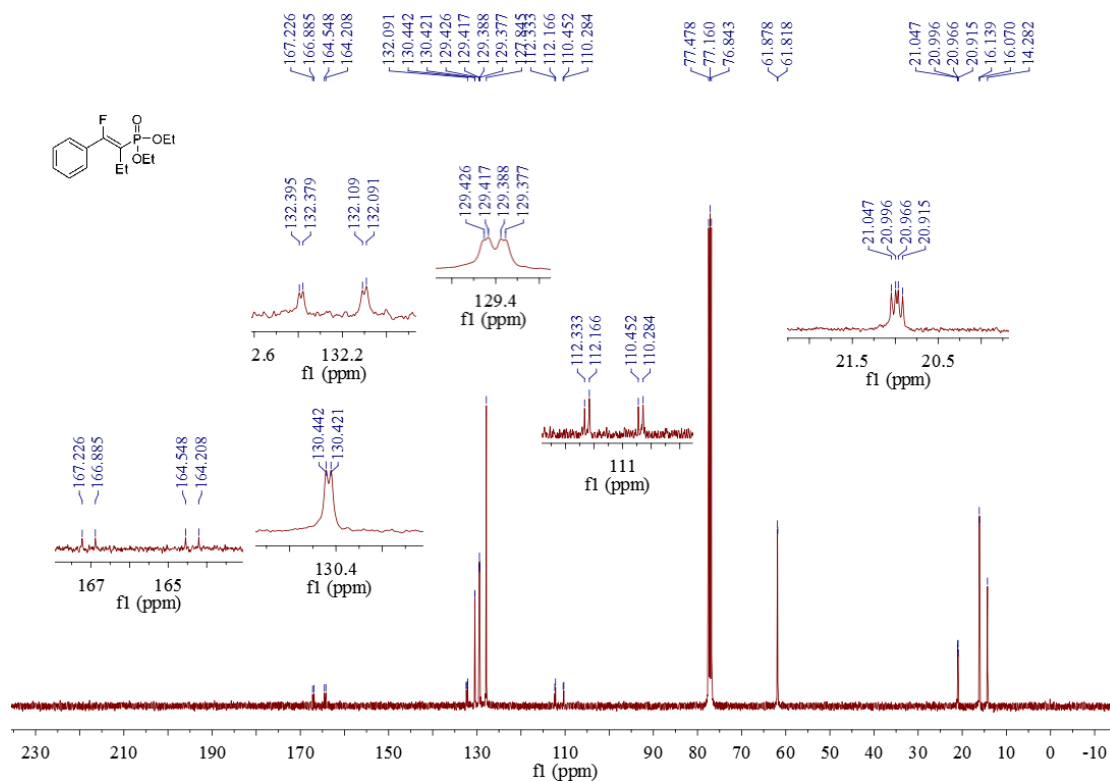

# <sup>19</sup>F NMR

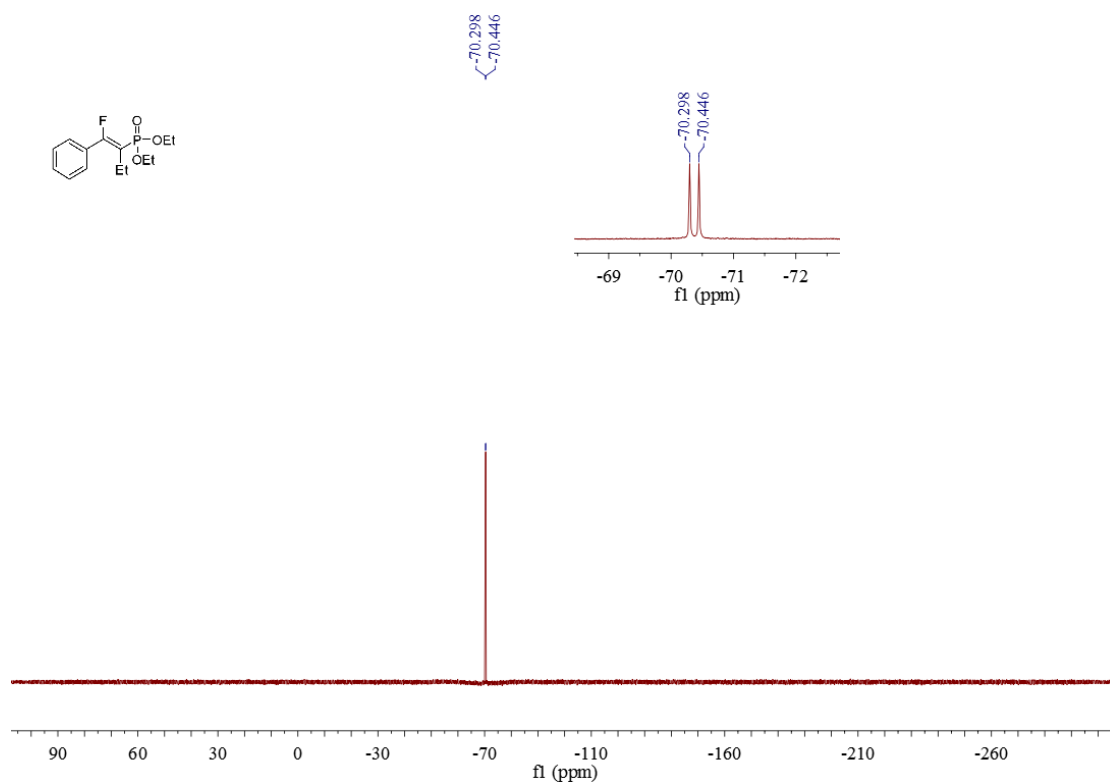

<sup>31</sup>P NMR

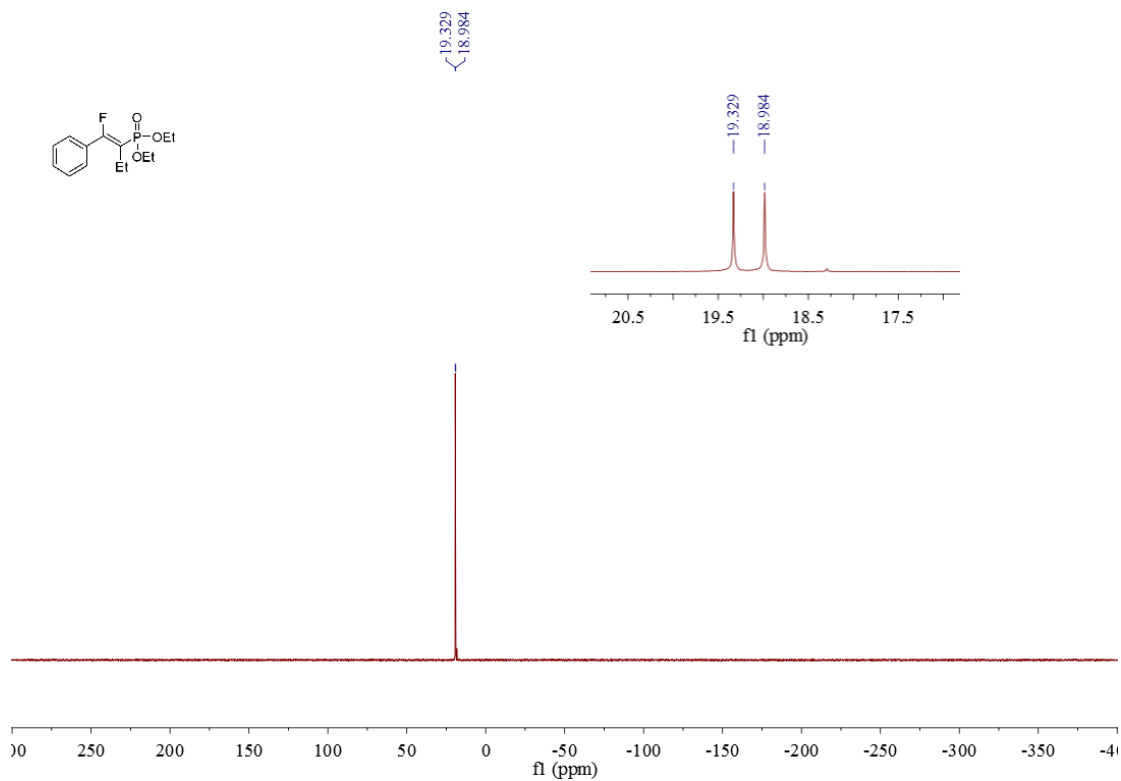

**Dimethyl (Z)-2-fluoro-2-phenylvinylphosphonate (3a)**

<sup>1</sup>H NMR

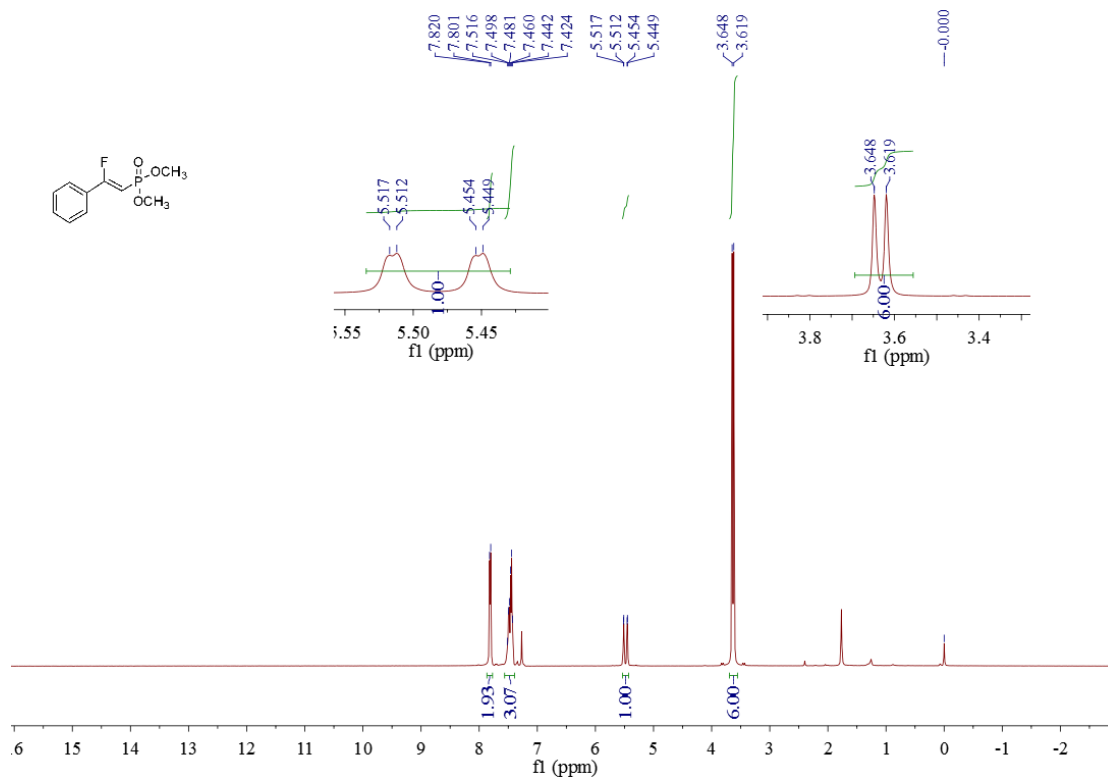

<sup>13</sup>C NMR

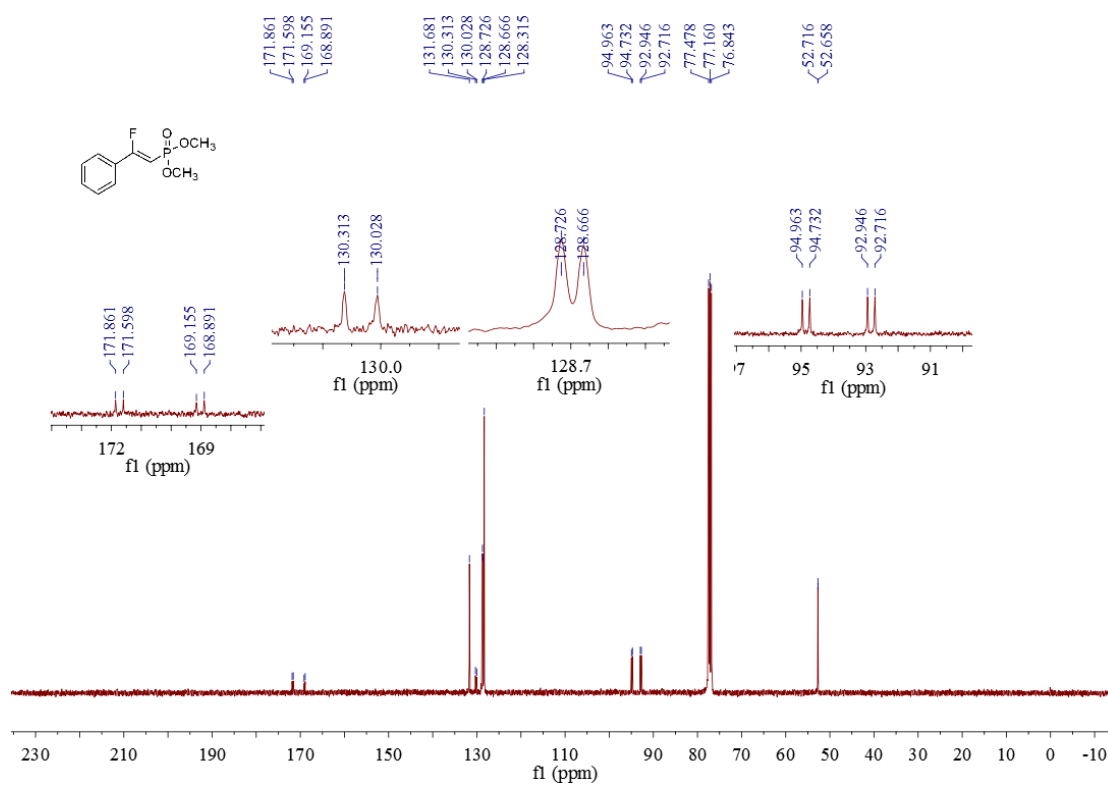

<sup>19</sup>F NMR

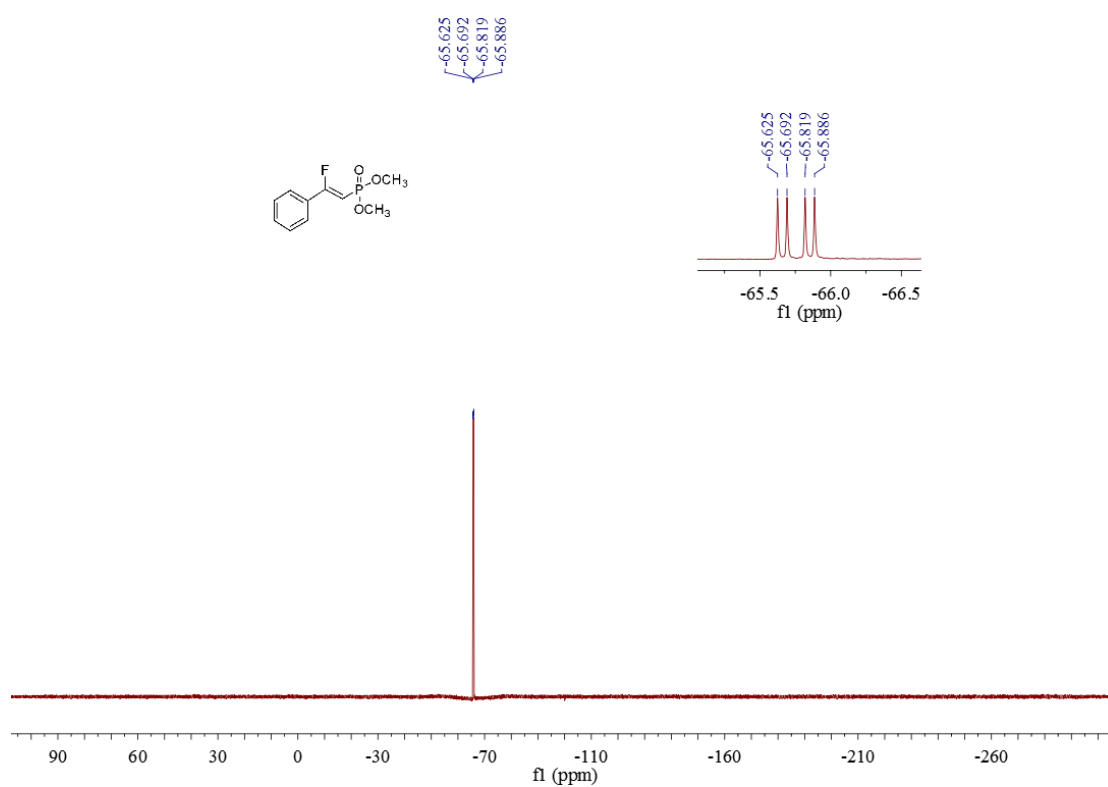

<sup>31</sup>P NMR

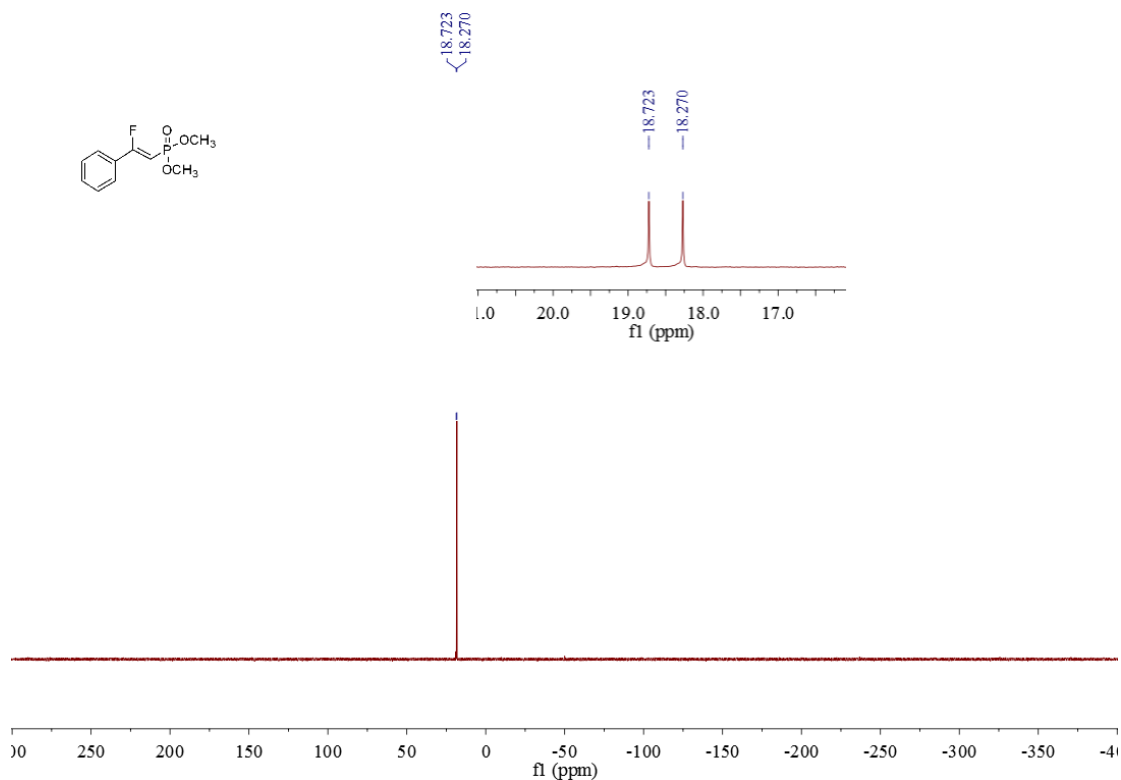

**Dimethyl (Z)-2-fluoro-2-(p-tolyl)vinyl phosphonate (3b)**

<sup>1</sup>H NMR

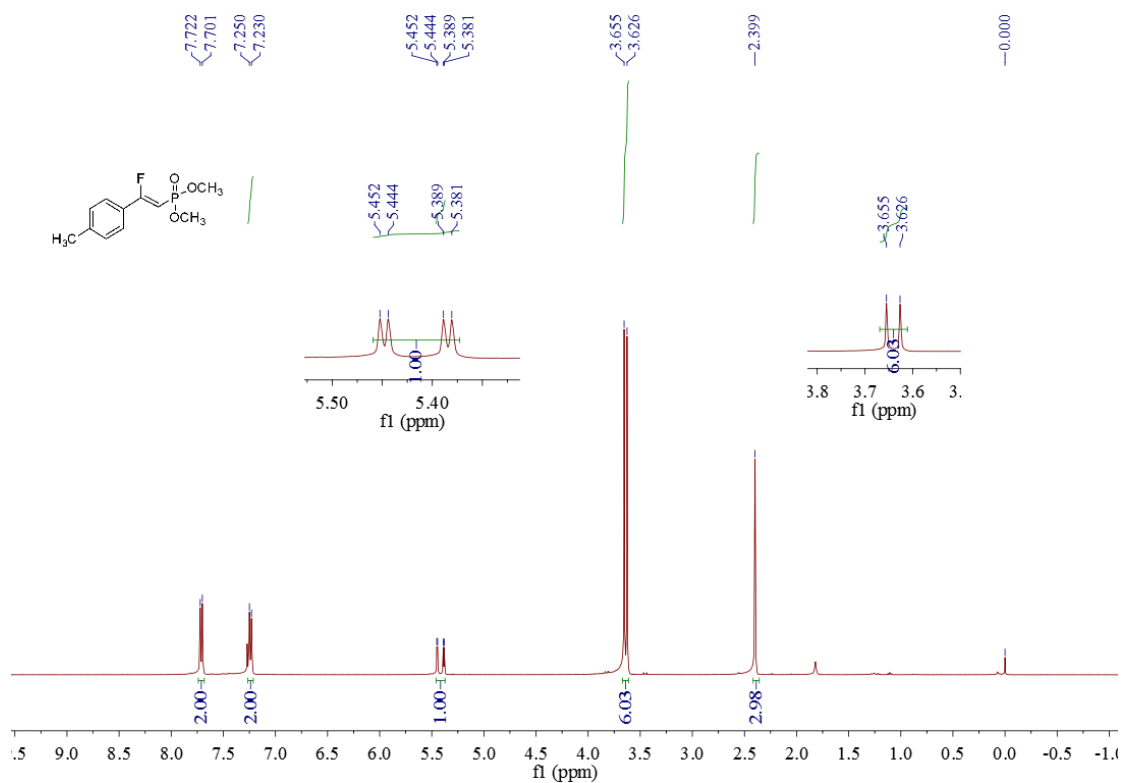

# <sup>13</sup>C NMR

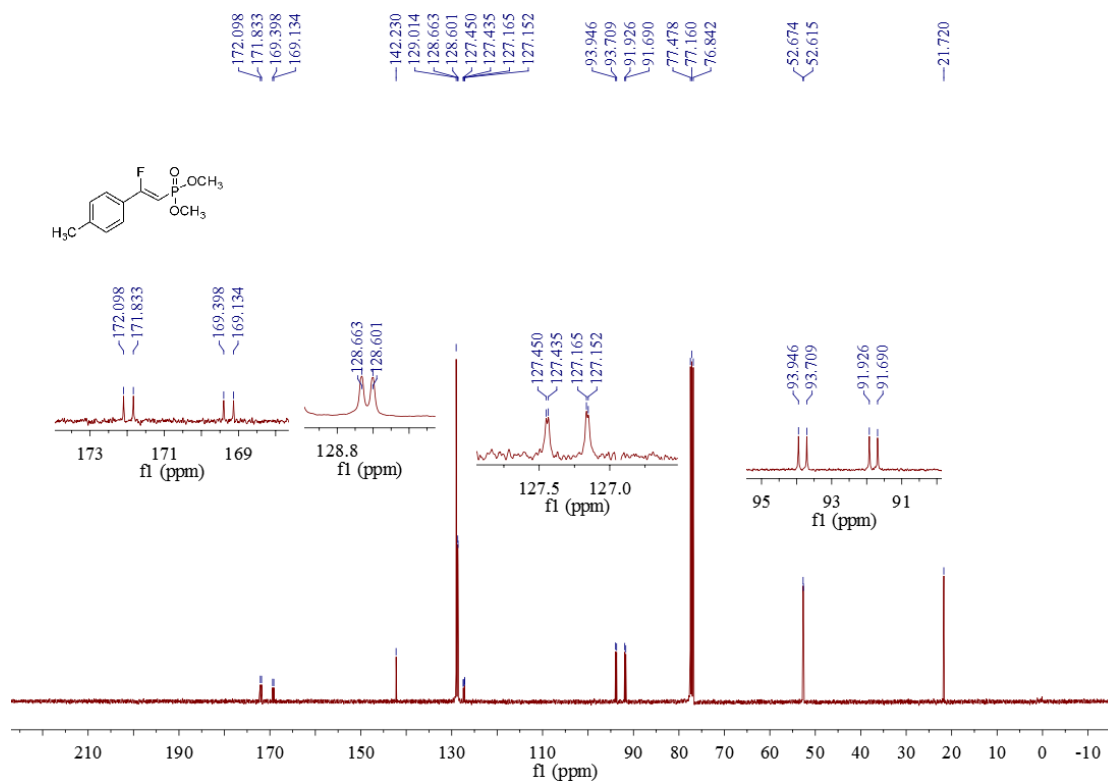

# <sup>19</sup>F NMR

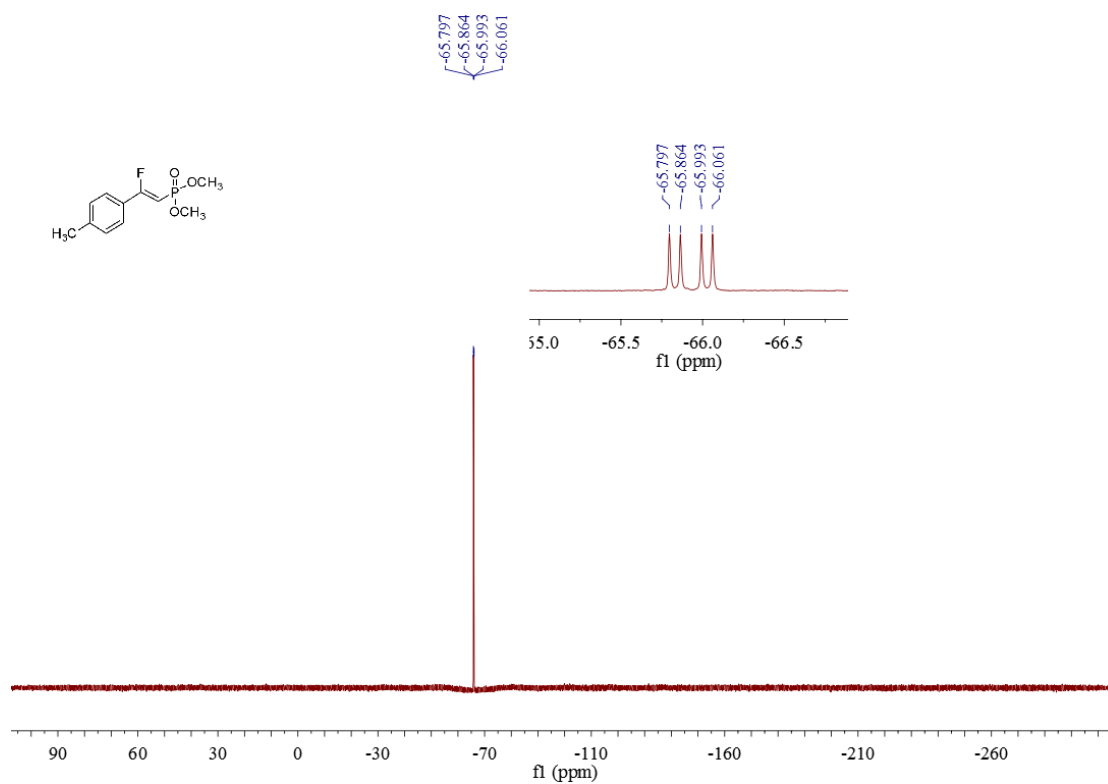



$^{31}\text{P}$  NMR

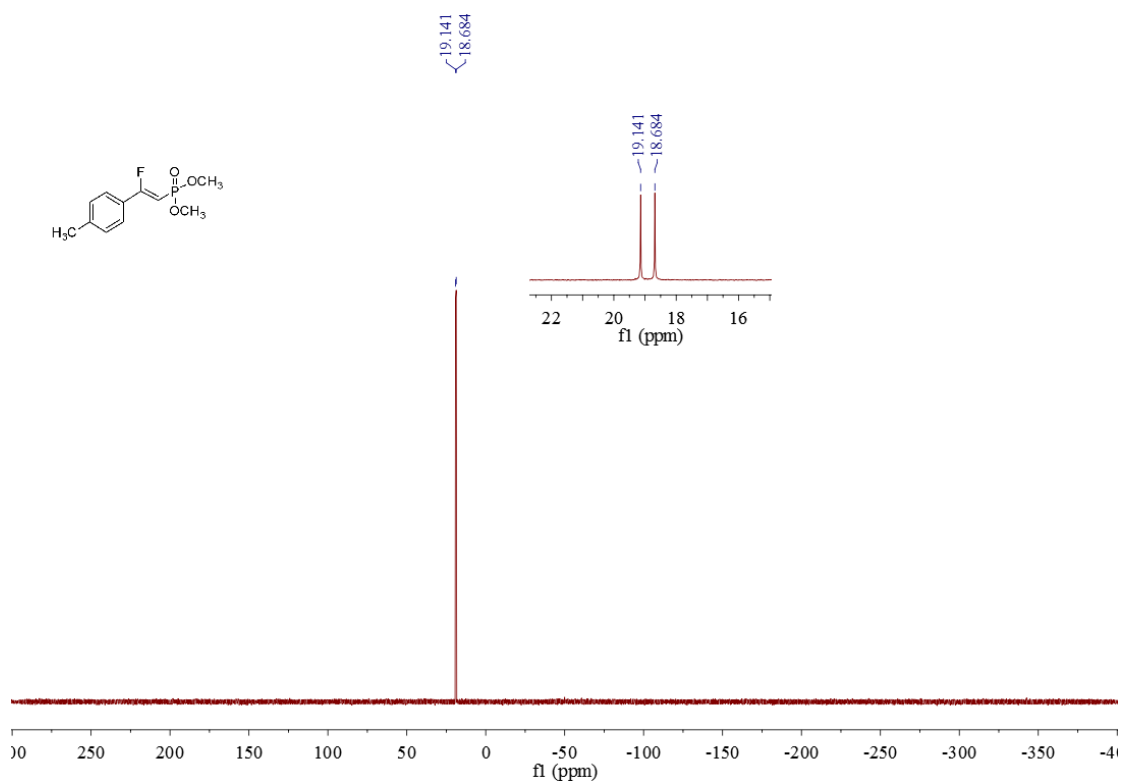

**Dimethyl (Z)-(2-fluoro-2-(4-fluorophenyl)vinyl) phosphonate (3c)**

$^1\text{H}$  NMR

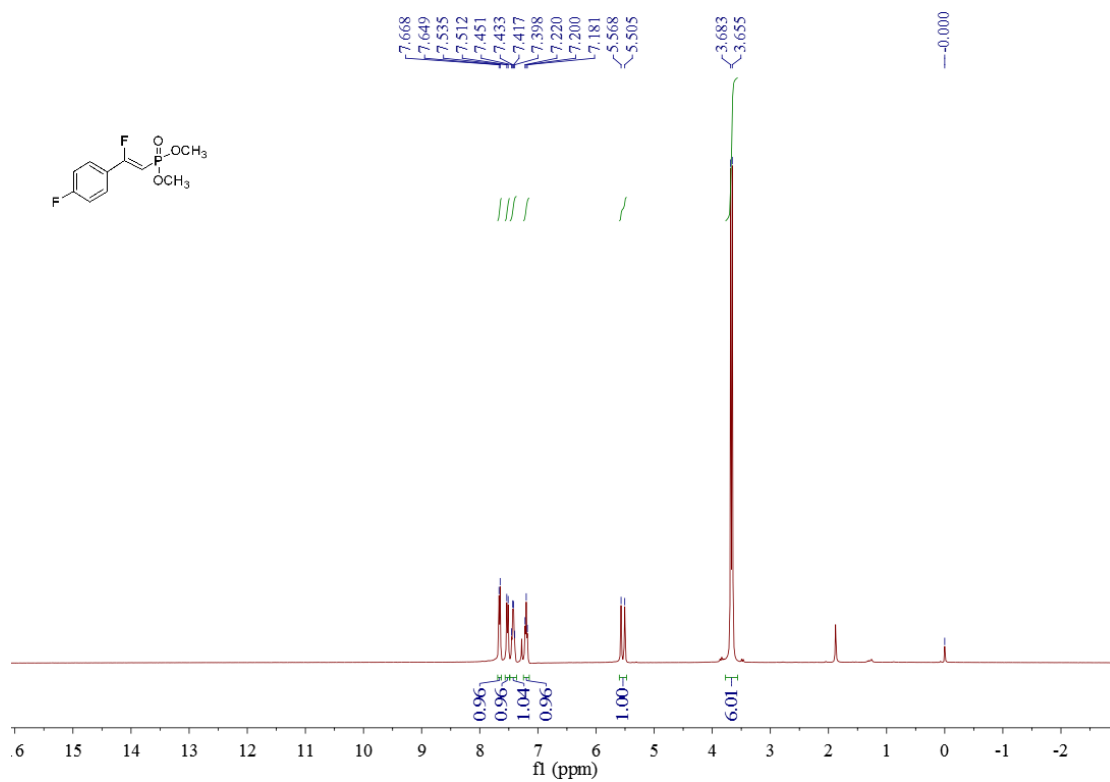

# <sup>13</sup>C NMR

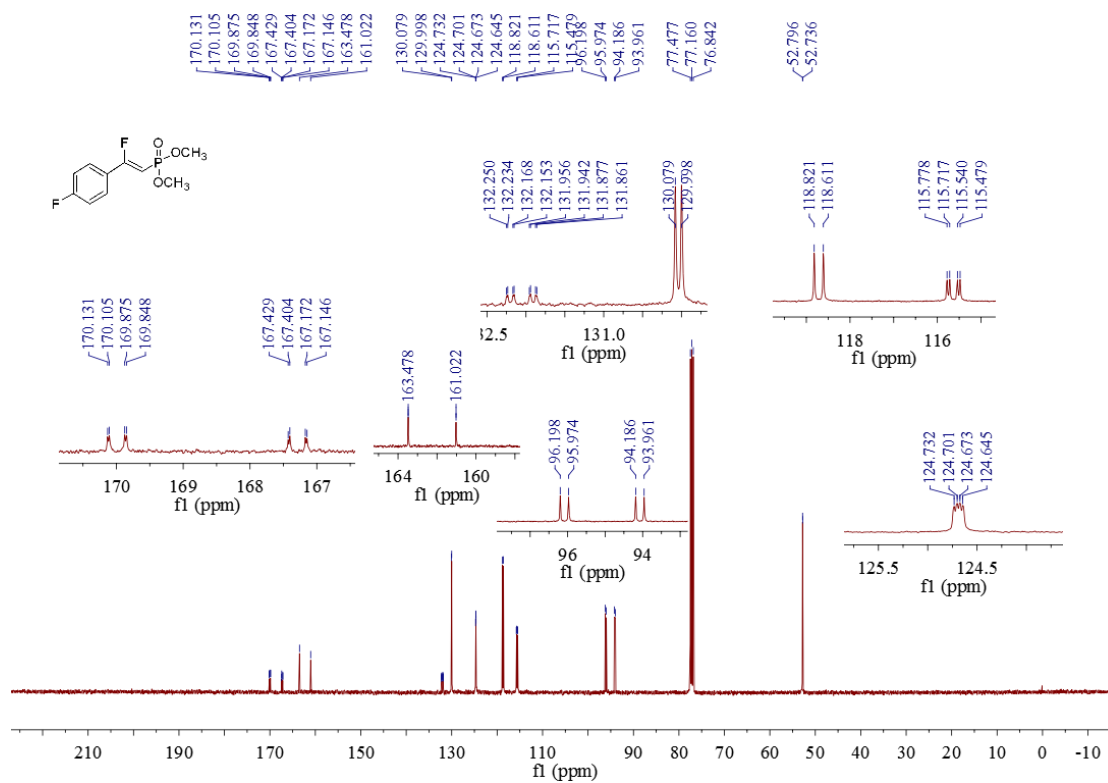

# <sup>19</sup>F NMR

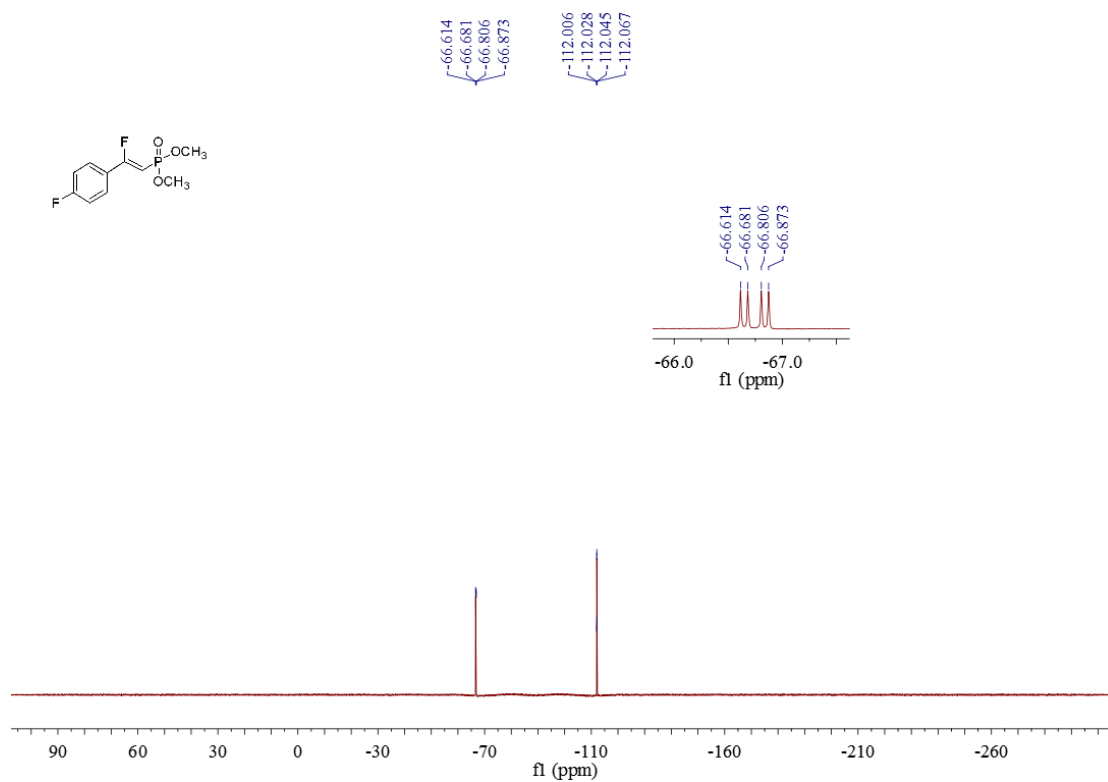

<sup>31</sup>P NMR

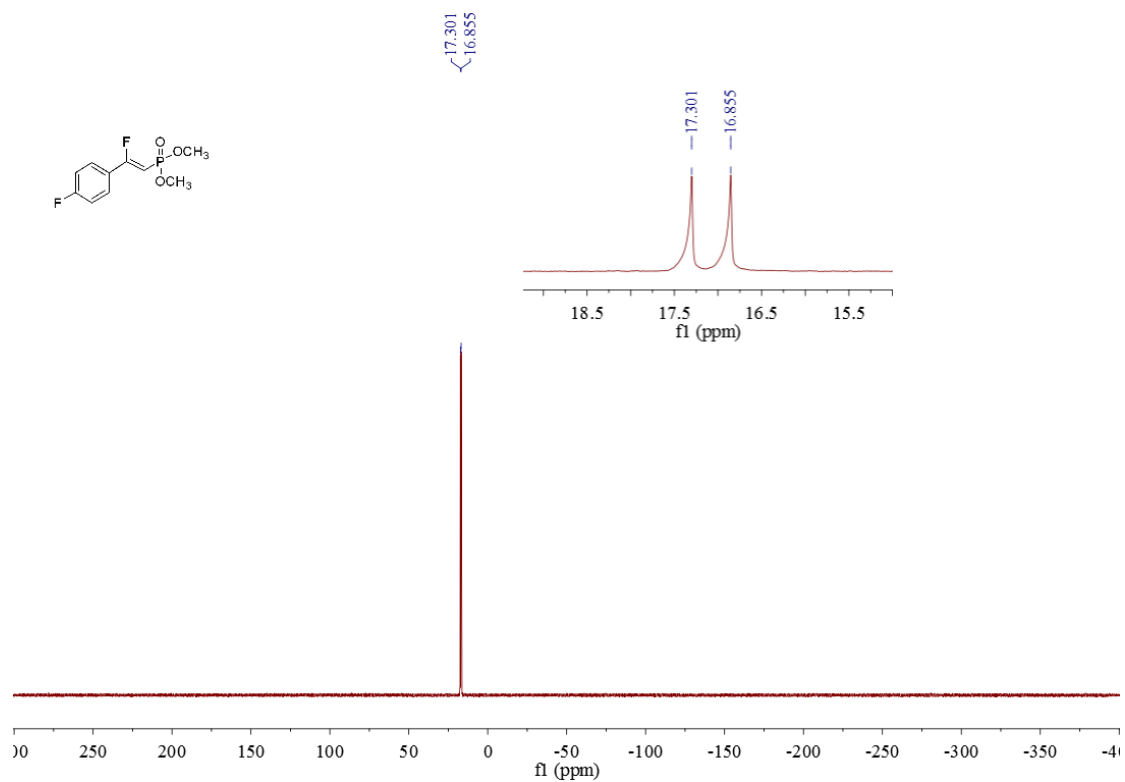

# Dimethyl (Z)-(2-(4-bromophenyl)-2-fluorovinyl)phosphonate (3d)

<sup>1</sup>H NMR

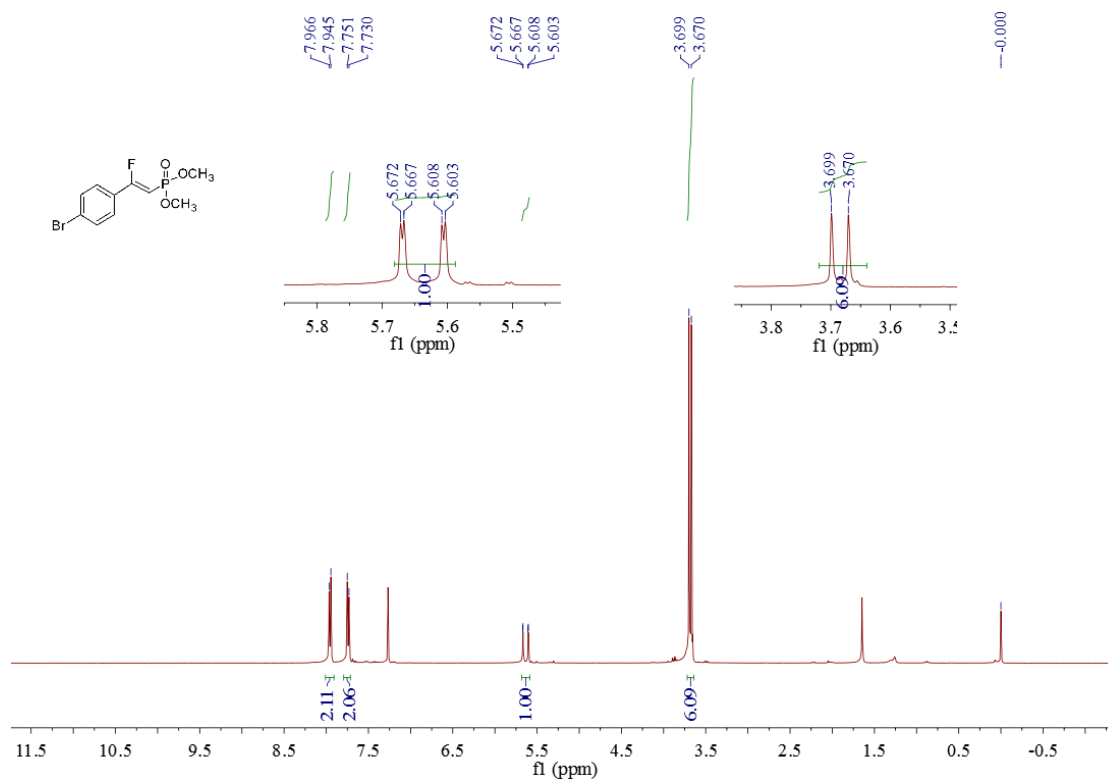

<sup>13</sup>C NMR

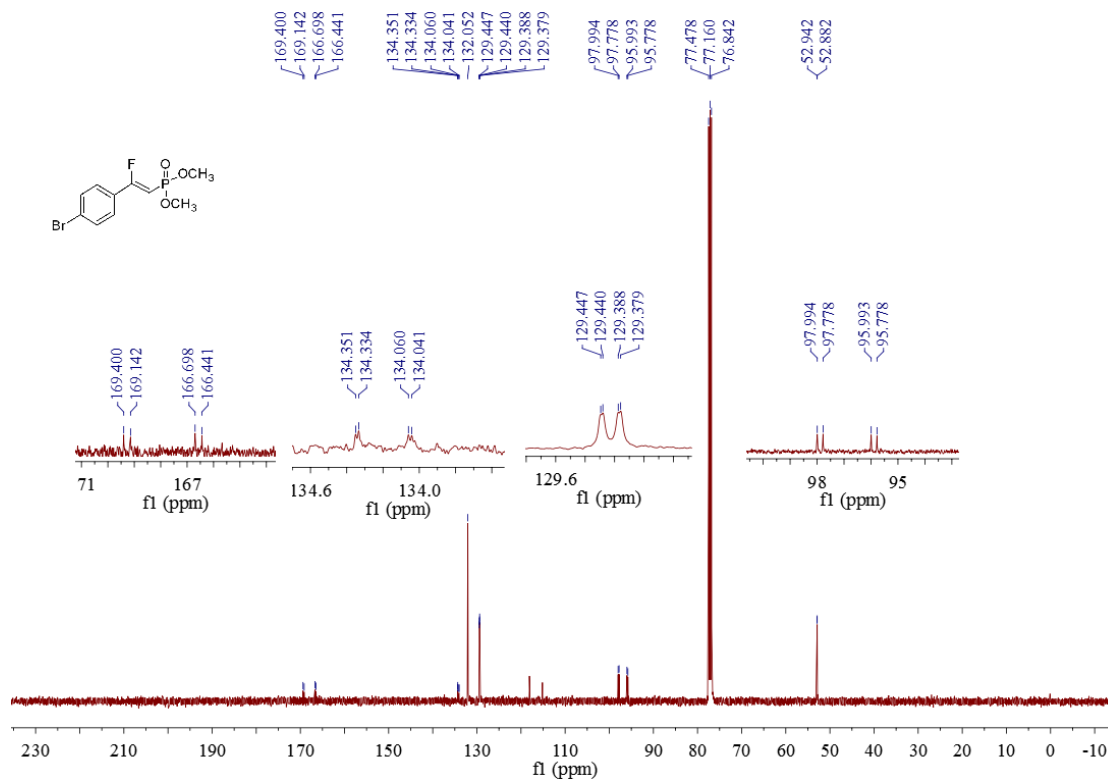

<sup>19</sup>F NMR

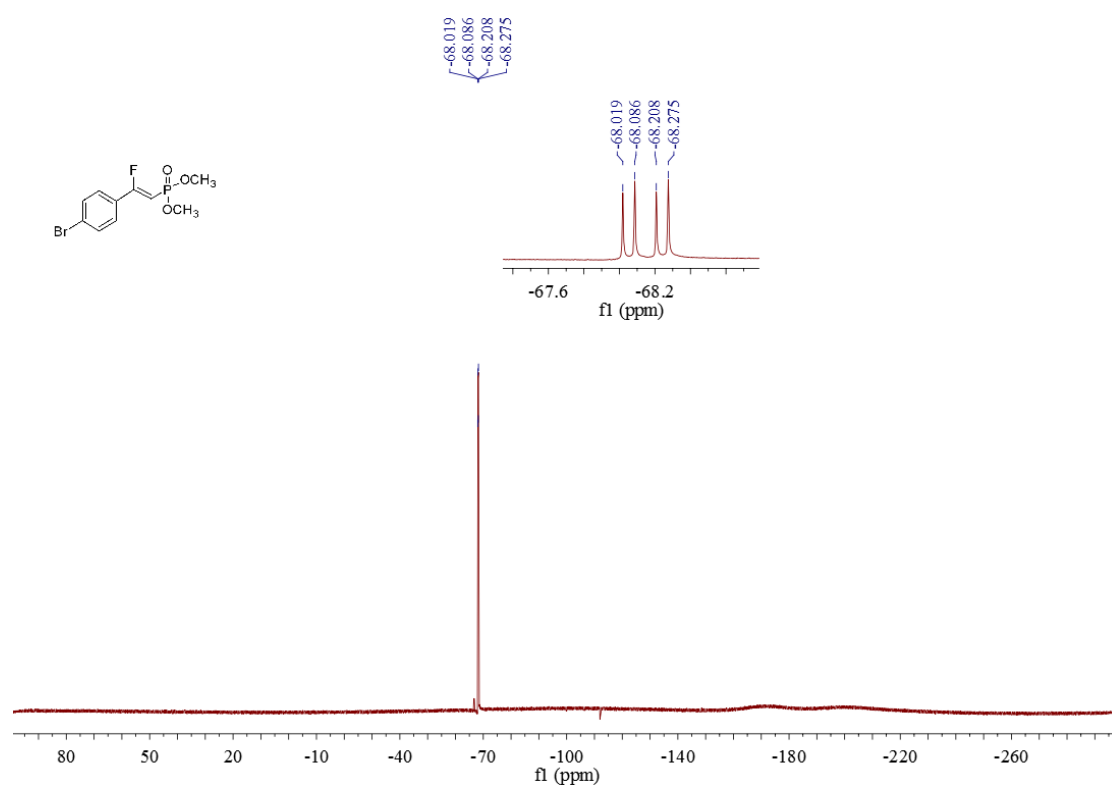

<sup>31</sup>P NMR

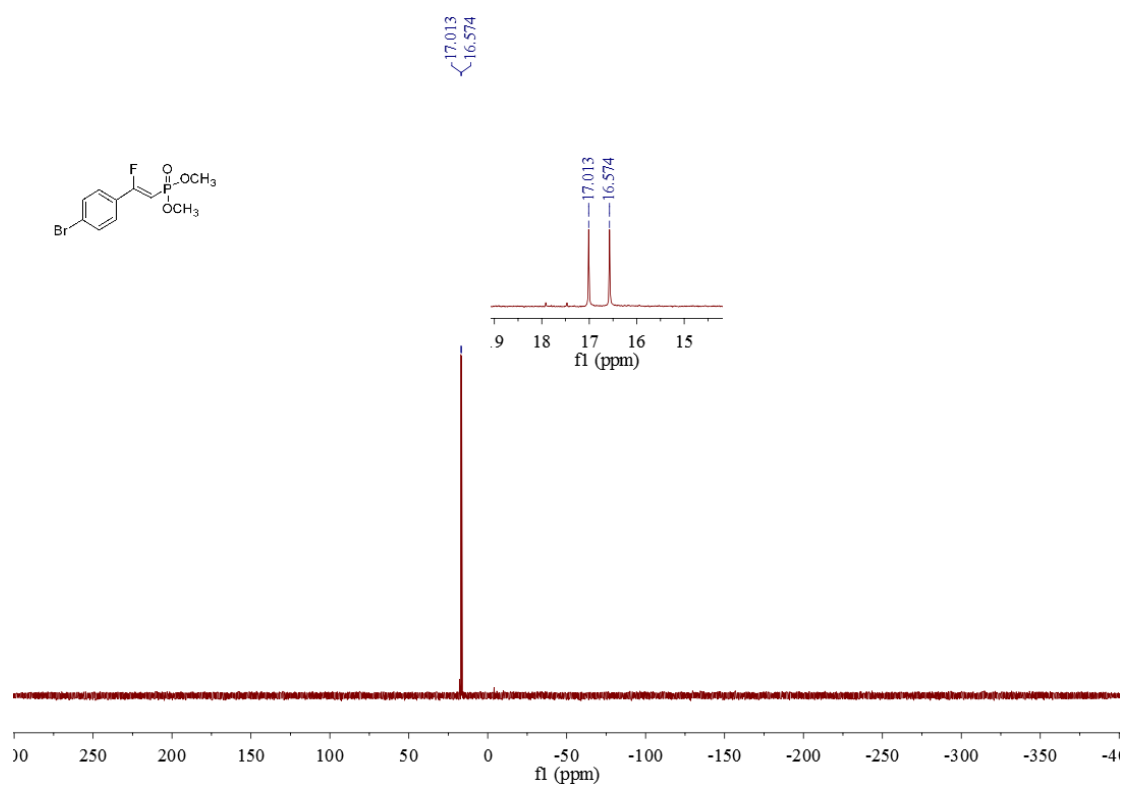

Supplement: Additional file 1 [file 1860-5397-16-258-S1.pdf]
